# Supplementary material for: Release kinetics study and anti-corrosion behaviour of a pH-responsive ionic liquid-loaded halloysite nanotube-doped epoxy coating
Source: Royal Society of Chemistry journal article supplement (doi:10.1039/d0ra01215g), 2020-01-01
Supplement: d0ra01215g1.xlsx [file d0ra01215g1.xlsx]

## Sheet: TGA Analysis
	Blank HNTs			[Bmim][Cl]			HNT-[Bmim][Cl]
	Temperature (oC)	Weight Loss (%)		Temperature (oC)	Weight Loss (%)		Temperature (oC)	Weight Loss (%)
	29.43	99.9048		30.28	99.8857		31.07	100
	29.42	99.9048		30.29	99.8857		31.04	99.9981
	29.42	99.8975		30.29	99.8857		31.03	99.992
	29.42	99.8975		30.28	99.8702		31.02	99.9791
	29.43	99.8975		30.28	99.8671		31	99.9748
	29.43	99.8902		30.27	99.864		30.98	99.9779
	29.4	99.8902		30.27	99.8609		30.98	99.9822
	29.41	99.8902		30.27	99.8237		30.99	99.9822
	29.42	99.8829		30.27	99.8454		30.95	99.9772
	29.43	99.8756		30.26	99.8485		30.93	99.9736
	29.42	99.9048		30.25	99.8516		30.91	99.9717
	29.44	99.9122		30.26	99.864		30.9	99.9699
	29.44	99.8975		30.26	99.8671		30.89	99.9674
	29.44	99.8902		30.25	99.8547		30.89	99.9655
	29.42	99.8975		30.26	99.8795		30.87	99.9643
	29.42	99.8975		30.24	99.8516		30.85	99.9637
	29.43	99.8902		30.25	99.8578		30.85	99.9613
	29.44	99.9048		30.26	99.8547		30.84	99.96
	29.42	99.8829		30.25	99.8578		30.83	99.976
	29.44	99.8902		30.25	99.864		30.81	99.9736
	29.43	99.8975		30.23	99.864		30.81	99.9809
	29.43	99.8829		30.25	99.8609		30.79	99.9674
	29.41	99.8902		30.25	99.864		30.79	99.9502
	29.43	99.8975		30.23	99.864		30.78	99.9508
	29.45	99.8756		30.24	99.8702		30.77	99.9471
	29.43	99.8829		30.23	99.8671		30.76	99.9434
	29.42	99.8829		30.21	99.8671		30.76	99.9397
	29.43	99.8756		30.24	99.864		30.77	99.9379
	29.45	99.8756		30.21	99.8609		30.75	99.9342
	29.44	99.8902		30.23	99.864		30.75	99.9299
	29.42	99.8975		30.21	99.9198		30.76	99.9256
	29.43	99.8975		30.22	99.9043		30.77	99.9206
	29.45	99.8902		30.23	99.9074		30.76	99.9274
	29.45	99.8829		30.22	99.9043		30.77	99.9311
	29.42	99.8683		30.2	99.9012		30.76	99.9323
	29.46	99.8829		30.21	99.9043		30.78	99.9373
	29.45	99.9048		30.2	99.9074		30.76	99.9268
	29.46	99.8975		30.22	99.9074		30.78	99.9225
	29.44	99.9268		30.19	99.9074		30.78	99.9206
	29.45	99.9268		30.19	99.9136		30.79	99.9188
	29.44	99.9341		30.2	99.9167		30.8	99.9163
	29.44	99.9488		30.21	99.9229		30.81	99.9133
	29.45	99.9634		30.19	99.9167		30.82	99.9108
	29.44	100.007		30.19	99.9167		30.82	99.909
	29.45	100.015		30.21	99.9167		30.84	99.9053
	29.45	99.839		30.19	99.9446		30.85	99.9071
	29.45	99.7731		30.18	99.9415		30.87	99.9034
	29.45	99.7731		30.18	99.926		30.87	99.9016
	29.46	99.7804		30.19	99.9291		30.87	99.8948
	29.46	99.7804		30.18	99.9229		30.89	99.8973
	29.45	99.7878		30.16	99.9229		30.9	99.8973
	29.45	99.7878		30.18	99.9198		30.93	99.8942
	29.47	99.7878		30.2	99.9198		30.94	99.885
	29.44	99.7804		30.18	99.9167		30.96	99.8837
	29.45	99.7731		30.17	99.9136		30.98	99.885
	29.45	99.7731		30.16	99.9136		30.99	99.8856
	29.46	99.7585		30.17	99.9105		31.01	99.8757
	29.47	99.7585		30.17	99.9043		31.02	99.8684
	29.44	99.7658		30.15	99.9043		31.04	99.8628
	29.45	99.7658		30.16	99.9167		31.06	99.8542
	29.46	99.7585		30.17	99.9167		31.08	99.7792
	29.45	99.7365		30.16	99.9198		31.09	99.8198
	29.46	99.7219		30.15	99.9198		31.13	99.8339
	29.46	99.7292		30.16	99.9167		31.12	99.8431
	29.46	99.7365		30.16	99.9105		31.16	99.8481
	29.47	99.7365		30.15	99.9105		31.18	99.8493
	29.47	99.7292		30.13	99.9136		31.19	99.8505
	29.45	99.7219		30.13	99.9136		31.23	99.8524
	29.47	99.7146		30.15	99.9198		31.24	99.8524
	29.47	99.7219		30.13	99.9167		31.27	99.8524
	29.45	99.7219		30.13	99.9136		31.29	99.8517
	29.46	99.6999		30.13	99.9136		31.31	99.8505
	29.48	99.6999		30.14	99.9136		31.34	99.8493
	29.47	99.6926		30.13	99.9105		31.38	99.8573
	29.46	99.7146		30.12	99.8361		31.4	99.8561
	29.46	99.7146		30.12	99.8547		31.43	99.8548
	29.47	99.6926		30.13	99.8609		31.44	99.8524
	29.47	99.6706		30.11	99.864		31.46	99.8499
	29.47	99.6853		30.12	99.864		31.5	99.8474
	29.47	99.678		30.11	99.8671		31.53	99.8456
	29.49	99.678		30.14	99.8609		31.55	99.8431
	29.48	99.678		30.11	99.864		31.58	99.8413
	29.46	99.6853		30.11	99.864		31.6	99.8382
	29.47	99.678		30.12	99.8671		31.62	99.8358
	29.48	99.6853		30.12	99.8609		31.67	99.837
	29.47	99.678		30.1	99.864		31.69	99.8351
	29.46	99.678		30.1	99.8609		31.74	99.8339
	29.47	99.678		30.09	99.864		31.75	99.8327
	29.48	99.678		30.1	99.8609		31.78	99.8308
	29.48	99.6706		30.11	99.864		31.81	99.8284
	29.47	99.678		30.09	99.864		31.85	99.8234
	29.46	99.678		30.09	99.864		31.88	99.8234
	29.49	99.678		30.1	99.8578		31.9	99.8185
	29.48	99.6706		30.08	99.8609		31.95	99.8191
	29.47	99.6706		30.09	99.8609		31.97	99.8161
	29.47	99.6706		30.08	99.8578		32.01	99.8148
	29.48	99.6706		30.1	99.8609		32.05	99.8136
	29.48	99.6706		30.08	99.8609		32.07	99.8124
	29.47	99.6706		30.08	99.8609		32.1	99.8105
	29.48	99.6706		30.08	99.8578		32.14	99.8068
	29.49	99.6706		30.1	99.8609		32.17	99.8044
	29.49	99.6706		30.08	99.8609		32.22	99.8013
	29.47	99.6633		30.09	99.8609		32.26	99.7982
	29.45	99.6633		30.07	99.8578		32.28	99.7952
	29.49	99.6633		30.08	99.8547		32.29	99.797
	29.48	99.656		30.05	99.8578		32.35	99.7939
	29.47	99.656		30.06	99.8547		32.38	99.7902
	29.47	99.6633		30.06	99.8578		32.42	99.7872
	29.5	99.656		30.08	99.8516		32.46	99.7859
	29.5	99.656		30.07	99.8547		32.51	99.7841
	29.5	99.6487		30.06	99.8516		32.53	99.7828
	29.5	99.6487		30.05	99.8547		32.59	99.7828
	29.5	99.656		30.06	99.8547		32.61	99.7785
	29.49	99.6487		30.06	99.8516		32.68	99.7761
	29.49	99.6487		30.05	99.8516		32.7	99.773
	29.47	99.6487		30.05	99.8516		32.75	99.7706
	29.48	99.6487		30.05	99.8485		32.79	99.7681
	29.51	99.6487		30.03	99.8485		32.82	99.7662
	29.49	99.6487		30.04	99.8485		32.87	99.7662
	29.49	99.6414		30.04	99.8485		32.9	99.7632
	29.49	99.6414		30.03	99.8485		32.94	99.7613
	29.5	99.6414		30.04	99.8485		33	99.7601
	29.49	99.6414		30.03	99.8485		33.03	99.7564
	29.5	99.6414		30.02	99.8485		33.08	99.7533
	29.48	99.6414		30.04	99.8485		33.11	99.7515
	29.48	99.6414		30.03	99.8485		33.17	99.749
	29.5	99.6341		30.03	99.8454		33.21	99.7459
	29.5	99.6341		30.03	99.8454		33.25	99.7435
	29.49	99.6341		30.03	99.8454		33.29	99.7422
	29.5	99.6341		30.02	99.8454		33.32	99.7422
	29.49	99.6267		30.02	99.8423		33.37	99.7386
	29.5	99.6267		30.02	99.8423		33.41	99.7367
	29.5	99.6267		30.04	99.8423		33.47	99.7312
	29.49	99.6267		30	99.8423		33.5	99.7293
	29.5	99.6267		30.01	99.8423		33.53	99.7263
	29.51	99.6267		30.01	99.8423		33.58	99.7232
	29.51	99.6267		30.01	99.8423		33.65	99.7207
	29.5	99.6267		29.99	99.8423		33.7	99.7207
	29.5	99.6194		30.02	99.8392		33.75	99.7189
	29.51	99.6194		30.01	99.8423		33.78	99.7195
	29.51	99.6194		30.01	99.8392		33.82	99.7121
	29.51	99.6194		29.99	99.8392		33.88	99.709
	29.52	99.6121		30.01	99.8392		33.92	99.7066
	29.5	99.6121		30.01	99.8392		33.96	99.7053
	29.49	99.6121		30.01	99.8392		34.02	99.7023
	29.51	99.6048		30	99.8392		34.05	99.7029
	29.51	99.6121		29.99	99.8392		34.1	99.7004
	29.51	99.6048		30	99.8392		34.16	99.6992
	29.51	99.6121		30	99.8392		34.21	99.6937
	29.52	99.6121		30	99.8392		34.25	99.6943
	29.52	99.6121		30	99.8392		34.3	99.6912
	29.52	99.6048		30	99.8361		34.35	99.6918
	29.5	99.6048		29.99	99.8361		34.4	99.6881
	29.51	99.6048		29.97	99.8361		34.45	99.6844
	29.5	99.6048		29.99	99.8361		34.5	99.6832
	29.51	99.5974		29.98	99.8361		34.54	99.6795
	29.51	99.5901		29.98	99.8361		34.61	99.6777
	29.52	99.5974		29.98	99.8361		34.63	99.6758
	29.52	99.5974		29.98	99.8361		34.71	99.6721
	29.52	99.5901		29.98	99.833		34.77	99.6697
	29.52	99.5901		29.99	99.833		34.8	99.666
	29.51	99.5901		29.97	99.833		34.88	99.6641
	29.5	99.5901		29.95	99.833		34.91	99.6629
	29.51	99.5901		29.97	99.833		34.98	99.6592
	29.52	99.5828		29.97	99.833		35.02	99.6586
	29.52	99.5901		29.95	99.8299		35.08	99.6568
	29.51	99.5828		29.96	99.833		35.13	99.6549
	29.51	99.5828		29.97	99.8299		35.17	99.6518
	29.51	99.5755		29.95	99.8299		35.23	99.6494
	29.52	99.5755		29.96	99.8299		35.28	99.6463
	29.53	99.5755		29.96	99.8299		35.34	99.6438
	29.51	99.5755		29.96	99.8299		35.38	99.6414
	29.53	99.5682		29.96	99.8299		35.44	99.6389
	29.52	99.5755		29.96	99.8268		35.49	99.6377
	29.52	99.5755		29.95	99.8299		35.55	99.6352
	29.51	99.5682		29.95	99.8299		35.6	99.6321
	29.51	99.5682		29.96	99.8268		35.65	99.6291
	29.51	99.5682		29.93	99.8268		35.72	99.6254
	29.52	99.5682		29.94	99.8268		35.77	99.6278
	29.51	99.5682		29.94	99.8268		35.83	99.6211
	29.53	99.5682		29.96	99.8268		35.88	99.6192
	29.53	99.5609		29.94	99.8268		35.96	99.6168
	29.51	99.5609		29.94	99.8268		35.98	99.6143
	29.51	99.5609		29.95	99.8237		36.05	99.6131
	29.52	99.5609		29.92	99.8237		36.11	99.61
	29.55	99.5609		29.94	99.8237		36.17	99.6088
	29.54	99.5609		29.93	99.8237		36.22	99.6051
	29.52	99.5609		29.95	99.8237		36.27	99.6014
	29.52	99.5609		29.93	99.8237		36.32	99.5971
	29.53	99.5609		29.92	99.8237		36.38	99.5977
	29.54	99.5609		29.92	99.8237		36.46	99.5928
	29.53	99.5535		29.94	99.8237		36.49	99.5891
	29.52	99.5535		29.93	99.8237		36.54	99.5848
	29.53	99.5462		29.92	99.8237		36.61	99.5829
	29.53	99.5462		29.9	99.8237		36.65	99.5823
	29.55	99.5462		29.93	99.8237		36.71	99.5799
	29.53	99.5462		29.93	99.8237		36.78	99.5768
	29.53	99.5462		29.91	99.8237		36.85	99.5737
	29.53	99.5389		29.9	99.8237		36.91	99.5688
	29.53	99.5389		29.92	99.8206		36.96	99.5688
	29.53	99.5389		29.93	99.8206		37.04	99.5645
	29.54	99.5316		29.9	99.8206		37.07	99.5608
	29.53	99.5316		29.91	99.8206		37.15	99.5577
	29.52	99.5389		29.93	99.8206		37.2	99.5528
	29.54	99.5389		29.92	99.8206		37.25	99.5509
	29.53	99.5389		29.91	99.8175		37.31	99.5479
	29.53	99.5316		29.91	99.8175		37.38	99.5442
	29.54	99.5316		29.9	99.8175		37.45	99.543
	29.54	99.5316		29.9	99.8175		37.48	99.5405
	29.55	99.5243		29.9	99.8175		37.55	99.5405
	29.55	99.5243		29.9	99.8175		37.63	99.5356
	29.54	99.5243		29.91	99.8144		37.69	99.5374
	29.55	99.5243		29.91	99.8144		37.72	99.5325
	29.55	99.5243		29.89	99.8144		37.8	99.53
	29.54	99.5243		29.9	99.8175		37.86	99.5239
	29.52	99.5243		29.9	99.8175		37.91	99.5208
	29.53	99.5243		29.9	99.8175		37.98	99.5177
	29.54	99.5169		29.88	99.8144		38.04	99.5116
	29.56	99.5169		29.9	99.8144		38.11	99.5134
	29.54	99.5169		29.91	99.8144		38.16	99.5097
	29.52	99.5169		29.9	99.8144		38.24	99.5073
	29.54	99.5169		29.88	99.8144		38.29	99.506
	29.55	99.5096		29.88	99.8144		38.34	99.5017
	29.53	99.5096		29.89	99.8144		38.42	99.4987
	29.55	99.5096		29.89	99.8144		38.47	99.4968
	29.56	99.5023		29.87	99.8144		38.53	99.4907
	29.55	99.5096		29.87	99.8144		38.59	99.4888
	29.54	99.5096		29.87	99.8144		38.66	99.4864
	29.53	99.5096		29.87	99.8113		38.73	99.4839
	29.56	99.5096		29.87	99.8113		38.77	99.4771
	29.56	99.5096		29.87	99.8113		38.85	99.4784
	29.55	99.5096		29.87	99.8113		38.9	99.4765
	29.56	99.5096		29.87	99.8113		38.97	99.4697
	29.56	99.5023		29.86	99.8113		39.03	99.466
	29.55	99.5023		29.86	99.8082		39.09	99.4648
	29.54	99.5023		29.86	99.8113		39.17	99.4617
	29.55	99.5023		29.86	99.8082		39.23	99.4574
	29.55	99.5023		29.87	99.8082		39.31	99.455
	29.54	99.5023		29.85	99.8082		39.35	99.4513
	29.54	99.495		29.87	99.8082		39.42	99.447
	29.55	99.495		29.85	99.8082		39.48	99.4458
	29.56	99.495		29.85	99.8082		39.55	99.4408
	29.55	99.495		29.85	99.8051		39.61	99.4371
	29.56	99.495		29.86	99.8051		39.67	99.4322
	29.54	99.495		29.83	99.8051		39.74	99.4322
	29.55	99.4877		29.85	99.8051		39.81	99.431
	29.55	99.4877		29.84	99.8051		39.88	99.4261
	29.56	99.495		29.86	99.8051		39.95	99.4181
	29.55	99.4877		29.85	99.8051		40.02	99.4175
	29.56	99.4877		29.83	99.802		40.06	99.4156
	29.56	99.4877		29.84	99.802		40.12	99.4101
	29.55	99.4877		29.84	99.802		40.2	99.4052
	29.54	99.4877		29.84	99.802		40.25	99.4045
	29.56	99.4804		29.85	99.802		40.34	99.4009
	29.57	99.473		29.84	99.802		40.39	99.399
	29.56	99.473		29.83	99.802		40.46	99.3984
	29.56	99.473		29.84	99.802		40.52	99.3953
	29.56	99.473		29.83	99.802		40.59	99.391
	29.57	99.4657		29.83	99.7989		40.65	99.3867
	29.55	99.473		29.83	99.802		40.72	99.3805
	29.55	99.473		29.84	99.7989		40.79	99.3787
	29.56	99.4657		29.83	99.7989		40.86	99.3707
	29.57	99.4657		29.83	99.7989		40.92	99.3652
	29.56	99.4657		29.83	99.7989		40.99	99.3658
	29.56	99.4657		29.81	99.7989		41.06	99.3652
	29.58	99.4657		29.82	99.7989		41.12	99.3639
	29.57	99.473		29.81	99.7958		41.18	99.3578
	29.56	99.4657		29.82	99.7958		41.25	99.3547
	29.57	99.4657		29.82	99.7958		41.33	99.3492
	29.55	99.4657		29.82	99.7958		41.38	99.3436
	29.56	99.4657		29.83	99.7958		41.46	99.343
	29.56	99.4657		29.83	99.7927		41.53	99.3436
	29.57	99.4584		29.82	99.7927		41.6	99.3375
	29.57	99.4584		29.8	99.7927		41.66	99.3289
	29.56	99.4657		29.8	99.7958		41.73	99.327
	29.56	99.4584		29.83	99.7927		41.8	99.3233
	29.57	99.4584		29.82	99.7896		41.86	99.3221
	29.58	99.4584		29.8	99.7896		41.95	99.3209
	29.58	99.4584		29.79	99.7896		42.01	99.3147
	29.57	99.4584		29.81	99.7927		42.07	99.3086
	29.56	99.4584		29.81	99.7896		42.13	99.3073
	29.57	99.4584		29.8	99.7896		42.22	99.3061
	29.56	99.4511		29.81	99.7896		42.28	99.2981
	29.56	99.4511		29.82	99.7896		42.34	99.2963
	29.57	99.4437		29.81	99.7865		42.41	99.295
	29.58	99.4437		29.8	99.7865		42.49	99.2895
	29.58	99.4437		29.8	99.7834		42.55	99.2852
	29.58	99.4437		29.79	99.7834		42.62	99.2846
	29.58	99.4437		29.8	99.7834		42.7	99.2815
	29.58	99.4437		29.78	99.7834		42.76	99.2784
	29.57	99.4437		29.81	99.7834		42.83	99.2729
	29.58	99.4437		29.79	99.7834		42.9	99.2661
	29.58	99.4364		29.81	99.7896		42.97	99.268
	29.6	99.4364		29.78	99.7896		43.04	99.2612
	29.59	99.4291		29.8	99.7741		43.12	99.2581
	29.59	99.4291		29.8	99.7834		43.17	99.2501
	29.57	99.4291		29.78	99.7834		43.24	99.2483
	29.59	99.4291		29.78	99.7834		43.33	99.2477
	29.59	99.4291		29.8	99.7834		43.37	99.2378
	29.58	99.4218		29.79	99.7834		43.45	99.2403
	29.58	99.4218		29.79	99.7865		43.53	99.2415
	29.6	99.4218		29.79	99.7803		43.59	99.2317
	29.58	99.4218		29.79	99.7834		43.66	99.2231
	29.57	99.4218		29.78	99.7803		43.73	99.2231
	29.58	99.4218		29.78	99.7803		43.8	99.2218
	29.59	99.4218		29.79	99.7772		43.87	99.2163
	29.59	99.4218		29.79	99.7772		43.95	99.2095
	29.6	99.4218		29.79	99.7772		44.02	99.2052
	29.58	99.4218		29.77	99.7772		44.08	99.2065
	29.57	99.4218		29.77	99.7772		44.15	99.2009
	29.6	99.4145		29.78	99.7772		44.23	99.1929
	29.59	99.4145		29.76	99.7772		44.29	99.1899
	29.59	99.4072		29.77	99.7772		44.37	99.1892
	29.59	99.4072		29.77	99.7772		44.45	99.1825
	29.59	99.4072		29.75	99.7772		44.5	99.18
	29.58	99.4072		29.76	99.7772		44.59	99.1788
	29.58	99.4072		29.77	99.7772		44.67	99.1769
	29.58	99.4072		29.76	99.7772		44.74	99.1757
	29.58	99.3998		29.77	99.7772		44.81	99.164
	29.6	99.3998		29.76	99.7803		44.87	99.1548
	29.59	99.3998		29.76	99.7741		44.93	99.1542
	29.58	99.3998		29.76	99.7803		45.01	99.1517
	29.59	99.3998		29.75	99.7772		45.08	99.1468
	29.6	99.3998		29.75	99.7772		45.16	99.1431
	29.58	99.3998		29.76	99.7772		45.23	99.1333
	29.59	99.3998		29.76	99.7772		45.3	99.1333
	29.6	99.3998		29.75	99.7741		45.38	99.1314
	29.6	99.3925		29.76	99.7741		45.45	99.1277
	29.59	99.3998		29.76	99.7741		45.51	99.1259
	29.59	99.3925		29.75	99.771		45.6	99.1191
	29.61	99.3852		29.76	99.7741		45.65	99.1148
	29.6	99.3925		29.78	99.7741		45.74	99.1086
	29.59	99.3925		29.76	99.771		45.82	99.1086
	29.59	99.3852		29.75	99.771		45.88	99.1013
	29.6	99.3852		29.76	99.771		45.96	99.0964
	29.61	99.3852		29.75	99.771		46.03	99.0964
	29.59	99.3852		29.74	99.771		46.11	99.0884
	29.58	99.3852		29.75	99.771		46.17	99.0859
	29.61	99.3779		29.75	99.771		46.25	99.0804
	29.61	99.3779		29.74	99.7679		46.32	99.076
	29.59	99.3779		29.73	99.771		46.39	99.0674
	29.59	99.3779		29.74	99.771		46.46	99.0662
	29.63	99.3706		29.74	99.7679		46.54	99.0674
	29.62	99.3706		29.72	99.7679		46.61	99.0619
	29.6	99.3632		29.74	99.7679		46.68	99.057
	29.59	99.3632		29.75	99.7679		46.73	99.0502
	29.61	99.3632		29.74	99.7679		46.83	99.0465
	29.6	99.3632		29.74	99.7679		46.89	99.041
	29.59	99.3632		29.72	99.7679		46.97	99.0342
	29.59	99.3632		29.73	99.7679		47.04	99.0379
	29.62	99.3632		29.72	99.7648		47.11	99.0219
	29.61	99.3559		29.74	99.7648		47.18	99.0256
	29.59	99.3559		29.74	99.7648		47.26	99.0232
	29.6	99.3559		29.73	99.7648		47.33	99.0176
	29.59	99.3559		29.72	99.7648		47.4	99.0084
	29.6	99.3486		29.71	99.7648		47.48	99.001
	29.61	99.3559		29.71	99.7648		47.56	99.0022
	29.59	99.3486		29.72	99.7648		47.64	98.9985
	29.61	99.3559		29.71	99.7648		47.7	98.9924
	29.61	99.3559		29.72	99.7648		47.77	98.9936
	29.6	99.3559		29.71	99.7617		47.85	98.9844
	29.59	99.3559		29.72	99.7617		47.93	98.9807
	29.61	99.3486		29.72	99.7648		47.99	98.9733
	29.61	99.3486		29.72	99.7648		48.07	98.9666
	29.6	99.3486		29.71	99.7648		48.15	98.9629
	29.61	99.3486		29.71	99.7648		48.22	98.9598
	29.61	99.3413		29.72	99.7648		48.29	98.9549
	29.62	99.3486		29.73	99.7617		48.37	98.9512
	29.61	99.3486		29.71	99.7617		48.44	98.9487
	29.6	99.3413		29.71	99.7586		48.52	98.9383
	29.61	99.3413		29.73	99.7586		48.59	98.9383
	29.61	99.3413		29.7	99.7586		48.67	98.9272
	29.6	99.3413		29.71	99.7586		48.75	98.9309
	29.61	99.3413		29.69	99.7586		48.82	98.9253
	29.61	99.3413		29.7	99.7586		48.9	98.9124
	29.61	99.3413		29.71	99.7586		48.96	98.9094
	29.61	99.3413		29.7	99.7617		49.05	98.9087
	29.61	99.334		29.7	99.7586		49.11	98.9007
	29.6	99.334		29.71	99.7555		49.19	98.8946
	29.62	99.334		29.69	99.7555		49.27	98.8903
	29.62	99.334		29.7	99.7555		49.35	98.8817
	29.61	99.334		29.71	99.7555		49.43	98.8823
	29.62	99.3267		29.69	99.7524		49.49	98.878
	29.61	99.3267		29.7	99.7524		49.58	98.8675
	29.64	99.3267		29.7	99.7524		49.65	98.8724
	29.61	99.3267		29.7	99.7524		49.7	98.8626
	29.62	99.3267		29.69	99.7524		49.79	98.8571
	29.63	99.3267		29.69	99.7524		49.86	98.8503
	29.6	99.3267		29.69	99.7524		49.94	98.8472
	29.6	99.3193		29.7	99.7493		50.01	98.838
	29.61	99.3267		29.7	99.7524		50.08	98.8355
	29.63	99.3193		29.7	99.7586		50.16	98.8374
	29.62	99.3193		29.68	99.7586		50.23	98.8269
	29.62	99.3193		29.69	99.7586		50.32	98.822
	29.61	99.3193		29.69	99.7586		50.41	98.8201
	29.63	99.3193		29.68	99.7586		50.45	98.8171
	29.61	99.3193		29.67	99.7555		50.54	98.8011
	29.61	99.3193		29.69	99.7555		50.61	98.806
	29.62	99.3193		29.7	99.7555		50.7	98.7937
	29.63	99.3193		29.67	99.7555		50.76	98.798
	29.63	99.312		29.67	99.7555		50.84	98.7826
	29.6	99.312		29.7	99.7555		50.93	98.7863
	29.61	99.312		29.69	99.7524		51	98.7765
	29.61	99.312		29.67	99.7524		51.06	98.7709
	29.63	99.3193		29.68	99.7524		51.15	98.7623
	29.62	99.312		29.68	99.7524		51.22	98.7648
	29.61	99.312		29.68	99.7524		51.29	98.7568
	29.62	99.312		29.67	99.7524		51.36	98.7592
	29.62	99.312		29.66	99.7493		51.44	98.7476
	29.63	99.312		29.67	99.7493		51.52	98.7408
	29.61	99.3047		29.67	99.7493		51.59	98.7365
	29.62	99.312		29.66	99.7493		51.67	98.7273
	29.62	99.312		29.67	99.7462		51.76	98.7285
	29.62	99.312		29.68	99.7493		51.83	98.7107
	29.62	99.312		29.68	99.7462		51.9	98.718
	29.63	99.3047		29.67	99.7462		51.97	98.7064
	29.62	99.3047		29.67	99.7462		52.06	98.7057
	29.62	99.3047		29.66	99.7431		52.13	98.7027
	29.63	99.3047		29.66	99.74		52.21	98.6922
	29.63	99.3047		29.65	99.7431		52.28	98.6873
	29.63	99.2974		29.65	99.7369		52.37	98.6762
	29.63	99.2974		29.67	99.7369		52.45	98.6768
	29.62	99.2974		29.65	99.7369		52.52	98.6694
	29.62	99.2974		29.66	99.7338		52.59	98.6645
	29.63	99.2974		29.64	99.7338		52.67	98.6645
	29.64	99.2974		29.68	99.7338		52.76	98.6553
	29.63	99.29		29.66	99.7369		52.82	98.6442
	29.63	99.2974		29.65	99.7338		52.89	98.6454
	29.62	99.29		29.65	99.7338		52.96	98.6381
	29.62	99.29		29.66	99.7338		53.05	98.635
	29.62	99.29		29.67	99.7338		53.13	98.6276
	29.62	99.29		29.65	99.7338		53.21	98.6221
	29.63	99.2974		29.66	99.7338		53.29	98.6178
	29.63	99.29		29.67	99.7338		53.37	98.6135
	29.64	99.2974		29.66	99.7338		53.45	98.6073
	29.64	99.29		29.65	99.7338		53.51	98.6061
	29.64	99.29		29.65	99.7307		53.6	98.5907
	29.63	99.29		29.64	99.7307		53.67	98.5858
	29.62	99.29		29.64	99.7338		53.76	98.5895
	29.63	99.2827		29.64	99.7307		53.82	98.5772
	29.63	99.2827		29.65	99.7307		53.9	98.5802
	29.64	99.2827		29.65	99.7307		53.98	98.5692
	29.62	99.2827		29.63	99.7307		54.07	98.5655
	29.64	99.2827		29.64	99.7307		54.12	98.5532
	29.64	99.2827		29.64	99.7307		54.2	98.5483
	29.64	99.2827		29.63	99.7307		54.29	98.5458
	29.64	99.2827		29.64	99.7307		54.36	98.5378
	29.63	99.2754		29.63	99.7276		54.45	98.5329
	29.64	99.2754		29.63	99.7276		54.53	98.5267
	29.64	99.2754		29.64	99.7276		54.61	98.5237
	29.62	99.2754		29.64	99.7245		54.68	98.5181
	29.64	99.2754		29.64	99.7245		54.75	98.5101
	29.64	99.2754		29.63	99.7276		54.83	98.5027
	29.64	99.2754		29.63	99.7183		54.92	98.496
	29.62	99.2681		29.62	99.7059		55.01	98.4923
	29.64	99.2681		29.63	99.7059		55.06	98.488
	29.66	99.2681		29.63	99.7028		55.14	98.4843
	29.65	99.2681		29.64	99.6997		55.22	98.4707
	29.64	99.2681		29.63	99.7028		55.29	98.4677
	29.63	99.2681		29.64	99.6997		55.38	98.4615
	29.63	99.2681		29.63	99.6966		55.46	98.456
	29.64	99.2681		29.62	99.6904		55.53	98.4498
	29.63	99.2681		29.62	99.6873		55.6	98.4517
	29.64	99.2681		29.63	99.6842		55.7	98.4381
	29.65	99.2608		29.62	99.6842		55.77	98.4394
	29.64	99.2608		29.63	99.6842		55.85	98.4301
	29.65	99.2608		29.62	99.6842		55.92	98.4222
	29.65	99.2608		29.62	99.6842		55.99	98.416
	29.65	99.2608		29.6	99.6873		56.06	98.4129
	29.64	99.2608		29.61	99.6811		56.15	98.3975
	29.63	99.2608		29.62	99.6873		56.23	98.4
	29.64	99.2608		29.61	99.6873		56.31	98.3945
	29.64	99.2608		29.63	99.6842		56.38	98.3865
	29.66	99.2608		29.61	99.6842		56.46	98.3791
	29.63	99.2535		29.61	99.6873		56.54	98.376
	29.64	99.2535		29.63	99.6842		56.62	98.3625
	29.64	99.2535		29.62	99.6842		56.7	98.3625
	29.64	99.2461		29.62	99.6842		56.78	98.3576
	29.64	99.2535		29.61	99.6842		56.85	98.3446
	29.64	99.2461		29.62	99.6842		56.93	98.344
	29.65	99.2461		29.61	99.6873		57.01	98.336
	29.66	99.2461		29.6	99.6811		57.11	98.3323
	29.65	99.2535		29.6	99.6842		57.17	98.3188
	29.65	99.2461		29.61	99.6842		57.25	98.3163
	29.65	99.2535		29.61	99.6842		57.34	98.312
	29.65	99.2535		29.61	99.6873		57.41	98.3053
	29.64	99.2535		29.6	99.6873		57.5	98.2979
	29.65	99.2535		29.61	99.6873		57.58	98.2917
	29.67	99.2461		29.62	99.6873		57.64	98.293
	29.65	99.2461		29.61	99.6873		57.71	98.285
	29.64	99.2535		29.61	99.6873		57.8	98.2745
	29.64	99.2535		29.6	99.6873		57.88	98.2714
	29.65	99.2461		29.6	99.6873		57.95	98.2604
	29.66	99.2461		29.61	99.6904		58.03	98.2561
	29.64	99.2461		29.6	99.6873		58.11	98.2468
	29.65	99.2461		29.61	99.6873		58.18	98.2438
	29.66	99.2461		29.62	99.6873		58.28	98.2358
	29.66	99.2388		29.6	99.6873		58.35	98.2333
	29.66	99.2388		29.59	99.6873		58.43	98.229
	29.65	99.2388		29.59	99.6873		58.51	98.2161
	29.66	99.2388		29.6	99.6873		58.59	98.2142
	29.65	99.2388		29.59	99.6873		58.65	98.2093
	29.66	99.2315		29.6	99.6873		58.74	98.1958
	29.65	99.2315		29.59	99.6873		58.82	98.1946
	29.65	99.2388		29.6	99.6873		58.88	98.1859
	29.65	99.2315		29.61	99.6873		58.98	98.1773
	29.64	99.2315		29.58	99.6873		59.05	98.1687
	29.65	99.2315		29.58	99.6873		59.12	98.1656
	29.67	99.2315		29.6	99.6873		59.21	98.1656
	29.66	99.2315		29.59	99.6842		59.28	98.1558
	29.65	99.2242		29.59	99.6842		59.37	98.1472
	29.65	99.2242		29.58	99.6842		59.44	98.1337
	29.66	99.2242		29.59	99.6842		59.52	98.1367
	29.67	99.2242		29.58	99.6842		59.6	98.1281
	29.66	99.2242		29.57	99.6873		59.69	98.1195
	29.66	99.2242		29.58	99.6873		59.76	98.1201
	29.66	99.2242		29.58	99.6873		59.84	98.1041
	29.66	99.2242		29.59	99.6904		59.92	98.1017
	29.65	99.2242		29.57	99.6904		60.01	98.0918
	29.66	99.2242		29.57	99.6904		60.09	98.0887
	29.67	99.2242		29.58	99.6904		60.17	98.0795
	29.66	99.2242		29.59	99.6935		60.26	98.0752
	29.67	99.2169		29.58	99.6966		60.33	98.0684
	29.66	99.2169		29.56	99.6997		60.4	98.0611
	29.65	99.2242		29.57	99.6997		60.49	98.0524
	29.66	99.2242		29.58	99.6997		60.55	98.0512
	29.66	99.2169		29.57	99.6997		60.64	98.0414
	29.67	99.2242		29.58	99.6997		60.72	98.0328
	29.66	99.2242		29.57	99.6997		60.8	98.0303
	29.65	99.2169		29.57	99.6997		60.89	98.0211
	29.65	99.2169		29.56	99.6997		60.97	98.01
	29.65	99.2169		29.57	99.6997		61.06	98.0069
	29.67	99.2169		29.57	99.6966		61.13	98.0002
	29.66	99.2242		29.57	99.6997		61.2	97.9922
	29.66	99.2169		29.56	99.6966		61.29	97.9805
	29.64	99.2169		29.57	99.6997		61.35	97.9829
	29.67	99.2169		29.57	99.6966		61.44	97.97
	29.67	99.2169		29.57	99.6966		61.52	97.9633
	29.67	99.2169		29.56	99.6966		61.61	97.9577
	29.65	99.2169		29.56	99.6966		61.68	97.9485
	29.66	99.2169		29.56	99.6997		61.77	97.9411
	29.65	99.2242		29.55	99.6966		61.85	97.9386
	29.66	99.2242		29.55	99.6997		61.92	97.9368
	29.67	99.2169		29.56	99.6966		62.01	97.9239
	29.67	99.2169		29.56	99.6966		62.08	97.9227
	29.67	99.2242		29.55	99.6997		62.16	97.9042
	29.67	99.2242		29.57	99.6997		62.24	97.9067
	29.67	99.2242		29.55	99.6997		62.32	97.9067
	29.67	99.2169		29.57	99.6997		62.41	97.895
	29.66	99.2242		29.57	99.6997		62.48	97.8857
	29.66	99.2242		29.57	99.6997		62.56	97.8814
	29.66	99.2242		29.55	99.6997		62.65	97.8648
	29.67	99.2242		29.56	99.6997		62.72	97.8611
	29.67	99.2242		29.56	99.7028		62.8	97.8636
	29.67	99.2242		29.53	99.7028		62.88	97.8464
	29.67	99.2242		29.56	99.7028		62.96	97.8451
	29.67	99.2242		29.55	99.7028		63.05	97.8371
	29.68	99.2242		29.56	99.7028		63.13	97.8248
	29.68	99.2242		29.56	99.7028		63.21	97.8187
	29.66	99.2242		29.54	99.6997		63.28	97.8193
	29.67	99.2242		29.56	99.7028		63.37	97.8089
	29.68	99.2242		29.56	99.7028		63.45	97.8008
	29.7	99.2242		29.55	99.7028		63.51	97.7904
	29.67	99.2242		29.54	99.7059		63.6	97.7855
	29.68	99.2242		29.55	99.7028		63.69	97.7763
	29.67	99.2242		29.54	99.7028		63.78	97.7701
	29.67	99.2315		29.56	99.7059		63.85	97.7596
	29.68	99.2242		29.56	99.7059		63.92	97.7553
	29.68	99.2242		29.55	99.7028		64.01	97.751
	29.69	99.2315		29.56	99.7028		64.09	97.7406
	29.68	99.2242		29.55	99.7028		64.17	97.7357
	29.67	99.2242		29.56	99.7028		64.25	97.7295
	29.69	99.2242		29.56	99.7028		64.32	97.7197
	29.67	99.2242		29.56	99.7028		64.42	97.716
	29.69	99.2242		29.54	99.7028		64.5	97.7049
	29.7	99.2242		29.57	99.7059		64.57	97.7024
	29.69	99.2242		29.55	99.7059		64.64	97.6914
	29.68	99.2242		29.55	99.7059		64.74	97.6877
	29.69	99.2242		29.55	99.7059		64.82	97.6791
	29.7	99.2242		29.55	99.7059		64.9	97.6698
	29.7	99.2242		29.57	99.7059		64.98	97.6631
	29.7	99.2242		29.56	99.7059		65.07	97.66
	29.71	99.2242		29.56	99.7059		65.15	97.6465
	29.7	99.2242		29.56	99.7059		65.22	97.6415
	29.7	99.2242		29.56	99.7059		65.31	97.6311
	29.72	99.2242		29.56	99.7059		65.41	97.6268
	29.72	99.2242		29.55	99.7059		65.48	97.6261
	29.71	99.2242		29.55	99.709		65.56	97.6182
	29.72	99.2242		29.55	99.7059		65.65	97.6071
	29.72	99.2242		29.56	99.709		65.71	97.6059
	29.72	99.2242		29.56	99.709		65.8	97.5991
	29.73	99.2315		29.57	99.709		65.86	97.5862
	29.72	99.2315		29.57	99.709		65.95	97.5776
	29.72	99.2315		29.57	99.709		66.05	97.561
	29.71	99.2315		29.58	99.709		66.11	97.5616
	29.74	99.2315		29.58	99.709		66.18	97.5517
	29.74	99.2315		29.59	99.709		66.27	97.5443
	29.73	99.2315		29.59	99.7121		66.36	97.5333
	29.74	99.2315		29.57	99.7121		66.44	97.5314
	29.74	99.2315		29.58	99.7121		66.51	97.5283
	29.74	99.2315		29.59	99.7121		66.61	97.5111
	29.74	99.2315		29.59	99.7121		66.67	97.5105
	29.75	99.2315		29.59	99.7121		66.76	97.505
	29.75	99.2315		29.59	99.7152		66.85	97.4957
	29.75	99.2315		29.6	99.7121		66.92	97.4847
	29.74	99.2315		29.6	99.7152		67.01	97.4767
	29.74	99.2388		29.59	99.7152		67.09	97.4724
	29.78	99.2388		29.58	99.7152		67.16	97.4631
	29.78	99.2388		29.58	99.7152		67.25	97.4527
	29.75	99.2461		29.59	99.7121		67.33	97.4502
	29.77	99.2388		29.59	99.7121		67.42	97.4447
	29.78	99.2388		29.59	99.709		67.51	97.4318
	29.78	99.2388		29.61	99.709		67.58	97.4182
	29.78	99.2388		29.62	99.709		67.66	97.4176
	29.77	99.2388		29.62	99.709		67.74	97.4121
	29.8	99.2461		29.6	99.709		67.83	97.4022
	29.8	99.2461		29.61	99.709		67.91	97.3924
	29.8	99.2461		29.62	99.709		68	97.3813
	29.79	99.2461		29.63	99.709		68.07	97.3801
	29.81	99.2461		29.62	99.709		68.15	97.3776
	29.81	99.2461		29.62	99.709		68.23	97.3616
	29.8	99.2461		29.63	99.7121		68.31	97.3555
	29.81	99.2461		29.63	99.709		68.39	97.35
	29.83	99.2461		29.64	99.709		68.48	97.3413
	29.83	99.2535		29.65	99.7121		68.55	97.3376
	29.82	99.2535		29.66	99.7121		68.64	97.3297
	29.82	99.2535		29.65	99.709		68.73	97.3235
	29.85	99.2535		29.65	99.7121		68.8	97.3167
	29.85	99.2535		29.64	99.7152		68.89	97.3075
	29.83	99.2535		29.66	99.7121		68.96	97.3001
	29.84	99.2535		29.66	99.7121		69.05	97.2866
	29.86	99.2535		29.63	99.7121		69.12	97.2798
	29.87	99.2535		29.66	99.7121		69.21	97.2768
	29.85	99.2535		29.67	99.7121		69.3	97.2632
	29.85	99.2535		29.68	99.7121		69.38	97.254
	29.86	99.2535		29.68	99.7121		69.46	97.2521
	29.89	99.2608		29.66	99.7152		69.54	97.2454
	29.88	99.2535		29.68	99.7121		69.64	97.2423
	29.89	99.2608		29.68	99.7121		69.71	97.2288
	29.9	99.2608		29.7	99.7121		69.78	97.222
	29.88	99.2608		29.69	99.7152		69.86	97.2165
	29.88	99.2608		29.7	99.7121		69.95	97.206
	29.9	99.2608		29.69	99.7121		70.03	97.1962
	29.91	99.2608		29.7	99.7121		70.11	97.1888
	29.92	99.2608		29.71	99.7121		70.19	97.1826
	29.91	99.2608		29.72	99.7121		70.27	97.174
	29.91	99.2608		29.72	99.709		70.35	97.1728
	29.94	99.2681		29.7	99.709		70.44	97.1556
	29.94	99.2681		29.71	99.709		70.52	97.15
	29.94	99.2608		29.72	99.709		70.62	97.1457
	29.94	99.2608		29.74	99.709		70.68	97.1371
	29.96	99.2681		29.72	99.709		70.77	97.1316
	29.95	99.2681		29.73	99.709		70.86	97.1273
	29.95	99.2681		29.74	99.709		70.93	97.1094
	29.94	99.2681		29.75	99.709		71.01	97.1014
	29.97	99.2681		29.75	99.709		71.11	97.0947
	29.97	99.2681		29.74	99.709		71.18	97.0879
	29.97	99.2681		29.75	99.7059		71.27	97.0873
	29.97	99.2681		29.78	99.7059		71.35	97.0713
	29.99	99.2681		29.76	99.7059		71.43	97.0627
	29.99	99.2681		29.78	99.709		71.51	97.0565
	30	99.2754		29.78	99.709		71.6	97.0516
	30.01	99.2754		29.77	99.709		71.7	97.0455
	30.01	99.2754		29.76	99.7059		71.77	97.0368
	30.02	99.2681		29.79	99.709		71.85	97.0289
	30.01	99.2681		29.81	99.7059		71.94	97.0141
	30.02	99.2681		29.81	99.7059		72	97.0129
	30.04	99.2754		29.79	99.7059		72.09	97.0067
	30.03	99.2754		29.8	99.7059		72.18	96.9938
	30.05	99.2754		29.83	99.7059		72.25	96.9821
	30.06	99.2754		29.83	99.7059		72.34	96.9809
	30.05	99.2754		29.82	99.7059		72.42	96.9716
	30.06	99.2754		29.82	99.6997		72.49	96.9624
	30.07	99.2754		29.83	99.6966		72.59	96.96
	30.08	99.2754		29.84	99.6997		72.68	96.9452
	30.08	99.2754		29.83	99.6935		72.77	96.9409
	30.09	99.2754		29.83	99.6873		72.85	96.9347
	30.09	99.2754		29.85	99.6842		72.93	96.9224
	30.11	99.2754		29.86	99.6811		73.01	96.9138
	30.11	99.2754		29.86	99.6811		73.1	96.9021
	30.11	99.2754		29.88	99.6811		73.18	96.8991
	30.11	99.2754		29.87	99.678		73.25	96.8898
	30.11	99.2754		29.88	99.6811		73.35	96.8794
	30.12	99.2754		29.88	99.678		73.43	96.8744
	30.13	99.2754		29.88	99.6811		73.5	96.8665
	30.14	99.2754		29.9	99.6811		73.59	96.856
	30.16	99.2754		29.89	99.6842		73.67	96.8474
	30.16	99.2827		29.89	99.6842		73.74	96.8455
	30.15	99.2827		29.91	99.6842		73.85	96.8357
	30.15	99.2827		29.93	99.6873		73.93	96.824
	30.19	99.2827		29.92	99.6904		74.01	96.8203
	30.19	99.2827		29.92	99.6873		74.09	96.8092
	30.2	99.2827		29.93	99.6904		74.17	96.7988
	30.21	99.2827		29.94	99.6904		74.25	96.7951
	30.2	99.2827		29.95	99.6935		74.35	96.7902
	30.18	99.2827		29.94	99.6935		74.43	96.7772
	30.2	99.29		29.96	99.6966		74.51	96.7674
	30.21	99.2827		29.96	99.6966		74.59	96.7699
	30.22	99.2827		29.97	99.6966		74.68	96.7557
	30.23	99.29		29.98	99.6966		74.78	96.749
	30.24	99.2827		29.97	99.6966		74.86	96.7366
	30.24	99.29		29.98	99.6966		74.93	96.7311
	30.25	99.29		30	99.6966		75.03	96.7256
	30.27	99.29		29.99	99.6966		75.1	96.7164
	30.27	99.29		30.01	99.6966		75.17	96.7053
	30.27	99.29		30.01	99.6935		75.25	96.7016
	30.29	99.29		30.01	99.6935		75.35	96.6905
	30.29	99.29		30.02	99.6935		75.42	96.6825
	30.29	99.29		30.02	99.6935		75.5	96.6745
	30.29	99.29		30.04	99.6904		75.59	96.6684
	30.32	99.29		30.02	99.6935		75.68	96.6598
	30.32	99.29		30.03	99.6904		75.75	96.6518
	30.32	99.29		30.05	99.6935		75.84	96.6395
	30.34	99.2974		30.06	99.6904		75.94	96.6395
	30.34	99.29		30.07	99.6935		76.02	96.6272
	30.34	99.29		30.07	99.6904		76.11	96.6198
	30.35	99.29		30.07	99.6935		76.18	96.6032
	30.36	99.29		30.08	99.6935		76.27	96.6013
	30.39	99.29		30.07	99.6997		76.35	96.5939
	30.38	99.2974		30.09	99.7028		76.43	96.5823
	30.38	99.2974		30.09	99.7121		76.52	96.5761
	30.39	99.29		30.09	99.7214		76.59	96.5669
	30.4	99.29		30.11	99.7183		76.7	96.5632
	30.42	99.2974		30.12	99.7214		76.76	96.554
	30.42	99.2974		30.13	99.7183		76.85	96.5472
	30.42	99.2974		30.13	99.7183		76.93	96.5374
	30.44	99.2974		30.14	99.7214		77.02	96.5306
	30.44	99.2974		30.14	99.7245		77.1	96.5238
	30.44	99.2974		30.16	99.7214		77.19	96.5078
	30.44	99.2974		30.15	99.7214		77.27	96.5084
	30.47	99.2974		30.16	99.7276		77.35	96.4937
	30.47	99.2974		30.16	99.7214		77.43	96.4912
	30.47	99.2974		30.17	99.7245		77.52	96.4808
	30.48	99.2974		30.18	99.7214		77.61	96.4721
	30.49	99.2974		30.19	99.7214		77.7	96.4666
	30.51	99.2974		30.2	99.7245		77.79	96.4592
	30.51	99.2974		30.21	99.7307		77.87	96.4518
	30.5	99.2974		30.21	99.7276		77.95	96.442
	30.53	99.2974		30.22	99.7152		78.03	96.4315
	30.54	99.2974		30.22	99.7276		78.12	96.4279
	30.53	99.2974		30.23	99.7307		78.2	96.4229
	30.53	99.2974		30.24	99.7338		78.27	96.4069
	30.56	99.2974		30.24	99.7369		78.36	96.3965
	30.57	99.2974		30.26	99.7307		78.44	96.4002
	30.56	99.2974		30.26	99.7307		78.54	96.3792
	30.56	99.29		30.26	99.7369		78.62	96.3762
	30.6	99.29		30.28	99.7276		78.69	96.3657
	30.61	99.29		30.28	99.7245		78.79	96.3596
	30.6	99.2974		30.3	99.7276		78.88	96.3473
	30.61	99.2974		30.3	99.7245		78.97	96.346
	30.63	99.2974		30.31	99.7276		79.03	96.33
	30.64	99.29		30.3	99.7276		79.13	96.3251
	30.63	99.29		30.31	99.7307		79.22	96.3208
	30.64	99.29		30.32	99.7307		79.29	96.3116
	30.66	99.29		30.32	99.7307		79.38	96.2999
	30.67	99.2974		30.34	99.7307		79.46	96.2974
	30.66	99.29		30.36	99.7276		79.54	96.2919
	30.67	99.2974		30.36	99.7307		79.63	96.2765
	30.69	99.2974		30.37	99.7493		79.71	96.2685
	30.68	99.2974		30.36	99.7896		79.79	96.2624
	30.71	99.2974		30.37	99.8113		79.89	96.2532
	30.7	99.29		30.39	99.8113		79.97	96.247
	30.72	99.2974		30.39	99.8082		80.06	96.2408
	30.72	99.29		30.39	99.8051		80.14	96.2335
	30.74	99.29		30.41	99.8051		80.23	96.2255
	30.74	99.2974		30.42	99.7989		80.31	96.2125
	30.74	99.2974		30.43	99.7989		80.39	96.2039
	30.76	99.2974		30.42	99.802		80.48	96.1972
	30.77	99.2974		30.44	99.8051		80.58	96.1873
	30.78	99.2974		30.46	99.8113		80.66	96.1892
	30.78	99.29		30.45	99.8113		80.74	96.1769
	30.79	99.2974		30.46	99.8144		80.82	96.1615
	30.8	99.2974		30.49	99.8175		80.9	96.159
	30.81	99.2974		30.49	99.8237		80.99	96.151
	30.83	99.2974		30.48	99.8299		81.07	96.1424
	30.83	99.29		30.48	99.8361		81.17	96.1295
	30.84	99.2974		30.51	99.8392		81.25	96.1264
	30.85	99.2974		30.51	99.8485		81.35	96.1184
	30.87	99.2974		30.5	99.833		81.42	96.1086
	30.86	99.2974		30.53	99.8237		81.53	96.1006
	30.88	99.2974		30.53	99.8051		81.6	96.0938
	30.89	99.29		30.55	99.8051		81.68	96.0883
	30.89	99.29		30.53	99.8113		81.77	96.0754
	30.91	99.2974		30.56	99.8144		81.86	96.0748
	30.92	99.2974		30.6	99.8175		81.94	96.0618
	30.92	99.29		30.58	99.8237		82.01	96.0563
	30.94	99.29		30.57	99.833		82.1	96.0465
	30.92	99.29		30.6	99.8423		82.18	96.0348
	30.95	99.29		30.61	99.8485		82.27	96.0335
	30.96	99.29		30.61	99.8268		82.37	96.0237
	30.97	99.29		30.6	99.7369		82.45	96.0089
	30.97	99.2974		30.62	99.678		82.52	96.0071
	30.98	99.2974		30.65	99.585		82.62	95.9936
	30.99	99.2974		30.64	99.5355		82.71	95.9936
	31.01	99.29		30.65	99.5076		82.78	95.9788
	31	99.29		30.66	99.489		82.89	95.9751
	31.01	99.29		30.67	99.52		82.97	95.9616
	31.03	99.29		30.66	99.52		83.05	95.9628
	31.05	99.29		30.68	99.5355		83.14	95.9505
	31.05	99.29		30.7	99.5478		83.22	95.94
	31.06	99.29		30.71	99.5757		83.31	95.9413
	31.06	99.29		30.71	99.6284		83.4	95.932
	31.08	99.29		30.72	99.6687		83.48	95.9154
	31.09	99.29		30.73	99.6904		83.56	95.9105
	31.11	99.29		30.73	99.6873		83.64	95.9074
	31.12	99.29		30.74	99.6811		83.72	95.8982
	31.13	99.29		30.75	99.6842		83.82	95.889
	31.12	99.29		30.76	99.6966		83.92	95.8822
	31.13	99.29		30.78	99.6966		83.99	95.8705
	31.17	99.29		30.77	99.7059		84.07	95.8619
	31.15	99.29		30.78	99.7121		84.15	95.8533
	31.15	99.29		30.8	99.7152		84.25	95.8496
	31.17	99.29		30.81	99.7245		84.34	95.8392
	31.21	99.2827		30.83	99.7245		84.4	95.8312
	31.19	99.29		30.82	99.7214		84.51	95.8238
	31.19	99.29		30.84	99.7276		84.6	95.8133
	31.2	99.29		30.84	99.7245		84.67	95.809
	31.24	99.29		30.84	99.7214		84.76	95.8016
	31.23	99.29		30.85	99.7493		84.85	95.7918
	31.25	99.29		30.86	99.8144		84.93	95.7844
	31.26	99.29		30.88	99.8423		85.02	95.7789
	31.27	99.29		30.89	99.8454		85.11	95.7678
	31.26	99.2827		30.89	99.8547		85.19	95.7586
	31.27	99.2827		30.9	99.8702		85.28	95.7549
	31.29	99.2827		30.91	99.8795		85.37	95.7407
	31.31	99.29		30.92	99.864		85.46	95.7377
	31.32	99.2827		30.92	99.8206		85.54	95.7297
	31.32	99.2827		30.94	99.7865		85.62	95.7223
	31.33	99.29		30.95	99.7803		85.72	95.7112
	31.34	99.29		30.96	99.771		85.79	95.705
	31.36	99.2827		30.96	99.7679		85.89	95.6989
	31.35	99.2827		30.98	99.7648		85.96	95.686
	31.37	99.2827		30.99	99.7617		86.07	95.6768
	31.37	99.2827		31	99.7586		86.13	95.6718
	31.4	99.2827		31.01	99.7524		86.22	95.6694
	31.39	99.2827		31.01	99.7493		86.31	95.6528
	31.42	99.2827		31.02	99.7493		86.4	95.6472
	31.43	99.2827		31.03	99.7462		86.48	95.638
	31.43	99.2827		31.04	99.7431		86.57	95.6306
	31.45	99.2827		31.05	99.74		86.66	95.6251
	31.45	99.2827		31.06	99.74		86.74	95.6152
	31.46	99.2827		31.07	99.7369		86.85	95.6097
	31.48	99.2827		31.08	99.7369		86.93	95.606
	31.48	99.29		31.08	99.7338		87.01	95.5943
	31.49	99.2827		31.08	99.7307		87.1	95.5876
	31.51	99.29		31.1	99.7307		87.17	95.5716
	31.52	99.29		31.12	99.7307		87.26	95.5697
	31.53	99.29		31.14	99.7276		87.36	95.5605
	31.53	99.2827		31.13	99.7276		87.44	95.5519
	31.55	99.29		31.13	99.7276		87.53	95.542
	31.57	99.29		31.13	99.7245		87.62	95.5426
	31.57	99.29		31.16	99.7121		87.71	95.5273
	31.56	99.29		31.18	99.7059		87.79	95.5199
	31.59	99.29		31.17	99.7028		87.87	95.5199
	31.6	99.29		31.2	99.6997		87.97	95.4996
	31.61	99.29		31.2	99.6997		88.05	95.4953
	31.63	99.29		31.23	99.6997		88.15	95.4934
	31.63	99.2827		31.22	99.6997		88.23	95.4836
	31.63	99.2827		31.23	99.6966		88.32	95.4781
	31.66	99.29		31.25	99.6966		88.41	95.4682
	31.68	99.29		31.25	99.6966		88.5	95.4571
	31.68	99.2827		31.26	99.6935		88.57	95.4479
	31.68	99.29		31.28	99.6966		88.67	95.4485
	31.68	99.29		31.28	99.6966		88.76	95.4381
	31.7	99.29		31.3	99.6935		88.82	95.4295
	31.72	99.29		31.3	99.6935		88.91	95.4202
	31.72	99.29		31.32	99.6935		89.01	95.411
	31.72	99.29		31.32	99.6966		89.1	95.4067
	31.74	99.29		31.34	99.6935		89.18	95.4049
	31.76	99.29		31.34	99.6935		89.27	95.3876
	31.76	99.29		31.37	99.6935		89.36	95.3827
	31.79	99.29		31.37	99.6935		89.45	95.3729
	31.8	99.29		31.38	99.6935		89.53	95.3686
	31.81	99.29		31.37	99.6966		89.63	95.3569
	31.81	99.29		31.38	99.6966		89.72	95.3495
	31.82	99.29		31.4	99.6966		89.81	95.3409
	31.83	99.29		31.43	99.6966		89.9	95.3378
	31.86	99.29		31.43	99.6997		89.97	95.3354
	31.84	99.29		31.43	99.6966		90.06	95.3249
	31.85	99.2974		31.44	99.6966		90.15	95.3132
	31.87	99.2974		31.45	99.6997		90.23	95.3046
	31.9	99.29		31.46	99.6966		90.32	95.2947
	31.9	99.29		31.46	99.6966		90.42	95.2905
	31.89	99.29		31.48	99.6966		90.5	95.2812
	31.91	99.29		31.5	99.6935		90.6	95.2775
	31.93	99.29		31.52	99.6966		90.69	95.2689
	31.93	99.29		31.51	99.6935		90.76	95.2615
	31.95	99.29		31.52	99.6935		90.84	95.2517
	31.97	99.29		31.55	99.6935		90.93	95.2492
	31.98	99.2827		31.55	99.6935		91.01	95.2345
	31.98	99.2827		31.54	99.6935		91.11	95.2296
	32	99.29		31.56	99.6935		91.19	95.2191
	32	99.2827		31.59	99.6935		91.27	95.2166
	32.02	99.2827		31.6	99.6935		91.37	95.2062
	32.03	99.29		31.58	99.6935		91.46	95.2025
	32.04	99.2827		31.6	99.6935		91.54	95.1976
	32.05	99.2827		31.63	99.6935		91.63	95.184
	32.06	99.2827		31.63	99.6935		91.73	95.1816
	32.08	99.2827		31.62	99.6935		91.82	95.1754
	32.08	99.2827		31.66	99.6935		91.91	95.1668
	32.09	99.2827		31.65	99.6935		91.97	95.1526
	32.1	99.2827		31.67	99.6935		92.08	95.1483
	32.13	99.2827		31.68	99.6935		92.15	95.1471
	32.15	99.2827		31.69	99.6935		92.26	95.1311
	32.13	99.2827		31.7	99.6935		92.34	95.1262
	32.16	99.2827		31.72	99.6935		92.42	95.1201
	32.17	99.2827		31.72	99.6935		92.5	95.109
	32.18	99.2827		31.73	99.6904		92.6	95.1053
	32.19	99.2827		31.75	99.6935		92.69	95.093
	32.2	99.2827		31.75	99.6935		92.77	95.0918
	32.21	99.2827		31.75	99.6935		92.87	95.0844
	32.23	99.2827		31.77	99.6904		92.97	95.0745
	32.23	99.2827		31.78	99.6904		93.06	95.0653
	32.24	99.2827		31.79	99.6904		93.14	95.0548
	32.26	99.2827		31.8	99.6904		93.22	95.0548
	32.28	99.29		31.81	99.6904		93.31	95.0469
	32.28	99.2827		31.83	99.6904		93.39	95.0315
	32.29	99.2827		31.84	99.6904		93.5	95.029
	32.3	99.29		31.83	99.6935		93.58	95.0309
	32.32	99.29		31.85	99.6904		93.67	95.0161
	32.32	99.29		31.89	99.6904		93.77	95.005
	32.32	99.29		31.89	99.6904		93.84	95.0087
	32.34	99.2827		31.9	99.6904		93.93	94.989
	32.36	99.2827		31.91	99.6904		94.03	94.9866
	32.38	99.2827		31.92	99.6904		94.11	94.9823
	32.38	99.2827		31.93	99.6904		94.2	94.9693
	32.4	99.2827		31.93	99.6904		94.28	94.9583
	32.41	99.2827		31.94	99.6904		94.36	94.9607
	32.42	99.2827		31.96	99.6904		94.46	94.9497
	32.43	99.2827		31.96	99.6904		94.55	94.9398
	32.43	99.2827		31.98	99.6904		94.63	94.9343
	32.46	99.2827		32	99.6873		94.72	94.9318
	32.47	99.2827		32.01	99.6904		94.82	94.925
	32.47	99.2827		32.02	99.6904		94.91	94.9171
	32.48	99.2827		32.02	99.6873		94.99	94.906
	32.51	99.2827		32.03	99.6873		95.09	94.9023
	32.52	99.2827		32.04	99.6873		95.18	94.8894
	32.54	99.2827		32.05	99.6873		95.25	94.8838
	32.53	99.2827		32.07	99.6873		95.34	94.8801
	32.56	99.2827		32.08	99.6873		95.43	94.8709
	32.57	99.29		32.09	99.6842		95.53	94.8678
	32.57	99.2827		32.11	99.6873		95.61	94.8598
	32.58	99.2827		32.12	99.6842		95.7	94.8488
	32.62	99.2827		32.12	99.6842		95.78	94.8451
	32.63	99.2827		32.14	99.6873		95.89	94.8383
	32.62	99.2827		32.14	99.6842		95.96	94.8328
	32.63	99.2827		32.16	99.6842		96.06	94.8199
	32.65	99.2827		32.17	99.6842		96.14	94.8211
	32.68	99.2827		32.19	99.6842		96.24	94.8168
	32.66	99.2754		32.2	99.6842		96.31	94.8045
	32.66	99.2754		32.22	99.6842		96.41	94.7977
	32.7	99.2754		32.22	99.6842		96.51	94.7836
	32.71	99.2754		32.23	99.6842		96.59	94.7848
	32.71	99.2754		32.23	99.6842		96.68	94.7786
	32.73	99.2681		32.25	99.6842		96.76	94.7608
	32.76	99.2681		32.27	99.6811		96.87	94.7682
	32.77	99.2754		32.26	99.6842		96.95	94.7546
	32.77	99.2754		32.29	99.6811		97.04	94.7491
	32.78	99.2681		32.31	99.6842		97.14	94.7448
	32.8	99.2681		32.33	99.6842		97.22	94.735
	32.81	99.2681		32.32	99.6811		97.31	94.7251
	32.81	99.2681		32.33	99.6811		97.41	94.7196
	32.83	99.2681		32.36	99.6811		97.48	94.719
	32.85	99.2681		32.36	99.6811		97.57	94.7067
	32.85	99.2681		32.37	99.6811		97.68	94.7018
	32.86	99.2681		32.38	99.6811		97.75	94.6944
	32.88	99.2681		32.39	99.6811		97.84	94.6821
	32.9	99.2681		32.4	99.678		97.94	94.6827
	32.92	99.2681		32.42	99.6811		98.03	94.6722
	32.91	99.2681		32.43	99.6811		98.12	94.6648
	32.94	99.2681		32.43	99.6811		98.21	94.6556
	32.95	99.2608		32.46	99.6811		98.3	94.6593
	32.95	99.2608		32.48	99.678		98.38	94.6384
	32.98	99.2608		32.48	99.6811		98.48	94.6359
	32.99	99.2608		32.49	99.6811		98.57	94.6335
	32.99	99.2608		32.5	99.678		98.64	94.6242
	33.01	99.2608		32.51	99.678		98.75	94.6181
	33.02	99.2608		32.53	99.6811		98.82	94.6181
	33.03	99.2608		32.52	99.678		98.92	94.6144
	33.04	99.2608		32.55	99.678		98.99	94.5947
	33.04	99.2608		32.56	99.678		99.09	94.5947
	33.07	99.2608		32.57	99.678		99.2	94.5818
	33.08	99.2608		32.58	99.678		99.28	94.5849
	33.08	99.2608		32.58	99.6811		99.35	94.572
	33.09	99.2608		32.61	99.678		99.44	94.5683
	33.11	99.2608		32.61	99.678		99.55	94.5584
	33.12	99.2608		32.63	99.678		99.63	94.5541
	33.14	99.2608		32.64	99.678		99.72	94.5418
	33.16	99.2608		32.66	99.678		99.81	94.5437
	33.17	99.2535		32.69	99.678		99.91	94.5344
	33.17	99.2608		32.69	99.6749		100	94.5295
	33.2	99.2535		32.68	99.6749		100.09	94.5246
	33.2	99.2535		32.72	99.6749		100.17	94.5141
	33.22	99.2535		32.73	99.6749		100.27	94.508
	33.23	99.2535		32.72	99.6749		100.36	94.5043
	33.24	99.2535		32.72	99.6749		100.43	94.4951
	33.25	99.2535		32.75	99.6749		100.53	94.4852
	33.28	99.2535		32.76	99.6749		100.62	94.4815
	33.29	99.2535		32.77	99.6749		100.7	94.4766
	33.29	99.2535		32.79	99.6749		100.79	94.4735
	33.31	99.2535		32.81	99.6718		100.89	94.4668
	33.32	99.2535		32.82	99.6749		100.97	94.4612
	33.34	99.2535		32.83	99.6749		101.09	94.4582
	33.36	99.2461		32.83	99.6718		101.17	94.444
	33.35	99.2535		32.84	99.6749		101.26	94.4366
	33.38	99.2535		32.84	99.6749		101.35	94.4268
	33.4	99.2535		32.87	99.6718		101.44	94.4225
	33.4	99.2461		32.89	99.6718		101.53	94.4212
	33.4	99.2535		32.9	99.6718		101.62	94.4151
	33.42	99.2461		32.92	99.6687		101.72	94.4071
	33.44	99.2461		32.91	99.6718		101.81	94.3954
	33.46	99.2461		32.94	99.6718		101.89	94.396
	33.48	99.2461		32.96	99.6718		101.98	94.3911
	33.47	99.2461		32.95	99.6687		102.06	94.3868
	33.51	99.2461		32.98	99.6687		102.16	94.3751
	33.52	99.2461		32.97	99.6687		102.25	94.3671
	33.5	99.2461		33	99.6687		102.34	94.3659
	33.53	99.2388		33.01	99.6687		102.44	94.364
	33.55	99.2461		33.03	99.6687		102.53	94.3487
	33.57	99.2461		33.04	99.6656		102.62	94.3505
	33.58	99.2388		33.06	99.6656		102.72	94.345
	33.58	99.2461		33.06	99.6656		102.8	94.3333
	33.61	99.2535		33.08	99.6656		102.88	94.3253
	33.61	99.2461		33.09	99.6656		102.99	94.3228
	33.62	99.2461		33.1	99.6656		103.08	94.3173
	33.64	99.2461		33.12	99.6656		103.16	94.3099
	33.67	99.2461		33.11	99.6656		103.25	94.3136
	33.69	99.2461		33.14	99.6625		103.33	94.2994
	33.67	99.2461		33.16	99.6625		103.42	94.289
	33.69	99.2461		33.16	99.6625		103.51	94.2921
	33.72	99.2461		33.17	99.6656		103.61	94.2835
	33.73	99.2461		33.19	99.6625		103.69	94.281
	33.73	99.2388		33.21	99.6656		103.79	94.2712
	33.73	99.2461		33.21	99.6625		103.88	94.2644
	33.78	99.2461		33.21	99.6625		103.98	94.2601
	33.78	99.2461		33.23	99.6625		104.07	94.249
	33.78	99.2388		33.25	99.6625		104.17	94.2435
	33.8	99.2388		33.27	99.6656		104.26	94.2386
	33.82	99.2461		33.28	99.6625		104.34	94.2305
	33.84	99.2388		33.29	99.6625		104.43	94.2324
	33.84	99.2388		33.3	99.6594		104.52	94.2262
	33.87	99.2461		33.33	99.6594		104.62	94.2182
	33.87	99.2388		33.32	99.6563		104.72	94.2096
	33.87	99.2388		33.34	99.6594		104.79	94.2078
	33.9	99.2388		33.36	99.6594		104.88	94.2004
	33.92	99.2388		33.38	99.6563		104.97	94.1961
	33.93	99.2388		33.39	99.6563		105.07	94.1869
	33.95	99.2388		33.4	99.6563		105.16	94.1813
	33.94	99.2388		33.42	99.6563		105.25	94.1721
	33.95	99.2388		33.42	99.6563		105.34	94.1715
	33.98	99.2388		33.42	99.6594		105.43	94.1616
	33.99	99.2388		33.45	99.6563		105.53	94.1592
	34.01	99.2388		33.46	99.6563		105.62	94.15
	34.03	99.2388		33.48	99.6563		105.71	94.1444
	34.03	99.2388		33.49	99.6563		105.78	94.145
	34.04	99.2388		33.49	99.6563		105.88	94.142
	34.06	99.2388		33.52	99.6532		105.98	94.1327
	34.08	99.2388		33.53	99.6532		106.06	94.1303
	34.09	99.2388		33.53	99.6532		106.15	94.1192
	34.11	99.2388		33.55	99.6532		106.25	94.1155
	34.11	99.2388		33.56	99.6501		106.34	94.1118
	34.13	99.2388		33.58	99.6501		106.43	94.1081
	34.14	99.2388		33.6	99.6501		106.52	94.1026
	34.16	99.2388		33.6	99.6501		106.62	94.102
	34.18	99.2388		33.62	99.6501		106.71	94.0817
	34.19	99.2388		33.64	99.6501		106.8	94.0829
	34.19	99.2388		33.65	99.647		106.89	94.0761
	34.22	99.2388		33.65	99.647		106.98	94.0731
	34.22	99.2388		33.68	99.647		107.07	94.0669
	34.24	99.2388		33.7	99.647		107.16	94.0632
	34.25	99.2388		33.7	99.647		107.24	94.0546
	34.27	99.2461		33.71	99.647		107.34	94.0577
	34.28	99.2388		33.74	99.647		107.44	94.0368
	34.31	99.2388		33.74	99.6439		107.53	94.0399
	34.32	99.2388		33.74	99.647		107.63	94.0417
	34.32	99.2388		33.75	99.6439		107.7	94.0306
	34.34	99.2388		33.76	99.6439		107.79	94.0282
	34.37	99.2388		33.78	99.6439		107.9	94.0257
	34.37	99.2388		33.81	99.6439		107.98	94.0214
	34.36	99.2388		33.81	99.6439		108.07	94.0054
	34.41	99.2461		33.84	99.6408		108.17	94.0072
	34.4	99.2461		33.86	99.6408		108.26	94.0017
	34.42	99.2388		33.86	99.6408		108.37	93.9943
	34.43	99.2388		33.88	99.6408		108.45	93.9906
	34.44	99.2388		33.88	99.6408		108.54	93.9869
	34.47	99.2388		33.91	99.6377		108.64	93.9802
	34.47	99.2461		33.91	99.6377		108.72	93.9691
	34.5	99.2388		33.91	99.6408		108.8	93.9728
	34.51	99.2461		33.95	99.6377		108.9	93.9574
	34.51	99.2461		33.96	99.6346		109	93.955
	34.54	99.2461		33.96	99.6377		109.09	93.9574
	34.55	99.2461		33.98	99.6377		109.18	93.9482
	34.55	99.2461		33.99	99.6346		109.26	93.9414
	34.58	99.2388		33.99	99.6346		109.37	93.939
	34.61	99.2388		34.02	99.6346		109.46	93.9285
	34.6	99.2461		34.03	99.6346		109.56	93.9297
	34.62	99.2461		34.07	99.6346		109.65	93.9168
	34.64	99.2388		34.06	99.6315		109.74	93.9205
	34.66	99.2388		34.05	99.6315		109.83	93.9125
	34.64	99.2388		34.09	99.6315		109.92	93.9045
	34.66	99.2388		34.11	99.6315		110.01	93.9057
	34.7	99.2388		34.13	99.6315		110.1	93.8959
	34.71	99.2461		34.12	99.6315		110.18	93.8947
	34.71	99.2388		34.13	99.6315		110.28	93.8873
	34.72	99.2388		34.16	99.6315		110.37	93.8824
	34.76	99.2388		34.17	99.6315		110.47	93.8787
	34.77	99.2461		34.18	99.6315		110.55	93.8725
	34.76	99.2388		34.19	99.6315		110.65	93.8682
	34.78	99.2461		34.21	99.6315		110.74	93.8596
	34.81	99.2388		34.23	99.6315		110.85	93.8559
	34.83	99.2388		34.24	99.6315		110.92	93.8547
	34.83	99.2388		34.25	99.6284		111.02	93.8535
	34.84	99.2388		34.27	99.6284		111.12	93.8473
	34.87	99.2388		34.29	99.6284		111.21	93.8418
	34.87	99.2388		34.3	99.6284		111.3	93.8375
	34.89	99.2388		34.3	99.6284		111.39	93.8325
	34.9	99.2388		34.32	99.6284		111.48	93.8258
	34.91	99.2315		34.33	99.6284		111.58	93.8227
	34.94	99.2315		34.35	99.6284		111.67	93.8178
	34.95	99.2388		34.35	99.6284		111.78	93.8141
	34.96	99.2315		34.38	99.6284		111.85	93.811
	34.99	99.2315		34.4	99.6284		111.93	93.7981
	35	99.2388		34.39	99.6253		112.03	93.8042
	34.99	99.2388		34.42	99.6253		112.14	93.7919
	35.02	99.2388		34.44	99.6253		112.23	93.787
	35.05	99.2388		34.46	99.6253		112.31	93.7815
	35.05	99.2315		34.46	99.6222		112.41	93.7784
	35.06	99.2388		34.46	99.6253		112.52	93.7729
	35.09	99.2315		34.47	99.6222		112.6	93.7667
	35.1	99.2315		34.5	99.6222		112.69	93.7612
	35.11	99.2388		34.52	99.6222		112.78	93.7581
	35.13	99.2315		34.53	99.6222		112.88	93.7569
	35.15	99.2315		34.54	99.6192		112.97	93.7452
	35.17	99.2315		34.56	99.6222		113.06	93.7446
	35.16	99.2242		34.56	99.6222		113.16	93.7427
	35.19	99.2315		34.59	99.6222		113.24	93.7446
	35.19	99.2315		34.6	99.6222		113.33	93.7403
	35.21	99.2315		34.63	99.6192		113.42	93.7329
	35.22	99.2315		34.65	99.6192		113.53	93.7274
	35.24	99.2315		34.65	99.6192		113.61	93.7243
	35.25	99.2315		34.67	99.6192		113.69	93.7175
	35.27	99.2315		34.67	99.6161		113.79	93.7046
	35.29	99.2315		34.68	99.6161		113.88	93.7089
	35.3	99.2315		34.69	99.6161		113.98	93.7021
	35.32	99.2315		34.72	99.6161		114.06	93.6966
	35.33	99.2315		34.73	99.6161		114.15	93.6941
	35.35	99.2315		34.75	99.6161		114.24	93.6892
	35.36	99.2242		34.77	99.6161		114.34	93.6868
	35.37	99.2315		34.78	99.6161		114.43	93.68
	35.4	99.2315		34.8	99.6129		114.52	93.6763
	35.41	99.2315		34.81	99.6129		114.61	93.6738
	35.43	99.2315		34.81	99.6129		114.7	93.6695
	35.43	99.2315		34.82	99.6129		114.79	93.6659
	35.46	99.2388		34.84	99.6098		114.88	93.6585
	35.46	99.2315		34.86	99.6098		114.97	93.6572
	35.47	99.2315		34.88	99.6098		115.08	93.6511
	35.49	99.2315		34.9	99.6098		115.16	93.6468
	35.52	99.2315		34.9	99.6068		115.23	93.6462
	35.51	99.2315		34.91	99.6098		115.33	93.64
	35.53	99.2315		34.93	99.6037		115.42	93.6351
	35.56	99.2315		34.94	99.6037		115.5	93.6314
	35.57	99.2315		34.98	99.6005		115.59	93.6326
	35.59	99.2242		34.96	99.6037		115.69	93.6234
	35.6	99.2242		34.98	99.6005		115.77	93.6216
	35.62	99.2242		35	99.6037		115.85	93.6154
	35.63	99.2242		35.02	99.6005		115.95	93.6123
	35.62	99.2242		35.03	99.6005		116.03	93.605
	35.66	99.2242		35.03	99.6005		116.13	93.6031
	35.68	99.2242		35.06	99.5974		116.22	93.5982
	35.69	99.2169		35.08	99.5974		116.29	93.597
	35.71	99.2169		35.09	99.5974		116.4	93.5933
	35.72	99.2169		35.11	99.5944		116.49	93.5871
	35.74	99.2169		35.11	99.5944		116.57	93.5853
	35.75	99.2169		35.11	99.5913		116.67	93.5803
	35.76	99.2169		35.16	99.5913		116.77	93.5723
	35.77	99.2169		35.16	99.5944		116.85	93.5717
	35.79	99.2169		35.18	99.5913		116.94	93.5693
	35.8	99.2095		35.2	99.5881		117.03	93.5631
	35.82	99.2095		35.21	99.5881		117.1	93.5563
	35.82	99.2095		35.21	99.5881		117.19	93.5551
	35.86	99.2095		35.24	99.5881		117.28	93.5551
	35.88	99.2095		35.27	99.585		117.37	93.5453
	35.88	99.2095		35.26	99.585		117.46	93.5385
	35.9	99.2095		35.27	99.582		117.56	93.5397
	35.93	99.2095		35.29	99.582		117.63	93.5373
	35.93	99.2022		35.32	99.5789		117.72	93.5317
	35.94	99.2095		35.33	99.5789		117.81	93.5274
	35.96	99.2022		35.34	99.5789		117.9	93.5231
	35.98	99.2022		35.36	99.5789		117.99	93.5176
	35.99	99.2022		35.38	99.5789		118.07	93.5133
	36	99.2022		35.38	99.5789		118.16	93.5121
	36.02	99.2022		35.4	99.5789		118.24	93.5084
	36.04	99.2022		35.41	99.5757		118.34	93.5071
	36.06	99.2022		35.43	99.5757		118.42	93.5053
	36.06	99.2022		35.44	99.5726		118.51	93.4985
	36.08	99.2022		35.45	99.5757		118.61	93.493
	36.09	99.2022		35.46	99.5757		118.69	93.4874
	36.11	99.2022		35.5	99.5726		118.77	93.4887
	36.12	99.2022		35.5	99.5696		118.86	93.4874
	36.13	99.2022		35.51	99.5696		118.95	93.4819
	36.17	99.2022		35.53	99.5696		119.04	93.4788
	36.17	99.2022		35.56	99.5696		119.12	93.4758
	36.19	99.2022		35.56	99.5726		119.21	93.4684
	36.2	99.1949		35.56	99.5665		119.3	93.4647
	36.22	99.2022		35.59	99.5665		119.39	93.4653
	36.25	99.2022		35.61	99.5665		119.48	93.4585
	36.25	99.2022		35.62	99.5665		119.56	93.4579
	36.27	99.2022		35.62	99.5633		119.65	93.4555
	36.28	99.2022		35.64	99.5633		119.74	93.4499
	36.3	99.1949		35.68	99.5633		119.83	93.4438
	36.3	99.1949		35.69	99.5633		119.92	93.4413
	36.32	99.1949		35.68	99.5633		120	93.4395
	36.34	99.1949		35.69	99.5633		120.09	93.4346
	36.36	99.1949		35.74	99.5633		120.18	93.4352
	36.37	99.1949		35.74	99.5633		120.27	93.4278
	36.39	99.1949		35.75	99.5633		120.35	93.4278
	36.41	99.1949		35.76	99.5633		120.43	93.429
	36.43	99.1949		35.79	99.5633		120.51	93.4229
	36.43	99.1949		35.79	99.5633		120.59	93.4118
	36.46	99.1949		35.81	99.5633		120.69	93.4106
	36.48	99.1949		35.82	99.5633		120.78	93.4124
	36.48	99.1949		35.85	99.5633		120.86	93.4069
	36.49	99.1876		35.86	99.5633		120.96	93.4007
	36.52	99.1876		35.87	99.5633		121.04	93.4007
	36.54	99.1949		35.89	99.5602		121.14	93.3995
	36.54	99.1949		35.92	99.5602		121.21	93.394
	36.55	99.1876		35.92	99.5602		121.3	93.3927
	36.56	99.1949		35.93	99.5602		121.4	93.3884
	36.61	99.1876		35.94	99.5602		121.49	93.389
	36.61	99.1876		35.98	99.5602		121.57	93.3841
	36.62	99.1876		35.99	99.5571		121.66	93.3798
	36.65	99.1876		36	99.5571		121.74	93.3743
	36.66	99.1876		36.01	99.5571		121.82	93.3712
	36.68	99.1876		36.02	99.5571		121.91	93.3687
	36.67	99.1876		36.04	99.5571		122.01	93.3681
	36.7	99.1876		36.06	99.5571		122.08	93.3644
	36.72	99.1803		36.06	99.5571		122.16	93.3595
	36.73	99.1803		36.08	99.5571		122.25	93.3564
	36.74	99.1876		36.11	99.5571		122.34	93.3552
	36.75	99.1803		36.12	99.5541		122.45	93.3527
	36.79	99.1803		36.13	99.5541		122.53	93.3515
	36.79	99.1876		36.14	99.551		122.61	93.3478
	36.81	99.1803		36.14	99.551		122.7	93.3435
	36.82	99.1803		36.17	99.551		122.78	93.3417
	36.86	99.1803		36.19	99.551		122.87	93.338
	36.87	99.1803		36.21	99.551		122.95	93.3337
	36.88	99.1803		36.22	99.551		123.03	93.33
	36.88	99.1803		36.24	99.5478		123.11	93.3312
	36.93	99.1803		36.25	99.5478		123.21	93.3306
	36.92	99.173		36.27	99.5478		123.29	93.3226
	36.92	99.1803		36.29	99.5478		123.38	93.3214
	36.94	99.173		36.3	99.5478		123.47	93.3183
	36.99	99.1656		36.33	99.5447		123.54	93.314
	36.99	99.1656		36.35	99.5478		123.64	93.3091
	36.98	99.173		36.35	99.5447		123.72	93.3103
	37	99.173		36.36	99.5447		123.8	93.3048
	37.04	99.1656		36.37	99.5447		123.89	93.3054
	37.06	99.173		36.39	99.5447		123.98	93.2968
	37.08	99.173		36.4	99.5417		124.06	93.2968
	37.09	99.173		36.42	99.5417		124.15	93.2943
	37.12	99.1656		36.44	99.5417		124.23	93.2912
	37.12	99.1656		36.46	99.5447		124.31	93.2906
	37.12	99.1656		36.47	99.5417		124.41	93.2875
	37.14	99.1656		36.48	99.5417		124.5	93.2863
	37.16	99.1656		36.49	99.5417		124.57	93.2826
	37.19	99.173		36.54	99.5417		124.66	93.2814
	37.19	99.1656		36.54	99.5386		124.75	93.2789
	37.2	99.1656		36.54	99.5386		124.84	93.2746
	37.23	99.1656		36.57	99.5386		124.92	93.2709
	37.23	99.1656		36.59	99.5386		124.99	93.2709
	37.26	99.1656		36.6	99.5386		125.1	93.2678
	37.26	99.1656		36.61	99.5355		125.18	93.266
	37.29	99.1656		36.64	99.5355		125.25	93.2605
	37.3	99.1656		36.65	99.5324		125.35	93.2605
	37.32	99.1656		36.66	99.5293		125.44	93.2562
	37.34	99.1656		36.67	99.5293		125.51	93.2525
	37.35	99.1656		36.68	99.5262		125.6	93.2525
	37.37	99.1656		36.7	99.5262		125.68	93.2494
	37.38	99.1656		36.72	99.5262		125.77	93.2463
	37.39	99.1583		36.74	99.5231		125.85	93.2445
	37.42	99.1583		36.75	99.5231		125.94	93.2414
	37.43	99.1656		36.77	99.52		126.03	93.2402
	37.46	99.1656		36.77	99.52		126.11	93.2377
	37.44	99.1656		36.79	99.52		126.21	93.2352
	37.5	99.1656		36.81	99.5169		126.28	93.2303
	37.51	99.1583		36.83	99.5231		126.35	93.2279
	37.52	99.1656		36.85	99.5231		126.45	93.2242
	37.54	99.1583		36.87	99.5231		126.53	93.2248
	37.53	99.1583		36.87	99.5169		126.62	93.2236
	37.56	99.1583		36.89	99.52		126.71	93.2211
	37.56	99.1583		36.9	99.52		126.79	93.2211
	37.59	99.1583		36.92	99.5169		126.88	93.2174
	37.61	99.1583		36.93	99.5169		126.97	93.2149
	37.63	99.1583		36.97	99.5138		127.06	93.2113
	37.64	99.1583		36.97	99.5107		127.13	93.207
	37.67	99.1583		36.98	99.5107		127.21	93.207
	37.68	99.1583		36.99	99.5107		127.31	93.207
	37.7	99.151		37.02	99.5076		127.4	93.2057
	37.71	99.1583		37.05	99.5076		127.46	93.202
	37.73	99.151		37.05	99.5107		127.56	93.1996
	37.75	99.151		37.06	99.5076		127.64	93.1953
	37.75	99.1583		37.08	99.5045		127.73	93.1953
	37.76	99.151		37.1	99.5045		127.81	93.1922
	37.78	99.151		37.13	99.5045		127.9	93.1885
	37.81	99.151		37.13	99.4983		127.98	93.1879
	37.82	99.151		37.15	99.4983		128.06	93.1873
	37.84	99.151		37.18	99.5014		128.15	93.1836
	37.84	99.1437		37.19	99.5014		128.24	93.1811
	37.86	99.1437		37.19	99.4983		128.31	93.1805
	37.89	99.151		37.2	99.4952		128.41	93.178
	37.9	99.151		37.23	99.4983		128.5	93.1774
	37.92	99.151		37.24	99.4983		128.58	93.1737
	37.93	99.1437		37.25	99.4952		128.67	93.1694
	37.94	99.1437		37.27	99.4921		128.76	93.1682
	37.96	99.1437		37.29	99.4921		128.83	93.1645
	37.97	99.1437		37.31	99.4921		128.92	93.1627
	37.99	99.1437		37.31	99.4921		129.01	93.1608
	38.01	99.1437		37.33	99.4921		129.1	93.1571
	38.03	99.1437		37.36	99.489		129.18	93.1565
	38.05	99.1437		37.38	99.489		129.27	93.1534
	38.07	99.1363		37.39	99.489		129.35	93.1547
	38.09	99.1363		37.39	99.4921		129.43	93.1553
	38.1	99.1363		37.43	99.489		129.51	93.1528
	38.1	99.1363		37.44	99.489		129.6	93.1522
	38.13	99.1363		37.43	99.4921		129.69	93.1504
	38.15	99.1363		37.45	99.489		129.78	93.1491
	38.17	99.1363		37.48	99.489		129.87	93.1454
	38.15	99.1363		37.5	99.489		129.93	93.1448
	38.2	99.1363		37.52	99.4859		130.02	93.1442
	38.22	99.1363		37.52	99.4859		130.12	93.1424
	38.23	99.1363		37.56	99.489		130.19	93.1417
	38.24	99.129		37.56	99.4859		130.28	93.1393
	38.27	99.129		37.57	99.4859		130.37	93.1381
	38.3	99.129		37.59	99.4797		130.44	93.135
	38.31	99.129		37.61	99.4828		130.54	93.1331
	38.3	99.129		37.63	99.4828		130.6	93.1319
	38.33	99.129		37.62	99.4828		130.7	93.1294
	38.36	99.1217		37.64	99.4797		130.78	93.13
	38.36	99.1217		37.68	99.4766		130.86	93.1276
	38.38	99.1217		37.69	99.4797		130.95	93.127
	38.39	99.1217		37.71	99.4766		131.03	93.1245
	38.41	99.1217		37.72	99.4735		131.12	93.1227
	38.44	99.1217		37.74	99.4766		131.21	93.1184
	38.43	99.1217		37.75	99.4735		131.29	93.1147
	38.46	99.1217		37.77	99.4735		131.38	93.1147
	38.49	99.1217		37.78	99.4735		131.46	93.1128
	38.5	99.1217		37.81	99.4735		131.55	93.1134
	38.5	99.1144		37.82	99.4735		131.62	93.1122
	38.54	99.1217		37.85	99.4735		131.72	93.1085
	38.55	99.1217		37.86	99.4704		131.79	93.1104
	38.56	99.1144		37.88	99.4735		131.89	93.1055
	38.57	99.1217		37.88	99.4704		131.96	93.1042
	38.57	99.1217		37.9	99.4735		132.05	93.1018
	38.61	99.1144		37.91	99.4704		132.14	93.0999
	38.62	99.1144		37.94	99.4704		132.22	93.0993
	38.64	99.1144		37.95	99.4704		132.31	93.0974
	38.66	99.1144		37.96	99.4704		132.39	93.0974
	38.67	99.1144		37.97	99.4673		132.47	93.0944
	38.69	99.1144		37.98	99.4673		132.55	93.0925
	38.71	99.1217		38.01	99.4642		132.65	93.0931
	38.72	99.1217		38.04	99.4642		132.73	93.0913
	38.75	99.1144		38.04	99.4611		132.82	93.0876
	38.77	99.1144		38.07	99.458		132.89	93.0851
	38.77	99.1144		38.08	99.4549		132.98	93.0858
	38.79	99.1071		38.1	99.4518		133.06	93.0851
	38.8	99.1071		38.11	99.4518		133.14	93.0833
	38.83	99.1071		38.12	99.4518		133.23	93.0821
	38.83	99.1071		38.14	99.4487		133.31	93.0821
	38.84	99.1071		38.16	99.4456		133.39	93.079
	38.87	99.1071		38.19	99.4425		133.48	93.0772
	38.9	99.1071		38.2	99.4456		133.57	93.0747
	38.9	99.1071		38.2	99.4456		133.65	93.0747
	38.93	99.1071		38.23	99.4456		133.73	93.0722
	38.94	99.1071		38.24	99.4425		133.82	93.0722
	38.96	99.1071		38.26	99.4456		133.9	93.0716
	38.98	99.0998		38.3	99.4456		133.98	93.0704
	38.99	99.0998		38.28	99.4394		134.07	93.0685
	39.02	99.0998		38.3	99.4363		134.16	93.0673
	39.03	99.0998		38.32	99.4363		134.24	93.0661
	39.04	99.0998		38.35	99.4394		134.32	93.0655
	39.05	99.0924		38.36	99.4363		134.4	93.0778
	39.08	99.0998		38.38	99.4363		134.47	93.0784
	39.09	99.0924		38.39	99.4363		134.57	93.0796
	39.1	99.0924		38.4	99.4363		134.66	93.0821
	39.13	99.0924		38.42	99.4332		134.74	93.0851
	39.14	99.0924		38.45	99.4301		134.84	93.0919
	39.17	99.0924		38.46	99.4301		134.92	93.1067
	39.19	99.0924		38.47	99.4301		134.99	93.1214
	39.19	99.0851		38.49	99.4239		135.08	93.1614
	39.2	99.0851		38.51	99.427		135.17	93.0612
	39.23	99.0851		38.52	99.4239		135.24	93.0458
	39.25	99.0851		38.54	99.4208		135.33	93.0249
	39.25	99.0851		38.55	99.4239		135.42	92.9664
	39.27	99.0851		38.57	99.4177		135.5	92.9861
	39.3	99.0778		38.59	99.4208		135.58	92.9843
	39.31	99.0851		38.6	99.4239		135.67	93.0132
	39.32	99.0778		38.62	99.4239		135.76	93.0206
	39.33	99.0778		38.64	99.4208		135.84	93.023
	39.36	99.0778		38.64	99.4208		135.91	93.0267
	39.37	99.0778		38.67	99.4177		136	93.0378
	39.38	99.0778		38.68	99.4177		136.08	93.0366
	39.41	99.0778		38.71	99.4177		136.17	93.0359
	39.44	99.0705		38.74	99.4146		136.25	93.0347
	39.45	99.0705		38.74	99.4146		136.33	93.0335
	39.47	99.0705		38.77	99.4115		136.41	93.0323
	39.47	99.0705		38.76	99.4115		136.5	93.0304
	39.5	99.0705		38.79	99.4084		136.59	93.0298
	39.51	99.0705		38.8	99.4084		136.67	93.0292
	39.53	99.0705		38.83	99.4115		136.75	93.0279
	39.55	99.0632		38.84	99.4084		136.84	93.0267
	39.57	99.0632		38.86	99.4053		136.92	93.0255
	39.59	99.0632		38.87	99.3991		137	93.0224
	39.6	99.0632		38.89	99.4022		137.1	93.0199
	39.61	99.0632		38.89	99.396		137.17	93.0181
	39.63	99.0632		38.91	99.396		137.27	93.0132
	39.65	99.0632		38.94	99.396		137.36	93.0101
	39.68	99.0632		38.95	99.396		137.44	93.0113
	39.69	99.0632		38.96	99.3929		137.51	93.0095
	39.71	99.0558		38.99	99.3898		137.6	93.0095
	39.72	99.0558		39.02	99.396		137.68	93.0083
	39.73	99.0558		39.03	99.396		137.77	93.0058
	39.75	99.0558		39.03	99.3898		137.86	93.0046
	39.77	99.0558		39.04	99.3898		137.93	93.004
	39.78	99.0558		39.08	99.3929		138.02	93.0027
	39.81	99.0485		39.1	99.3898		138.11	93.0015
	39.82	99.0558		39.09	99.3898		138.18	92.999
	39.83	99.0485		39.11	99.3836		138.27	92.999
	39.85	99.0485		39.14	99.3836		138.35	92.9978
	39.87	99.0485		39.16	99.3867		138.44	92.9959
	39.89	99.0485		39.15	99.3836		138.51	92.9959
	39.91	99.0485		39.19	99.3867		138.61	92.9959
	39.92	99.0412		39.22	99.3836		138.7	92.9941
	39.96	99.0412		39.22	99.3836		138.78	92.9941
	39.97	99.0339		39.23	99.3836		138.85	92.9941
	39.99	99.0339		39.24	99.3805		138.94	92.9929
	40	99.0412		39.27	99.3774		139.04	92.9929
	40.02	99.0339		39.3	99.3774		139.11	92.9917
	40.02	99.0339		39.3	99.3743		139.21	92.991
	40.03	99.0266		39.32	99.3774		139.27	92.9904
	40.06	99.0266		39.34	99.3805		139.37	92.9898
	40.08	99.0266		39.35	99.3774		139.44	92.9892
	40.09	99.0266		39.37	99.3743		139.54	92.9886
	40.12	99.0266		39.39	99.365		139.61	92.9867
	40.14	99.0266		39.42	99.3681		139.69	92.9855
	40.15	99.0266		39.44	99.3681		139.78	92.9843
	40.16	99.0266		39.44	99.3743		139.87	92.9824
	40.19	99.0266		39.44	99.3712		139.95	92.9824
	40.2	99.0266		39.5	99.3681		140.04	92.9812
	40.22	99.0192		39.49	99.3681		140.13	92.9806
	40.22	99.0192		39.5	99.365		140.2	92.98
	40.25	99.0192		39.52	99.3712		140.29	92.9793
	40.28	99.0192		39.56	99.365		140.37	92.98
	40.3	99.0119		39.56	99.365		140.44	92.9793
	40.31	99.0119		39.57	99.3619		140.54	92.9787
	40.32	99.0119		39.6	99.3588		140.62	92.9781
	40.34	99.0119		39.62	99.3557		140.71	92.9775
	40.36	99.0119		39.64	99.3588		140.79	92.9763
	40.35	99.0119		39.65	99.3557		140.86	92.975
	40.39	99.0119		39.66	99.3526		140.96	92.9738
	40.41	99.0119		39.68	99.3526		141.04	92.972
	40.45	99.0046		39.7	99.3464		141.13	92.9707
	40.43	99.0046		39.71	99.3464		141.21	92.9695
	40.45	99.0046		39.72	99.3464		141.29	92.9689
	40.48	99.0119		39.74	99.3433		141.38	92.967
	40.5	99.0119		39.76	99.3464		141.46	92.967
	40.51	99.0119		39.78	99.3464		141.54	92.9664
	40.52	99.0046		39.79	99.3402		141.63	92.9652
	40.57	99.0046		39.83	99.3402		141.72	92.9646
	40.58	99.0046		39.83	99.3371		141.8	92.964
	40.57	99.0046		39.86	99.3371		141.87	92.964
	40.61	99.0046		39.87	99.334		141.96	92.9627
	40.63	99.0046		39.87	99.334		142.04	92.9621
	40.65	99.0046		39.9	99.3309		142.14	92.9597
	40.64	99.0046		39.92	99.334		142.21	92.9603
	40.67	99.0046		39.95	99.334		142.3	92.9584
	40.69	98.9973		39.94	99.3278		142.38	92.9584
	40.71	98.99		39.98	99.3278		142.46	92.9572
	40.72	98.99		39.97	99.3309		142.55	92.956
	40.73	98.99		40	99.3278		142.63	92.9547
	40.75	98.99		40.03	99.3278		142.71	92.9541
	40.78	98.99		40.05	99.3278		142.8	92.9541
	40.79	98.9973		40.06	99.3247		142.88	92.9523
	40.8	98.99		40.08	99.3278		142.96	92.9517
	40.83	98.9973		40.09	99.3216		143.05	92.9498
	40.85	98.99		40.11	99.3216		143.13	92.9504
	40.85	98.99		40.13	99.3185		143.22	92.9486
	40.88	98.99		40.14	99.3216		143.3	92.9486
	40.89	98.99		40.16	99.3185		143.39	92.9467
	40.92	98.99		40.16	99.3185		143.47	92.9455
	40.93	98.99		40.18	99.3216		143.55	92.9455
	40.95	98.9827		40.21	99.3216		143.64	92.9449
	40.97	98.9827		40.22	99.3154		143.72	92.9449
	41	98.9827		40.23	99.3092		143.8	92.9437
	41.01	98.9827		40.23	99.3185		143.88	92.9437
	41.02	98.9827		40.26	99.3123		143.97	92.9418
	41.04	98.9827		40.31	99.303		144.04	92.9418
	41.05	98.9827		40.33	99.3061		144.13	92.9418
	41.08	98.9827		40.32	99.303		144.21	92.9412
	41.08	98.9827		40.35	99.303		144.3	92.94
	41.1	98.9753		40.37	99.2999		144.38	92.9387
	41.12	98.9827		40.38	99.2999		144.47	92.9381
	41.13	98.9753		40.41	99.2968		144.55	92.9381
	41.16	98.9753		40.42	99.2999		144.64	92.9369
	41.18	98.9827		40.43	99.2906		144.73	92.9363
	41.2	98.9827		40.45	99.2937		144.81	92.9351
	41.22	98.9753		40.47	99.2875		144.89	92.9332
	41.22	98.9753		40.48	99.2875		144.98	92.9332
	41.24	98.9753		40.49	99.2875		145.05	92.9326
	41.27	98.9753		40.53	99.2813		145.15	92.9314
	41.3	98.9753		40.54	99.2844		145.22	92.9301
	41.31	98.9753		40.55	99.2844		145.31	92.9295
	41.33	98.9753		40.56	99.2751		145.4	92.9277
	41.33	98.968		40.58	99.2751		145.47	92.9271
	41.34	98.9753		40.61	99.2813		145.55	92.9264
	41.36	98.968		40.63	99.272		145.64	92.9264
	41.38	98.968		40.64	99.272		145.72	92.9258
	41.41	98.9753		40.66	99.2658		145.81	92.9246
	41.43	98.968		40.68	99.2689		145.9	92.9246
	41.44	98.968		40.7	99.2627		145.98	92.924
	41.46	98.968		40.71	99.2565		146.06	92.9234
	41.48	98.968		40.72	99.2658		146.14	92.9227
	41.48	98.968		40.74	99.2627		146.23	92.9221
	41.51	98.968		40.77	99.2565		146.32	92.9221
	41.54	98.9607		40.77	99.2596		146.39	92.9215
	41.54	98.9607		40.77	99.2565		146.48	92.9209
	41.56	98.9607		40.8	99.2503		146.57	92.9215
	41.57	98.968		40.83	99.2534		146.65	92.9203
	41.59	98.9607		40.85	99.2503		146.73	92.9197
	41.62	98.9607		40.87	99.2503		146.81	92.9197
	41.63	98.9607		40.88	99.2534		146.9	92.9191
	41.64	98.9607		40.9	99.2441		146.98	92.9184
	41.66	98.9607		40.93	99.2472		147.06	92.9191
	41.69	98.9607		40.96	99.2472		147.16	92.9178
	41.73	98.9607		40.96	99.2503		147.23	92.9172
	41.72	98.9607		40.98	99.2472		147.32	92.9172
	41.74	98.9607		40.99	99.2534		147.4	92.916
	41.76	98.9607		41.01	99.2472		147.49	92.916
	41.79	98.9607		41.02	99.2472		147.57	92.9154
	41.79	98.9534		41.03	99.2503		147.67	92.9141
	41.81	98.9607		41.05	99.2441		147.74	92.9135
	41.84	98.9607		41.08	99.241		147.82	92.9135
	41.86	98.9534		41.1	99.2348		147.91	92.9129
	41.88	98.9534		41.12	99.241		147.99	92.9117
	41.89	98.9534		41.13	99.241		148.07	92.9117
	41.89	98.9461		41.15	99.2379		148.16	92.9111
	41.91	98.9461		41.15	99.2348		148.23	92.9111
	41.94	98.9461		41.18	99.2317		148.32	92.9104
	41.95	98.9461		41.2	99.2379		148.42	92.9098
	41.96	98.9461		41.22	99.2379		148.49	92.9092
	41.98	98.9461		41.23	99.2317		148.57	92.9086
	42.01	98.9461		41.26	99.2379		148.67	92.908
	42.02	98.9461		41.27	99.2348		148.73	92.9074
	42.05	98.9461		41.3	99.2255		148.83	92.9068
	42.05	98.9387		41.3	99.2286		148.92	92.9061
	42.08	98.9387		41.32	99.2317		149	92.9055
	42.09	98.9387		41.33	99.2317		149.08	92.9055
	42.11	98.9387		41.35	99.2286		149.16	92.9049
	42.14	98.9387		41.38	99.2286		149.24	92.9043
	42.15	98.9314		41.39	99.2255		149.33	92.9043
	42.17	98.9314		41.43	99.2286		149.42	92.9043
	42.19	98.9314		41.42	99.2224		149.5	92.9049
	42.2	98.9314		41.44	99.2224		149.57	92.9043
	42.22	98.9314		41.47	99.2131		149.66	92.9037
	42.25	98.9314		41.49	99.2131		149.73	92.9037
	42.27	98.9314		41.51	99.2162		149.83	92.9031
	42.28	98.9314		41.51	99.21		149.92	92.9025
	42.3	98.9314		41.54	99.2069		150	92.9025
	42.31	98.9314		41.55	99.2038		150.07	92.9025
	42.33	98.9314		41.56	99.2038		150.16	92.9018
	42.35	98.9314		41.6	99.21		150.23	92.9012
	42.36	98.9314		41.6	99.2069		150.34	92.9012
	42.38	98.9314		41.62	99.2007		150.41	92.9012
	42.39	98.9314		41.65	99.1976		150.5	92.9006
	42.43	98.9241		41.66	99.2007		150.59	92.9006
	42.44	98.9241		41.68	99.2007		150.67	92.9006
	42.44	98.9241		41.7	99.1976		150.76	92.9
	42.47	98.9241		41.73	99.2007		150.83	92.8988
	42.5	98.9241		41.73	99.2038		150.92	92.8975
	42.51	98.9241		41.74	99.1976		151	92.8969
	42.53	98.9168		41.77	99.1976		151.09	92.8963
	42.54	98.9241		41.78	99.1945		151.16	92.8963
	42.58	98.9168		41.78	99.1914		151.26	92.8963
	42.59	98.9168		41.81	99.1945		151.34	92.8957
	42.59	98.9168		41.83	99.1914		151.41	92.8957
	42.62	98.9095		41.84	99.1945		151.51	92.8951
	42.65	98.9095		41.87	99.1883		151.6	92.8957
	42.65	98.9095		41.89	99.1852		151.68	92.8951
	42.67	98.9095		41.9	99.1852		151.74	92.8945
	42.67	98.9095		41.91	99.1852		151.85	92.8938
	42.73	98.9095		41.94	99.1914		151.93	92.8938
	42.74	98.9021		41.93	99.1821		152.01	92.8932
	42.74	98.9021		41.97	99.1852		152.1	92.8926
	42.76	98.9021		41.98	99.1821		152.18	92.8926
	42.79	98.9021		42.01	99.179		152.26	92.892
	42.8	98.9021		42.02	99.1883		152.34	92.892
	42.81	98.9021		42.05	99.1852		152.42	92.8914
	42.82	98.8948		42.06	99.1759		152.52	92.8914
	42.84	98.8948		42.08	99.179		152.6	92.8902
	42.87	98.8948		42.09	99.1821		152.68	92.8902
	42.88	98.8948		42.12	99.179		152.76	92.8895
	42.89	98.8948		42.14	99.1759		152.84	92.8895
	42.92	98.8948		42.14	99.179		152.92	92.8889
	42.93	98.8948		42.17	99.1728		153	92.8883
	42.97	98.8948		42.19	99.1697		153.11	92.8877
	42.98	98.8948		42.21	99.1666		153.18	92.8871
	42.99	98.8875		42.24	99.1666		153.27	92.8871
	43	98.8875		42.24	99.1635		153.36	92.8865
	43.04	98.8875		42.25	99.1635		153.43	92.8865
	43.04	98.8875		42.27	99.1573		153.51	92.8865
	43.06	98.8802		42.3	99.148		153.59	92.8858
	43.09	98.8802		42.32	99.1511		153.68	92.8852
	43.11	98.8802		42.34	99.1511		153.76	92.8846
	43.12	98.8802		42.36	99.1418		153.85	92.8858
	43.15	98.8802		42.37	99.148		153.93	92.8858
	43.15	98.8802		42.39	99.148		154.02	92.8852
	43.18	98.8729		42.41	99.148		154.09	92.8852
	43.2	98.8729		42.43	99.148		154.19	92.8852
	43.2	98.8729		42.46	99.1449		154.26	92.8852
	43.23	98.8729		42.46	99.1449		154.34	92.8852
	43.25	98.8655		42.47	99.148		154.43	92.8852
	43.26	98.8729		42.5	99.1449		154.5	92.8852
	43.28	98.8655		42.52	99.1356		154.59	92.8846
	43.3	98.8655		42.53	99.1356		154.67	92.8846
	43.33	98.8655		42.54	99.1294		154.76	92.8852
	43.34	98.8582		42.58	99.1263		154.84	92.8846
	43.36	98.8582		42.58	99.1263		154.93	92.8846
	43.38	98.8655		42.6	99.1263		155.03	92.8846
	43.39	98.8582		42.62	99.1232		155.1	92.884
	43.42	98.8582		42.64	99.1232		155.18	92.884
	43.43	98.8582		42.65	99.1263		155.27	92.8834
	43.46	98.8582		42.66	99.1232		155.36	92.884
	43.47	98.8582		42.68	99.1232		155.44	92.884
	43.47	98.8509		42.71	99.1232		155.52	92.8834
	43.52	98.8509		42.73	99.1108		155.61	92.8821
	43.53	98.8582		42.73	99.1139		155.67	92.8821
	43.55	98.8509		42.76	99.1077		155.77	92.8815
	43.56	98.8509		42.77	99.1015		155.85	92.8809
	43.58	98.8509		42.8	99.0922		155.93	92.8803
	43.6	98.8509		42.8	99.0953		156.01	92.8803
	43.62	98.8509		42.83	99.0953		156.09	92.8797
	43.63	98.8509		42.86	99.0922		156.19	92.8797
	43.64	98.8509		42.88	99.086		156.27	92.8785
	43.67	98.8509		42.88	99.0891		156.36	92.8778
	43.7	98.8509		42.9	99.0829		156.44	92.8766
	43.7	98.8509		42.94	99.0767		156.52	92.876
	43.72	98.8509		42.94	99.0891		156.6	92.876
	43.76	98.8436		42.97	99.086		156.69	92.8754
	43.78	98.8436		42.98	99.0798		156.78	92.8754
	43.77	98.8436		43.01	99.0829		156.87	92.8748
	43.8	98.8363		43.01	99.0798		156.95	92.8742
	43.83	98.8436		43.02	99.0736		157.02	92.8742
	43.85	98.8436		43.03	99.0705		157.12	92.8729
	43.85	98.8363		43.09	99.0705		157.19	92.8723
	43.87	98.8363		43.11	99.0674		157.27	92.8711
	43.9	98.829		43.1	99.0643		157.36	92.8705
	43.91	98.829		43.12	99.0612		157.44	92.8711
	43.92	98.829		43.14	99.0643		157.53	92.8711
	43.94	98.829		43.16	99.0612		157.6	92.8705
	43.96	98.8216		43.17	99.0643		157.69	92.8692
	43.98	98.829		43.2	99.0643		157.77	92.8686
	44	98.829		43.24	99.0581		157.87	92.8674
	44.01	98.829		43.23	99.0643		157.95	92.8662
	44.05	98.8216		43.25	99.0643		158.04	92.8662
	44.06	98.8216		43.25	99.0612		158.12	92.8662
	44.07	98.8216		43.29	99.0612		158.19	92.8662
	44.1	98.8216		43.3	99.0612		158.29	92.8649
	44.11	98.8216		43.32	99.0581		158.36	92.8643
	44.14	98.8216		43.33	99.0612		158.45	92.8625
	44.14	98.8216		43.35	99.0612		158.53	92.8606
	44.16	98.8216		43.36	99.055		158.61	92.8606
	44.18	98.8216		43.39	99.0488		158.71	92.8606
	44.19	98.8216		43.41	99.0488		158.79	92.86
	44.23	98.8216		43.41	99.055		158.87	92.8582
	44.23	98.8216		43.43	99.055		158.95	92.8582
	44.26	98.8216		43.46	99.0519		159.03	92.8569
	44.27	98.8216		43.48	99.0488		159.12	92.8569
	44.28	98.8216		43.49	99.0488		159.2	92.8563
	44.31	98.8216		43.52	99.0519		159.28	92.8557
	44.33	98.8143		43.54	99.0488		159.37	92.8557
	44.35	98.8216		43.55	99.0457		159.45	92.8551
	44.38	98.8216		43.59	99.0519		159.54	92.8551
	44.4	98.8143		43.6	99.0395		159.62	92.8545
	44.41	98.8143		43.61	99.0395		159.7	92.8545
	44.42	98.8143		43.62	99.0426		159.79	92.8545
	44.44	98.8143		43.66	99.0395		159.86	92.8538
	44.46	98.807		43.67	99.0426		159.96	92.8532
	44.48	98.807		43.68	99.0426		160.03	92.8532
	44.51	98.807		43.71	99.0333		160.12	92.8532
	44.51	98.807		43.72	99.0271		160.21	92.8526
	44.53	98.807		43.73	99.024		160.28	92.852
	44.55	98.807		43.75	99.0209		160.37	92.8514
	44.56	98.7997		43.78	99.0178		160.44	92.8514
	44.59	98.7997		43.78	99.0178		160.53	92.8508
	44.62	98.807		43.8	99.0147		160.61	92.8495
	44.61	98.7997		43.81	99.0178		160.69	92.8502
	44.66	98.7997		43.84	99.0209		160.78	92.8483
	44.68	98.7997		43.86	99.024		160.87	92.8483
	44.68	98.7997		43.88	99.0116		160.94	92.8477
	44.69	98.7997		43.9	99.0085		161.02	92.8471
	44.73	98.7997		43.91	99.0147		161.1	92.8459
	44.74	98.7924		43.94	99.0147		161.19	92.8452
	44.76	98.7997		43.94	99.0085		161.28	92.8446
	44.77	98.7997		43.98	99.0085		161.36	92.8446
	44.79	98.7924		43.99	99.0054		161.45	92.8446
	44.8	98.7997		44.01	99.0085		161.53	92.8434
	44.82	98.7924		44.04	98.9992		161.6	92.8434
	44.84	98.7924		44.04	98.9992		161.69	92.8428
	44.87	98.7924		44.05	99.0023		161.77	92.8428
	44.89	98.7924		44.08	98.9992		161.85	92.8415
	44.92	98.7924		44.11	98.9992		161.94	92.8409
	44.91	98.7924		44.11	98.9961		162.02	92.8409
	44.96	98.7924		44.14	98.9899		162.11	92.8403
	44.97	98.7924		44.16	98.9992		162.19	92.8403
	44.98	98.7924		44.19	98.993		162.29	92.8403
	44.99	98.7924		44.2	98.993		162.35	92.8403
	45.02	98.7924		44.2	98.9961		162.44	92.8397
	45.05	98.785		44.24	98.9961		162.53	92.8397
	45.05	98.785		44.26	98.9899		162.61	92.8391
	45.07	98.785		44.3	98.9806		162.69	92.8385
	45.09	98.785		44.28	98.9837		162.78	92.8379
	45.12	98.785		44.29	98.9868		162.86	92.8379
	45.12	98.785		44.33	98.9868		162.96	92.8379
	45.14	98.785		44.35	98.9806		163.03	92.8372
	45.16	98.785		44.36	98.9775		163.11	92.8366
	45.19	98.785		44.38	98.9775		163.2	92.8366
	45.2	98.785		44.4	98.9744		163.27	92.8366
	45.21	98.785		44.42	98.9713		163.36	92.8366
	45.24	98.785		44.42	98.9713		163.45	92.8354
	45.27	98.785		44.44	98.9713		163.52	92.8348
	45.28	98.785		44.47	98.9682		163.61	92.8342
	45.29	98.785		44.48	98.9651		163.69	92.8336
	45.32	98.7777		44.5	98.9651		163.78	92.8336
	45.34	98.785		44.52	98.962		163.86	92.8323
	45.34	98.7777		44.55	98.9682		163.95	92.8323
	45.37	98.7777		44.57	98.9527		164.01	92.8323
	45.4	98.7777		44.57	98.9496		164.11	92.8317
	45.42	98.7777		44.59	98.9496		164.19	92.8311
	45.42	98.7777		44.62	98.9465		164.27	92.8311
	45.46	98.7777		44.65	98.9403		164.36	92.8305
	45.46	98.7777		44.66	98.9341		164.44	92.8299
	45.5	98.7777		44.66	98.9372		164.52	92.8293
	45.51	98.7777		44.69	98.9372		164.61	92.8286
	45.51	98.7777		44.7	98.931		164.69	92.8286
	45.53	98.7777		44.72	98.9341		164.78	92.828
	45.56	98.7704		44.75	98.931		164.86	92.8274
	45.57	98.7704		44.78	98.9279		164.94	92.8274
	45.6	98.7704		44.79	98.9217		165.02	92.8274
	45.6	98.7704		44.8	98.9248		165.09	92.8268
	45.62	98.7704		44.82	98.9155		165.2	92.8268
	45.64	98.7704		44.84	98.9124		165.27	92.8262
	45.66	98.7704		44.85	98.9124		165.35	92.8256
	45.68	98.7704		44.87	98.9062		165.45	92.8256
	45.71	98.7631		44.89	98.9031		165.52	92.8249
	45.71	98.7704		44.91	98.9186		165.61	92.8249
	45.74	98.7704		44.93	98.9124		165.68	92.8243
	45.77	98.7704		44.97	98.9062		165.78	92.8237
	45.79	98.7704		44.97	98.9093		165.86	92.8231
	45.8	98.7631		44.98	98.9186		165.94	92.8231
	45.82	98.7631		45.01	98.9155		166.03	92.8231
	45.83	98.7631		45.02	98.9093		166.11	92.8225
	45.87	98.7631		45.05	98.9031		166.19	92.8225
	45.88	98.7631		45.06	98.9031		166.27	92.8225
	45.88	98.7631		45.08	98.9062		166.36	92.8219
	45.9	98.7558		45.1	98.9031		166.45	92.8213
	45.93	98.7631		45.12	98.9		166.53	92.8206
	45.95	98.7558		45.13	98.9		166.61	92.8206
	45.97	98.7631		45.15	98.8969		166.7	92.82
	45.98	98.7558		45.16	98.9		166.79	92.8194
	46	98.7484		45.18	98.8969		166.85	92.8188
	46.03	98.7558		45.21	98.8938		166.94	92.8182
	46.04	98.7558		45.23	98.8969		167.01	92.8182
	46.06	98.7484		45.25	98.8969		167.1	92.8182
	46.09	98.7484		45.26	98.8814		167.19	92.8176
	46.1	98.7484		45.27	98.8814		167.28	92.8176
	46.12	98.7558		45.29	98.8814		167.35	92.8169
	46.13	98.7484		45.32	98.8783		167.44	92.8151
	46.16	98.7484		45.33	98.869		167.52	92.8145
	46.18	98.7411		45.36	98.8597		167.6	92.8145
	46.18	98.7411		45.37	98.8628		167.69	92.8139
	46.21	98.7411		45.39	98.8659		167.78	92.8139
	46.24	98.7484		45.4	98.8566		167.87	92.8132
	46.25	98.7411		45.42	98.8473		167.94	92.8132
	46.27	98.7484		45.45	98.8473		168.03	92.8126
	46.28	98.7484		45.46	98.8535		168.13	92.8126
	46.3	98.7484		45.47	98.8535		168.21	92.812
	46.31	98.7484		45.5	98.8442		168.29	92.812
	46.34	98.7411		45.53	98.8442		168.38	92.812
	46.36	98.7411		45.55	98.8411		168.46	92.812
	46.39	98.7411		45.55	98.8411		168.54	92.8114
	46.4	98.7411		45.57	98.8442		168.62	92.8114
	46.4	98.7411		45.6	98.838		168.7	92.8108
	46.43	98.7411		45.62	98.8349		168.8	92.8108
	46.45	98.7411		45.63	98.838		168.87	92.8102
	46.48	98.7338		45.65	98.838		168.95	92.8102
	46.5	98.7338		45.67	98.8349		169.05	92.8102
	46.52	98.7338		45.68	98.8349		169.13	92.8102
	46.53	98.7265		45.7	98.8349		169.21	92.8096
	46.55	98.7265		45.73	98.838		169.3	92.8096
	46.56	98.7265		45.76	98.8349		169.37	92.8089
	46.58	98.7265		45.76	98.838		169.46	92.8089
	46.6	98.7265		45.78	98.838		169.55	92.8083
	46.63	98.7265		45.81	98.8349		169.63	92.8083
	46.65	98.7265		45.83	98.8349		169.72	92.8077
	46.67	98.7265		45.84	98.8287		169.8	92.8071
	46.69	98.7265		45.85	98.8256		169.88	92.8065
	46.71	98.7265		45.87	98.8287		169.96	92.8059
	46.71	98.7265		45.9	98.8287		170.03	92.8059
	46.75	98.7265		45.91	98.8318		170.13	92.8059
	46.77	98.7192		45.94	98.8256		170.21	92.8053
	46.79	98.7192		45.94	98.8163		170.29	92.8046
	46.79	98.7118		45.97	98.8163		170.38	92.804
	46.81	98.7118		45.99	98.8194		170.46	92.804
	46.85	98.7118		46	98.8101		170.55	92.8034
	46.86	98.7118		46.03	98.8101		170.65	92.8028
	46.86	98.7118		46.04	98.8101		170.72	92.8016
	46.89	98.7045		46.05	98.8101		170.81	92.8016
	46.91	98.7045		46.07	98.8039		170.89	92.801
	46.93	98.7045		46.1	98.7915		170.98	92.801
	46.95	98.7118		46.11	98.7946		171.05	92.8003
	46.96	98.7045		46.13	98.7946		171.13	92.7997
	46.99	98.7045		46.15	98.7884		171.21	92.7991
	47	98.7045		46.16	98.7915		171.32	92.7985
	47.03	98.7045		46.2	98.7884		171.39	92.7985
	47.03	98.6972		46.2	98.7884		171.47	92.7973
	47.07	98.7045		46.23	98.7884		171.55	92.7966
	47.1	98.6972		46.24	98.7853		171.64	92.7966
	47.1	98.6972		46.27	98.776		171.73	92.796
	47.11	98.6972		46.28	98.776		171.8	92.796
	47.13	98.6972		46.3	98.7791		171.89	92.796
	47.16	98.6972		46.33	98.7699		171.98	92.7954
	47.18	98.6899		46.33	98.7699		172.07	92.7954
	47.2	98.6972		46.35	98.776		172.15	92.7948
	47.2	98.6899		46.37	98.7699		172.22	92.7942
	47.24	98.6899		46.41	98.7668		172.31	92.7942
	47.24	98.6826		46.42	98.7575		172.4	92.7936
	47.27	98.6826		46.43	98.7605		172.49	92.7936
	47.29	98.6826		46.44	98.7636		172.57	92.793
	47.32	98.6753		46.46	98.7605		172.67	92.793
	47.33	98.6753		46.48	98.7544		172.73	92.7923
	47.34	98.6753		46.52	98.7544		172.83	92.7923
	47.37	98.6753		46.53	98.7481		172.91	92.7917
	47.38	98.6753		46.56	98.7512		172.99	92.7917
	47.4	98.6753		46.56	98.7481		173.08	92.7917
	47.42	98.6753		46.59	98.7388		173.17	92.7911
	47.43	98.6753		46.6	98.7388		173.25	92.7905
	47.46	98.6753		46.61	98.7388		173.33	92.7899
	47.48	98.6753		46.64	98.7357		173.42	92.7905
	47.5	98.6679		46.67	98.7357		173.5	92.7905
	47.51	98.6679		46.67	98.7357		173.58	92.7893
	47.53	98.6753		46.7	98.7296		173.66	92.7893
	47.56	98.6753		46.71	98.7264		173.75	92.7893
	47.58	98.6679		46.75	98.7296		173.84	92.7887
	47.6	98.6679		46.77	98.7264		173.92	92.788
	47.61	98.6679		46.78	98.7296		174	92.7874
	47.64	98.6679		46.78	98.7233		174.1	92.7874
	47.65	98.6679		46.82	98.7233		174.18	92.7874
	47.68	98.6679		46.84	98.7233		174.26	92.7868
	47.69	98.6679		46.84	98.7233		174.35	92.7868
	47.7	98.6606		46.87	98.7202		174.43	92.7862
	47.72	98.6606		46.91	98.7172		174.51	92.7856
	47.75	98.6679		46.92	98.7109		174.59	92.7856
	47.77	98.6606		46.92	98.7172		174.67	92.785
	47.8	98.6606		46.96	98.7109		174.76	92.785
	47.82	98.6606		46.98	98.7078		174.84	92.785
	47.82	98.6606		46.98	98.7048		174.93	92.7843
	47.85	98.6606		46.99	98.7078		175.01	92.7837
	47.86	98.6533		47.02	98.7017		175.1	92.7831
	47.88	98.6533		47.04	98.7048		175.18	92.7831
	47.88	98.6533		47.06	98.7109		175.26	92.7825
	47.92	98.646		47.07	98.7017		175.35	92.7819
	47.93	98.646		47.08	98.6985		175.43	92.7819
	47.94	98.646		47.13	98.7017		175.53	92.7813
	47.97	98.646		47.15	98.6985		175.6	92.7813
	48	98.646		47.15	98.7017		175.7	92.7813
	48.02	98.646		47.17	98.7017		175.77	92.7806
	48.02	98.646		47.19	98.6924		175.86	92.7806
	48.05	98.646		47.21	98.6893		175.95	92.78
	48.08	98.646		47.23	98.6924		176.03	92.78
	48.09	98.646		47.26	98.6924		176.1	92.7794
	48.1	98.646		47.26	98.6862		176.19	92.7788
	48.11	98.6387		47.3	98.6862		176.28	92.7782
	48.14	98.646		47.3	98.6831		176.37	92.7776
	48.18	98.6387		47.31	98.6831		176.44	92.7776
	48.18	98.6387		47.35	98.6831		176.53	92.777
	48.21	98.6387		47.35	98.6769		176.62	92.7763
	48.22	98.6387		47.39	98.6769		176.72	92.7763
	48.24	98.6387		47.4	98.6769		176.78	92.7757
	48.25	98.6387		47.43	98.6645		176.88	92.7757
	48.27	98.6387		47.43	98.6614		176.96	92.7757
	48.29	98.6387		47.45	98.6645		177.04	92.7751
	48.32	98.6313		47.47	98.649		177.12	92.7751
	48.35	98.6313		47.49	98.6428		177.21	92.7751
	48.35	98.6313		47.51	98.649		177.29	92.7745
	48.38	98.6313		47.53	98.6428		177.38	92.7745
	48.4	98.6313		47.55	98.6366		177.46	92.7739
	48.41	98.6313		47.56	98.6366		177.55	92.7733
	48.43	98.6313		47.58	98.6335		177.64	92.7726
	48.45	98.624		47.58	98.6304		177.72	92.7726
	48.47	98.624		47.62	98.6335		177.8	92.7726
	48.48	98.624		47.64	98.6242		177.89	92.772
	48.52	98.624		47.66	98.6273		177.97	92.7714
	48.54	98.624		47.67	98.618		178.06	92.7714
	48.54	98.6167		47.7	98.6273		178.13	92.7708
	48.56	98.6167		47.72	98.6273		178.23	92.7708
	48.58	98.6167		47.74	98.6211		178.31	92.7702
	48.61	98.6167		47.74	98.6273		178.4	92.7702
	48.62	98.6167		47.76	98.6366		178.46	92.7696
	48.64	98.6167		47.79	98.6211		178.56	92.7683
	48.66	98.6167		47.8	98.6211		178.64	92.7683
	48.68	98.6167		47.83	98.6211		178.73	92.7671
	48.7	98.6167		47.87	98.6118		178.82	92.7671
	48.71	98.6167		47.88	98.6118		178.9	92.7665
	48.73	98.6167		47.9	98.6087		178.98	92.7665
	48.75	98.6167		47.91	98.6118		179.06	92.7659
	48.78	98.6094		47.93	98.6118		179.15	92.7653
	48.8	98.6094		47.95	98.6056		179.24	92.7647
	48.81	98.6094		47.96	98.5932		179.33	92.7647
	48.83	98.6094		47.98	98.5901		179.41	92.7647
	48.86	98.6094		48	98.5932		179.5	92.764
	48.88	98.6094		48.03	98.5777		179.58	92.764
	48.91	98.6094		48.04	98.5653		179.67	92.764
	48.91	98.6094		48.06	98.5808		179.75	92.7634
	48.93	98.6094		48.08	98.5746		179.84	92.7628
	48.95	98.6094		48.09	98.5622		179.93	92.7628
	48.97	98.6021		48.12	98.5684		180.01	92.7628
	49	98.6021		48.13	98.5715		180.09	92.7628
	49.01	98.5947		48.16	98.5653		180.18	92.7628
	49.03	98.6021		48.17	98.5529		180.27	92.7622
	49.05	98.5947		48.19	98.5529		180.35	92.7622
	49.07	98.5947		48.21	98.5498		180.43	92.7616
	49.1	98.5947		48.22	98.5529		180.51	92.7616
	49.11	98.5947		48.26	98.5436		180.61	92.7616
	49.12	98.5947		48.28	98.5405		180.69	92.7616
	49.13	98.5947		48.3	98.5498		180.77	92.761
	49.15	98.5874		48.3	98.5467		180.85	92.761
	49.18	98.5874		48.33	98.5374		180.94	92.761
	49.18	98.5874		48.35	98.5312		181.03	92.761
	49.22	98.5947		48.37	98.5374		181.12	92.7604
	49.25	98.5874		48.38	98.5343		181.19	92.7604
	49.26	98.5874		48.4	98.5219		181.27	92.7597
	49.28	98.5874		48.42	98.525		181.36	92.7597
	49.29	98.5874		48.44	98.5312		181.45	92.7597
	49.34	98.5874		48.44	98.525		181.53	92.7604
	49.34	98.5874		48.49	98.5219		181.62	92.7591
	49.35	98.5947		48.51	98.5188		181.69	92.7585
	49.38	98.5874		48.51	98.5157		181.78	92.7591
	49.39	98.5874		48.54	98.5157		181.86	92.7585
	49.41	98.5801		48.54	98.5095		181.95	92.7579
	49.42	98.5801		48.59	98.5002		182.03	92.7561
	49.47	98.5801		48.61	98.5033		182.13	92.7493
	49.49	98.5801		48.6	98.4971		182.2	92.745
	49.49	98.5728		48.63	98.5064		182.29	92.7425
	49.51	98.5728		48.66	98.5033		182.39	92.7382
	49.53	98.5728		48.68	98.5002		182.46	92.7407
	49.56	98.5728		48.68	98.5064		182.55	92.7394
	49.57	98.5728		48.7	98.4909		182.63	92.7407
	49.59	98.5728		48.73	98.494		182.72	92.7394
	49.61	98.5728		48.75	98.494		182.81	92.7382
	49.63	98.5655		48.76	98.4909		182.89	92.7382
	49.64	98.5728		48.79	98.4878		182.97	92.7388
	49.66	98.5655		48.8	98.4785		183.06	92.7376
	49.69	98.5655		48.83	98.4785		183.16	92.7376
	49.72	98.5655		48.83	98.4847		183.23	92.7376
	49.72	98.5655		48.86	98.4847		183.31	92.7376
	49.74	98.5655		48.89	98.4754		183.4	92.737
	49.75	98.5655		48.9	98.4816		183.49	92.737
	49.8	98.5581		48.91	98.4692		183.57	92.737
	49.8	98.5581		48.93	98.4692		183.66	92.7364
	49.82	98.5581		48.96	98.463		183.75	92.7357
	49.84	98.5508		48.98	98.4599		183.83	92.7357
	49.86	98.5508		48.98	98.4599		183.91	92.7351
	49.9	98.5508		49.01	98.4537		184.01	92.7351
	49.89	98.5508		49.04	98.4475		184.09	92.7351
	49.91	98.5508		49.05	98.4506		184.17	92.7351
	49.95	98.5508		49.08	98.4506		184.25	92.7345
	49.96	98.5508		49.08	98.4475		184.34	92.7345
	49.95	98.5508		49.12	98.4506		184.42	92.7339
	49.99	98.5508		49.14	98.432		184.51	92.7339
	50.01	98.5508		49.15	98.432		184.6	92.7339
	50.04	98.5508		49.16	98.4351		184.68	92.7339
	50.05	98.5508		49.18	98.4289		184.75	92.7333
	50.06	98.5435		49.21	98.4289		184.85	92.7327
	50.11	98.5435		49.22	98.4196		184.93	92.7327
	50.12	98.5435		49.24	98.4227		185.02	92.7327
	50.13	98.5435		49.26	98.4103		185.1	92.7321
	50.15	98.5435		49.3	98.4165		185.19	92.7321
	50.19	98.5435		49.3	98.4165		185.28	92.7314
	50.2	98.5435		49.31	98.4134		185.36	92.7314
	50.21	98.5362		49.35	98.4103		185.45	92.7314
	50.23	98.5362		49.36	98.4072		185.52	92.7314
	50.25	98.5362		49.38	98.4103		185.63	92.7308
	50.28	98.5362		49.39	98.4134		185.71	92.7308
	50.29	98.5362		49.42	98.4041		185.79	92.7302
	50.3	98.5362		49.42	98.4072		185.87	92.7302
	50.33	98.5362		49.44	98.4041		185.96	92.7302
	50.35	98.5362		49.48	98.4072		186.05	92.7296
	50.37	98.5289		49.49	98.3948		186.14	92.7296
	50.38	98.5289		49.5	98.3979		186.22	92.7296
[truncated: 40,245 more rows]

## Sheet: FTIR analysis
		HNTs	[Bmim][Cl]	HNTs - [Bmim][Cl]
	Wavelength	Transmittance
	4000	54.06	100.79	100.29
	3999	54.03	100.79	100.28
	3998	54	100.78	100.28
	3997	53.98	100.78	100.27
	3996	53.95	100.77	100.26
	3995	53.93	100.77	100.26
	3994	53.9	100.77	100.26
	3993	53.88	100.77	100.26
	3992	53.86	100.76	100.26
	3991	53.84	100.76	100.26
	3990	53.82	100.76	100.26
	3989	53.8	100.76	100.27
	3988	53.78	100.76	100.27
	3987	53.76	100.76	100.27
	3986	53.74	100.76	100.27
	3985	53.72	100.76	100.27
	3984	53.7	100.76	100.27
	3983	53.68	100.76	100.27
	3982	53.65	100.76	100.27
	3981	53.63	100.76	100.26
	3980	53.61	100.76	100.26
	3979	53.58	100.76	100.25
	3978	53.55	100.76	100.25
	3977	53.53	100.76	100.24
	3976	53.5	100.76	100.24
	3975	53.48	100.76	100.23
	3974	53.45	100.77	100.23
	3973	53.43	100.77	100.22
	3972	53.42	100.77	100.22
	3971	53.4	100.77	100.22
	3970	53.38	100.78	100.22
	3969	53.36	100.78	100.21
	3968	53.34	100.78	100.21
	3967	53.32	100.78	100.21
	3966	53.3	100.78	100.21
	3965	53.27	100.78	100.2
	3964	53.25	100.78	100.2
	3963	53.22	100.79	100.2
	3962	53.19	100.79	100.2
	3961	53.17	100.79	100.2
	3960	53.14	100.79	100.19
	3959	53.12	100.79	100.19
	3958	53.09	100.79	100.19
	3957	53.06	100.79	100.18
	3956	53.03	100.79	100.17
	3955	52.99	100.78	100.16
	3954	52.95	100.78	100.14
	3953	52.9	100.78	100.13
	3952	52.85	100.77	100.11
	3951	52.8	100.77	100.09
	3950	52.74	100.77	100.07
	3949	52.69	100.77	100.06
	3948	52.65	100.77	100.05
	3947	52.61	100.77	100.04
	3946	52.58	100.77	100.03
	3945	52.55	100.77	100.04
	3944	52.54	100.78	100.04
	3943	52.53	100.78	100.05
	3942	52.53	100.78	100.05
	3941	52.53	100.78	100.06
	3940	52.53	100.78	100.06
	3939	52.51	100.78	100.07
	3938	52.49	100.78	100.07
	3937	52.46	100.78	100.06
	3936	52.41	100.78	100.05
	3935	52.36	100.78	100.04
	3934	52.31	100.78	100.02
	3933	52.26	100.78	100.01
	3932	52.22	100.78	99.99
	3931	52.18	100.78	99.98
	3930	52.14	100.78	99.97
	3929	52.11	100.78	99.96
	3928	52.08	100.79	99.96
	3927	52.05	100.79	99.96
	3926	52.02	100.79	99.95
	3925	52	100.78	99.94
	3924	51.97	100.78	99.93
	3923	51.94	100.78	99.92
	3922	51.91	100.78	99.91
	3921	51.89	100.77	99.9
	3920	51.87	100.77	99.9
	3919	51.86	100.77	99.9
	3918	51.86	100.77	99.92
	3917	51.87	100.77	99.94
	3916	51.88	100.77	99.96
	3915	51.9	100.77	99.99
	3914	51.91	100.77	100.01
	3913	51.91	100.77	100.03
	3912	51.9	100.77	100.03
	3911	51.86	100.77	100.01
	3910	51.81	100.77	99.98
	3909	51.73	100.76	99.93
	3908	51.63	100.76	99.86
	3907	51.51	100.76	99.78
	3906	51.39	100.75	99.7
	3905	51.26	100.75	99.62
	3904	51.15	100.74	99.56
	3903	51.06	100.74	99.52
	3902	51	100.74	99.51
	3901	50.96	100.74	99.51
	3900	50.94	100.74	99.54
	3899	50.96	100.73	99.58
	3898	50.98	100.73	99.62
	3897	51	100.73	99.67
	3896	51.03	100.72	99.71
	3895	51.04	100.72	99.74
	3894	51.05	100.71	99.75
	3893	51.04	100.71	99.76
	3892	51.01	100.71	99.76
	3891	50.97	100.7	99.75
	3890	50.93	100.7	99.73
	3889	50.88	100.69	99.72
	3888	50.81	100.69	99.7
	3887	50.74	100.68	99.69
	3886	50.67	100.68	99.68
	3885	50.61	100.67	99.67
	3884	50.56	100.67	99.66
	3883	50.51	100.67	99.65
	3882	50.47	100.67	99.66
	3881	50.45	100.67	99.66
	3880	50.44	100.67	99.66
	3879	50.44	100.67	99.67
	3878	50.43	100.67	99.66
	3877	50.41	100.67	99.66
	3876	50.38	100.67	99.65
	3875	50.34	100.68	99.63
	3874	50.31	100.68	99.6
	3873	50.25	100.68	99.57
	3872	50.19	100.68	99.54
	3871	50.12	100.68	99.51
	3870	50.06	100.68	99.5
	3869	50.02	100.68	99.49
	3868	49.97	100.69	99.49
	3867	49.92	100.69	99.5
	3866	49.89	100.69	99.53
	3865	49.87	100.68	99.56
	3864	49.87	100.68	99.58
	3863	49.87	100.68	99.59
	3862	49.87	100.68	99.58
	3861	49.87	100.67	99.57
	3860	49.87	100.67	99.53
	3859	49.87	100.66	99.48
	3858	49.86	100.65	99.42
	3857	49.83	100.65	99.36
	3856	49.79	100.64	99.3
	3855	49.74	100.63	99.28
	3854	49.69	100.62	99.28
	3853	49.63	100.62	99.3
	3852	49.58	100.62	99.35
	3851	49.52	100.63	99.42
	3850	49.46	100.64	99.51
	3849	49.4	100.65	99.59
	3848	49.36	100.66	99.65
	3847	49.31	100.67	99.68
	3846	49.25	100.68	99.68
	3845	49.19	100.68	99.65
	3844	49.13	100.69	99.61
	3843	49.06	100.69	99.55
	3842	48.99	100.68	99.48
	3841	48.91	100.68	99.42
	3840	48.84	100.67	99.37
	3839	48.76	100.66	99.35
	3838	48.7	100.66	99.34
	3837	48.65	100.66	99.35
	3836	48.61	100.66	99.38
	3835	48.58	100.67	99.43
	3834	48.56	100.68	99.48
	3833	48.54	100.69	99.53
	3832	48.54	100.7	99.58
	3831	48.53	100.7	99.61
	3830	48.51	100.71	99.64
	3829	48.48	100.71	99.64
	3828	48.44	100.71	99.63
	3827	48.39	100.71	99.61
	3826	48.33	100.71	99.56
	3825	48.25	100.7	99.51
	3824	48.17	100.7	99.45
	3823	48.08	100.7	99.4
	3822	48	100.69	99.37
	3821	47.93	100.69	99.34
	3820	47.87	100.69	99.33
	3819	47.81	100.69	99.35
	3818	47.76	100.69	99.38
	3817	47.73	100.69	99.44
	3816	47.71	100.7	99.5
	3815	47.7	100.71	99.55
	3814	47.68	100.72	99.6
	3813	47.66	100.72	99.64
	3812	47.63	100.73	99.66
	3811	47.59	100.73	99.66
	3810	47.54	100.74	99.64
	3809	47.47	100.74	99.61
	3808	47.38	100.73	99.56
	3807	47.28	100.73	99.52
	3806	47.18	100.72	99.47
	3805	47.06	100.72	99.42
	3804	46.93	100.72	99.39
	3803	46.8	100.73	99.37
	3802	46.68	100.73	99.37
	3801	46.58	100.73	99.38
	3800	46.48	100.74	99.4
	3799	46.38	100.75	99.43
	3798	46.3	100.76	99.47
	3797	46.24	100.77	99.52
	3796	46.19	100.77	99.57
	3795	46.14	100.78	99.61
	3794	46.08	100.78	99.65
	3793	46.03	100.78	99.68
	3792	45.97	100.78	99.71
	3791	45.9	100.78	99.72
	3790	45.82	100.78	99.72
	3789	45.73	100.78	99.71
	3788	45.62	100.78	99.7
	3787	45.5	100.78	99.68
	3786	45.38	100.77	99.65
	3785	45.25	100.77	99.63
	3784	45.12	100.76	99.6
	3783	44.98	100.76	99.57
	3782	44.85	100.76	99.55
	3781	44.72	100.76	99.53
	3780	44.59	100.76	99.52
	3779	44.48	100.76	99.51
	3778	44.37	100.77	99.5
	3777	44.25	100.77	99.5
	3776	44.14	100.77	99.49
	3775	44.02	100.77	99.47
	3774	43.9	100.77	99.44
	3773	43.76	100.77	99.41
	3772	43.6	100.77	99.38
	3771	43.43	100.77	99.34
	3770	43.26	100.77	99.31
	3769	43.08	100.77	99.27
	3768	42.9	100.77	99.24
	3767	42.72	100.77	99.22
	3766	42.54	100.77	99.19
	3765	42.37	100.77	99.17
	3764	42.19	100.77	99.14
	3763	42.01	100.77	99.11
	3762	41.83	100.77	99.08
	3761	41.64	100.77	99.03
	3760	41.44	100.76	98.98
	3759	41.25	100.76	98.91
	3758	41.05	100.74	98.84
	3757	40.85	100.73	98.75
	3756	40.65	100.71	98.66
	3755	40.45	100.69	98.56
	3754	40.24	100.66	98.46
	3753	40.02	100.64	98.37
	3752	39.77	100.62	98.28
	3751	39.5	100.6	98.21
	3750	39.21	100.59	98.15
	3749	38.9	100.58	98.11
	3748	38.58	100.58	98.08
	3747	38.24	100.59	98.06
	3746	37.9	100.6	98.06
	3745	37.56	100.61	98.07
	3744	37.23	100.62	98.06
	3743	36.9	100.64	98.05
	3742	36.56	100.65	98.03
	3741	36.21	100.67	97.99
	3740	35.84	100.68	97.93
	3739	35.46	100.7	97.86
	3738	35.05	100.71	97.76
	3737	34.62	100.71	97.67
	3736	34.18	100.72	97.58
	3735	33.73	100.71	97.5
	3734	33.28	100.71	97.43
	3733	32.82	100.71	97.38
	3732	32.37	100.71	97.34
	3731	31.91	100.71	97.31
	3730	31.43	100.71	97.26
	3729	30.91	100.72	97.2
	3728	30.36	100.73	97.11
	3727	29.75	100.74	96.99
	3726	29.08	100.75	96.84
	3725	28.36	100.76	96.66
	3724	27.59	100.77	96.45
	3723	26.77	100.78	96.22
	3722	25.92	100.78	95.97
	3721	25.06	100.78	95.7
	3720	24.18	100.78	95.39
	3719	23.29	100.78	95.05
	3718	22.39	100.77	94.67
	3717	21.47	100.76	94.22
	3716	20.51	100.75	93.71
	3715	19.5	100.75	93.14
	3714	18.44	100.74	92.49
	3713	17.32	100.73	91.78
	3712	16.17	100.73	91
	3711	15	100.73	90.17
	3710	13.85	100.73	89.29
	3709	12.75	100.73	88.37
	3708	11.73	100.74	87.41
	3707	10.8	100.74	86.39
	3706	9.95	100.75	85.33
	3705	9.19	100.75	84.22
	3704	8.5	100.76	83.06
	3703	7.88	100.76	81.88
	3702	7.32	100.77	80.69
	3701	6.82	100.77	79.53
	3700	6.4	100.77	78.42
	3699	6.05	100.78	77.4
	3698	5.78	100.78	76.5
	3697	5.6	100.78	75.72
	3696	5.5	100.78	75.09
	3695	5.47	100.79	74.62
	3694	5.51	100.79	74.31
	3693	5.61	100.79	74.17
	3692	5.77	100.78	74.19
	3691	5.99	100.78	74.36
	3690	6.25	100.77	74.68
	3689	6.56	100.77	75.1
	3688	6.91	100.76	75.61
	3687	7.29	100.75	76.15
	3686	7.7	100.75	76.71
	3685	8.12	100.74	77.24
	3684	8.56	100.74	77.74
	3683	9	100.74	78.17
	3682	9.44	100.73	78.55
	3681	9.87	100.73	78.86
	3680	10.27	100.72	79.12
	3679	10.66	100.7	79.33
	3678	11.01	100.69	79.5
	3677	11.32	100.68	79.65
	3676	11.59	100.67	79.77
	3675	11.82	100.66	79.89
	3674	12.01	100.65	79.99
	3673	12.17	100.65	80.09
	3672	12.29	100.65	80.2
	3671	12.39	100.66	80.32
	3670	12.47	100.67	80.44
	3669	12.54	100.69	80.57
	3668	12.6	100.7	80.7
	3667	12.65	100.72	80.82
	3666	12.7	100.73	80.93
	3665	12.74	100.74	81.03
	3664	12.77	100.74	81.09
	3663	12.8	100.74	81.13
	3662	12.8	100.74	81.14
	3661	12.8	100.74	81.13
	3660	12.77	100.73	81.09
	3659	12.74	100.72	81.02
	3658	12.68	100.72	80.93
	3657	12.62	100.71	80.82
	3656	12.55	100.7	80.7
	3655	12.47	100.68	80.56
	3654	12.37	100.68	80.42
	3653	12.26	100.67	80.28
	3652	12.13	100.66	80.14
	3651	11.99	100.66	80.02
	3650	11.83	100.66	79.92
	3649	11.66	100.66	79.84
	3648	11.48	100.67	79.77
	3647	11.3	100.67	79.7
	3646	11.13	100.68	79.62
	3645	10.96	100.68	79.53
	3644	10.79	100.69	79.4
	3643	10.61	100.69	79.23
	3642	10.43	100.69	79.01
	3641	10.22	100.69	78.74
	3640	10	100.69	78.41
	3639	9.76	100.69	78.01
	3638	9.51	100.68	77.56
	3637	9.24	100.67	77.04
	3636	8.97	100.66	76.46
	3635	8.69	100.65	75.82
	3634	8.41	100.64	75.15
	3633	8.11	100.63	74.43
	3632	7.81	100.62	73.7
	3631	7.49	100.62	72.97
	3630	7.16	100.61	72.27
	3629	6.83	100.6	71.6
	3628	6.51	100.6	70.97
	3627	6.21	100.6	70.41
	3626	5.95	100.59	69.93
	3625	5.74	100.58	69.54
	3624	5.59	100.58	69.25
	3623	5.51	100.57	69.08
	3622	5.5	100.56	69.06
	3621	5.57	100.56	69.18
	3620	5.73	100.55	69.47
	3619	5.96	100.54	69.9
	3618	6.26	100.53	70.46
	3617	6.63	100.51	71.1
	3616	7.05	100.5	71.79
	3615	7.5	100.48	72.5
	3614	7.97	100.47	73.21
	3613	8.45	100.45	73.89
	3612	8.91	100.44	74.52
	3611	9.34	100.43	75.12
	3610	9.73	100.42	75.68
	3609	10.1	100.42	76.19
	3608	10.42	100.41	76.67
	3607	10.72	100.41	77.1
	3606	11	100.41	77.48
	3605	11.27	100.4	77.81
	3604	11.54	100.4	78.1
	3603	11.82	100.39	78.35
	3602	12.12	100.38	78.57
	3601	12.42	100.38	78.75
	3600	12.75	100.37	78.91
	3599	13.09	100.36	79.06
	3598	13.44	100.35	79.19
	3597	13.79	100.33	79.31
	3596	14.13	100.32	79.41
	3595	14.45	100.31	79.51
	3594	14.76	100.29	79.59
	3593	15.04	100.27	79.66
	3592	15.29	100.26	79.73
	3591	15.52	100.25	79.8
	3590	15.71	100.24	79.86
	3589	15.89	100.23	79.94
	3588	16.05	100.22	80.03
	3587	16.19	100.21	80.12
	3586	16.33	100.19	80.21
	3585	16.47	100.18	80.31
	3584	16.6	100.16	80.4
	3583	16.73	100.14	80.49
	3582	16.86	100.12	80.56
	3581	16.99	100.1	80.62
	3580	17.1	100.08	80.68
	3579	17.22	100.07	80.72
	3578	17.31	100.05	80.75
	3577	17.4	100.04	80.76
	3576	17.47	100.02	80.76
	3575	17.53	100.01	80.74
	3574	17.58	99.99	80.69
	3573	17.61	99.97	80.63
	3572	17.63	99.95	80.56
	3571	17.65	99.93	80.47
	3570	17.65	99.91	80.39
	3569	17.65	99.89	80.3
	3568	17.65	99.87	80.21
	3567	17.64	99.86	80.13
	3566	17.64	99.84	80.05
	3565	17.64	99.83	79.96
	3564	17.64	99.81	79.86
	3563	17.66	99.79	79.74
	3562	17.68	99.77	79.61
	3561	17.7	99.75	79.46
	3560	17.73	99.73	79.29
	3559	17.75	99.71	79.1
	3558	17.77	99.69	78.9
	3557	17.79	99.67	78.69
	3556	17.8	99.66	78.47
	3555	17.8	99.64	78.26
	3554	17.8	99.63	78.04
	3553	17.79	99.61	77.84
	3552	17.79	99.59	77.66
	3551	17.78	99.57	77.49
	3550	17.78	99.56	77.35
	3549	17.78	99.54	77.23
	3548	17.79	99.52	77.14
	3547	17.81	99.5	77.08
	3546	17.84	99.48	77.05
	3545	17.89	99.46	77.04
	3544	17.95	99.45	77.05
	3543	18.02	99.43	77.07
	3542	18.1	99.41	77.1
	3541	18.19	99.38	77.13
	3540	18.28	99.36	77.16
	3539	18.37	99.33	77.19
	3538	18.46	99.3	77.22
	3537	18.54	99.27	77.24
	3536	18.62	99.25	77.27
	3535	18.7	99.22	77.28
	3534	18.78	99.19	77.3
	3533	18.86	99.16	77.31
	3532	18.93	99.14	77.31
	3531	18.99	99.11	77.32
	3530	19.05	99.07	77.32
	3529	19.1	99.04	77.32
	3528	19.14	99.01	77.32
	3527	19.19	98.98	77.32
	3526	19.23	98.95	77.32
	3525	19.28	98.92	77.33
	3524	19.33	98.89	77.34
	3523	19.39	98.86	77.34
	3522	19.46	98.82	77.35
	3521	19.53	98.79	77.35
	3520	19.6	98.76	77.35
	3519	19.67	98.72	77.34
	3518	19.74	98.69	77.33
	3517	19.8	98.65	77.31
	3516	19.86	98.62	77.28
	3515	19.91	98.59	77.24
	3514	19.96	98.55	77.21
	3513	20	98.52	77.17
	3512	20.05	98.48	77.13
	3511	20.09	98.44	77.09
	3510	20.13	98.4	77.05
	3509	20.17	98.36	77
	3508	20.2	98.31	76.96
	3507	20.23	98.27	76.92
	3506	20.25	98.23	76.87
	3505	20.27	98.18	76.83
	3504	20.29	98.14	76.79
	3503	20.31	98.1	76.76
	3502	20.33	98.06	76.72
	3501	20.36	98.02	76.68
	3500	20.4	97.98	76.65
	3499	20.44	97.93	76.61
	3498	20.48	97.89	76.56
	3497	20.52	97.84	76.52
	3496	20.56	97.79	76.47
	3495	20.61	97.74	76.43
	3494	20.65	97.7	76.38
	3493	20.69	97.65	76.33
	3492	20.72	97.6	76.28
	3491	20.75	97.55	76.23
	3490	20.78	97.5	76.18
	3489	20.81	97.45	76.13
	3488	20.83	97.41	76.07
	3487	20.86	97.36	76.02
	3486	20.88	97.31	75.96
	3485	20.9	97.27	75.9
	3484	20.92	97.22	75.84
	3483	20.94	97.18	75.78
	3482	20.96	97.13	75.72
	3481	20.98	97.08	75.66
	3480	21	97.03	75.61
	3479	21.03	96.98	75.55
	3478	21.06	96.93	75.49
	3477	21.09	96.87	75.43
	3476	21.12	96.82	75.37
	3475	21.14	96.77	75.31
	3474	21.16	96.72	75.25
	3473	21.18	96.68	75.19
	3472	21.19	96.63	75.13
	3471	21.2	96.59	75.06
	3470	21.21	96.54	75
	3469	21.23	96.5	74.93
	3468	21.24	96.46	74.87
	3467	21.26	96.41	74.81
	3466	21.29	96.37	74.75
	3465	21.31	96.33	74.68
	3464	21.34	96.29	74.62
	3463	21.37	96.24	74.56
	3462	21.4	96.2	74.51
	3461	21.44	96.17	74.45
	3460	21.47	96.13	74.39
	3459	21.5	96.09	74.33
	3458	21.54	96.05	74.27
	3457	21.57	96.02	74.21
	3456	21.61	95.98	74.15
	3455	21.64	95.95	74.08
	3454	21.67	95.91	74.02
	3453	21.7	95.87	73.95
	3452	21.72	95.84	73.88
	3451	21.74	95.8	73.81
	3450	21.76	95.77	73.75
	3449	21.77	95.73	73.68
	3448	21.79	95.71	73.62
	3447	21.8	95.68	73.57
	3446	21.82	95.66	73.51
	3445	21.84	95.63	73.46
	3444	21.87	95.61	73.41
	3443	21.89	95.59	73.35
	3442	21.92	95.57	73.3
	3441	21.94	95.54	73.24
	3440	21.97	95.52	73.19
	3439	21.99	95.49	73.13
	3438	22.02	95.47	73.07
	3437	22.05	95.44	73.02
	3436	22.08	95.42	72.97
	3435	22.12	95.39	72.92
	3434	22.17	95.37	72.87
	3433	22.22	95.35	72.82
	3432	22.28	95.33	72.77
	3431	22.34	95.31	72.72
	3430	22.4	95.29	72.68
	3429	22.47	95.27	72.63
	3428	22.54	95.25	72.59
	3427	22.61	95.23	72.55
	3426	22.68	95.21	72.5
	3425	22.75	95.19	72.46
	3424	22.82	95.18	72.42
	3423	22.89	95.16	72.38
	3422	22.96	95.14	72.35
	3421	23.02	95.13	72.31
	3420	23.08	95.11	72.28
	3419	23.15	95.09	72.24
	3418	23.21	95.07	72.21
	3417	23.27	95.05	72.17
	3416	23.33	95.03	72.14
	3415	23.4	95.01	72.11
	3414	23.46	95	72.08
	3413	23.52	94.98	72.06
	3412	23.59	94.96	72.03
	3411	23.66	94.94	72.01
	3410	23.73	94.93	71.98
	3409	23.8	94.91	71.96
	3408	23.87	94.89	71.94
	3407	23.94	94.87	71.91
	3406	24	94.85	71.89
	3405	24.07	94.83	71.87
	3404	24.14	94.81	71.85
	3403	24.2	94.79	71.83
	3402	24.26	94.77	71.81
	3401	24.33	94.75	71.79
	3400	24.4	94.74	71.77
	3399	24.47	94.72	71.75
	3398	24.55	94.71	71.74
	3397	24.63	94.7	71.72
	3396	24.7	94.69	71.72
	3395	24.78	94.68	71.71
	3394	24.87	94.67	71.7
	3393	24.95	94.67	71.7
	3392	25.04	94.67	71.7
	3391	25.13	94.66	71.7
	3390	25.23	94.66	71.69
	3389	25.33	94.66	71.69
	3388	25.43	94.66	71.69
	3387	25.53	94.66	71.69
	3386	25.63	94.66	71.69
	3385	25.72	94.66	71.7
	3384	25.82	94.66	71.7
	3383	25.91	94.67	71.71
	3382	25.99	94.67	71.72
	3381	26.08	94.68	71.73
	3380	26.17	94.69	71.73
	3379	26.26	94.69	71.74
	3378	26.35	94.7	71.75
	3377	26.45	94.7	71.76
	3376	26.54	94.71	71.77
	3375	26.63	94.71	71.78
	3374	26.73	94.72	71.79
	3373	26.82	94.73	71.8
	3372	26.91	94.74	71.81
	3371	27	94.75	71.83
	3370	27.09	94.77	71.84
	3369	27.19	94.78	71.86
	3368	27.29	94.8	71.88
	3367	27.39	94.82	71.9
	3366	27.5	94.84	71.93
	3365	27.61	94.86	71.95
	3364	27.73	94.88	71.98
	3363	27.84	94.91	72.01
	3362	27.96	94.93	72.04
	3361	28.07	94.95	72.07
	3360	28.19	94.98	72.1
	3359	28.3	95.01	72.13
	3358	28.42	95.04	72.16
	3357	28.53	95.07	72.2
	3356	28.64	95.1	72.23
	3355	28.75	95.14	72.26
	3354	28.85	95.17	72.3
	3353	28.96	95.2	72.34
	3352	29.06	95.24	72.37
	3351	29.17	95.27	72.41
	3350	29.28	95.31	72.45
	3349	29.39	95.34	72.49
	3348	29.5	95.38	72.53
	3347	29.61	95.41	72.57
	3346	29.72	95.45	72.61
	3345	29.83	95.49	72.64
	3344	29.93	95.53	72.68
	3343	30.04	95.57	72.71
	3342	30.14	95.61	72.75
	3341	30.24	95.66	72.79
	3340	30.35	95.7	72.83
	3339	30.46	95.75	72.87
	3338	30.57	95.8	72.92
	3337	30.68	95.84	72.96
	3336	30.8	95.89	73.01
	3335	30.92	95.94	73.06
	3334	31.03	95.98	73.11
	3333	31.15	96.03	73.15
	3332	31.26	96.07	73.2
	3331	31.37	96.12	73.24
	3330	31.47	96.16	73.28
	3329	31.57	96.21	73.33
	3328	31.67	96.26	73.37
	3327	31.77	96.3	73.41
	3326	31.87	96.35	73.45
	3325	31.97	96.4	73.49
	3324	32.08	96.44	73.53
	3323	32.18	96.49	73.57
	3322	32.29	96.53	73.62
	3321	32.4	96.57	73.66
	3320	32.51	96.62	73.7
	3319	32.61	96.66	73.75
	3318	32.71	96.7	73.79
	3317	32.8	96.74	73.83
	3316	32.89	96.78	73.88
	3315	32.98	96.82	73.92
	3314	33.07	96.87	73.96
	3313	33.15	96.91	74
	3312	33.23	96.95	74.05
	3311	33.3	97	74.09
	3310	33.38	97.04	74.14
	3309	33.46	97.09	74.18
	3308	33.55	97.13	74.22
	3307	33.63	97.18	74.26
	3306	33.72	97.22	74.3
	3305	33.81	97.26	74.34
	3304	33.91	97.3	74.39
	3303	34	97.33	74.43
	3302	34.1	97.37	74.47
	3301	34.18	97.4	74.51
	3300	34.27	97.43	74.55
	3299	34.35	97.47	74.59
	3298	34.43	97.5	74.63
	3297	34.5	97.53	74.67
	3296	34.57	97.56	74.71
	3295	34.65	97.59	74.75
	3294	34.72	97.63	74.79
	3293	34.8	97.65	74.82
	3292	34.88	97.68	74.86
	3291	34.96	97.71	74.9
	3290	35.05	97.73	74.94
	3289	35.13	97.75	74.98
	3288	35.21	97.77	75.02
	3287	35.29	97.8	75.05
	3286	35.37	97.81	75.09
	3285	35.44	97.83	75.13
	3284	35.51	97.85	75.17
	3283	35.58	97.87	75.2
	3282	35.65	97.88	75.24
	3281	35.71	97.9	75.27
	3280	35.77	97.91	75.31
	3279	35.83	97.92	75.34
	3278	35.88	97.93	75.38
	3277	35.94	97.94	75.41
	3276	35.99	97.95	75.45
	3275	36.04	97.96	75.49
	3274	36.09	97.97	75.53
	3273	36.15	97.98	75.57
	3272	36.21	97.99	75.61
	3271	36.28	98.01	75.65
	3270	36.35	98.02	75.69
	3269	36.42	98.03	75.73
	3268	36.49	98.04	75.77
	3267	36.56	98.05	75.81
	3266	36.63	98.07	75.85
	3265	36.7	98.08	75.89
	3264	36.77	98.09	75.92
	3263	36.83	98.1	75.96
	3262	36.89	98.11	76
	3261	36.94	98.13	76.04
	3260	37	98.14	76.08
	3259	37.05	98.15	76.12
	3258	37.11	98.17	76.16
	3257	37.16	98.18	76.21
	3256	37.22	98.2	76.25
	3255	37.28	98.22	76.3
	3254	37.33	98.23	76.34
	3253	37.39	98.25	76.39
	3252	37.45	98.26	76.44
	3251	37.51	98.28	76.49
	3250	37.57	98.3	76.55
	3249	37.63	98.31	76.6
	3248	37.68	98.33	76.65
	3247	37.74	98.34	76.71
	3246	37.8	98.36	76.76
	3245	37.87	98.37	76.82
	3244	37.93	98.39	76.87
	3243	38	98.4	76.93
	3242	38.06	98.42	76.99
	3241	38.13	98.43	77.04
	3240	38.19	98.44	77.1
	3239	38.25	98.46	77.16
	3238	38.31	98.47	77.22
	3237	38.37	98.48	77.28
	3236	38.43	98.5	77.34
	3235	38.48	98.51	77.41
	3234	38.54	98.52	77.47
	3233	38.61	98.54	77.53
	3232	38.67	98.55	77.59
	3231	38.74	98.57	77.65
	3230	38.82	98.58	77.71
	3229	38.89	98.59	77.78
	3228	38.97	98.61	77.85
	3227	39.04	98.63	77.92
	3226	39.11	98.64	77.99
	3225	39.18	98.66	78.07
	3224	39.25	98.68	78.14
	3223	39.31	98.7	78.22
	3222	39.38	98.72	78.29
	3221	39.44	98.74	78.37
	3220	39.51	98.77	78.44
	3219	39.57	98.79	78.51
	3218	39.64	98.81	78.59
	3217	39.71	98.83	78.67
	3216	39.78	98.84	78.74
	3215	39.85	98.86	78.83
	3214	39.92	98.87	78.91
	3213	40	98.89	79
	3212	40.07	98.9	79.08
	3211	40.14	98.92	79.17
	3210	40.22	98.93	79.26
	3209	40.29	98.95	79.35
	3208	40.36	98.97	79.43
	3207	40.43	98.99	79.52
	3206	40.51	99	79.61
	3205	40.58	99.02	79.7
	3204	40.66	99.04	79.78
	3203	40.73	99.05	79.87
	3202	40.81	99.06	79.96
	3201	40.89	99.07	80.05
	3200	40.96	99.08	80.13
	3199	41.03	99.09	80.22
	3198	41.11	99.1	80.32
	3197	41.18	99.11	80.41
	3196	41.25	99.12	80.5
	3195	41.32	99.13	80.59
	3194	41.4	99.14	80.69
	3193	41.47	99.14	80.78
	3192	41.54	99.15	80.87
	3191	41.62	99.16	80.97
	3190	41.69	99.16	81.06
	3189	41.76	99.17	81.16
	3188	41.84	99.17	81.26
	3187	41.91	99.17	81.36
	3186	41.99	99.17	81.46
	3185	42.06	99.16	81.55
	3184	42.13	99.16	81.65
	3183	42.2	99.15	81.75
	3182	42.27	99.15	81.84
	3181	42.34	99.14	81.94
	3180	42.42	99.12	82.03
	3179	42.49	99.11	82.12
	3178	42.56	99.1	82.22
	3177	42.63	99.08	82.31
	3176	42.7	99.05	82.41
	3175	42.77	99.03	82.5
	3174	42.84	98.99	82.6
	3173	42.91	98.95	82.7
	3172	42.98	98.9	82.8
	3171	43.05	98.84	82.9
	3170	43.12	98.77	83
	3169	43.18	98.69	83.1
	3168	43.25	98.59	83.2
	3167	43.32	98.48	83.3
	3166	43.38	98.34	83.4
	3165	43.45	98.16	83.5
	3164	43.51	97.95	83.6
	3163	43.57	97.69	83.7
	3162	43.63	97.37	83.8
	3161	43.69	96.98	83.9
	3160	43.75	96.54	84
	3159	43.8	96.04	84.1
	3158	43.86	95.51	84.2
	3157	43.91	94.98	84.3
	3156	43.96	94.47	84.41
	3155	44.01	94.02	84.51
	3154	44.06	93.67	84.62
	3153	44.12	93.44	84.72
	3152	44.18	93.34	84.82
	3151	44.24	93.36	84.92
	3150	44.31	93.48	85.03
	3149	44.37	93.67	85.13
	3148	44.44	93.9	85.24
	3147	44.5	94.14	85.35
	3146	44.56	94.36	85.45
	3145	44.62	94.55	85.56
	3144	44.67	94.7	85.67
	3143	44.72	94.8	85.77
	3142	44.76	94.86	85.88
	3141	44.81	94.89	85.98
	3140	44.86	94.88	86.09
	3139	44.91	94.85	86.19
	3138	44.97	94.79	86.29
	3137	45.02	94.71	86.39
	3136	45.08	94.62	86.49
	3135	45.13	94.5	86.59
	3134	45.18	94.37	86.69
	3133	45.24	94.23	86.79
	3132	45.29	94.07	86.88
	3131	45.33	93.91	86.98
	3130	45.38	93.74	87.07
	3129	45.43	93.57	87.16
	3128	45.47	93.42	87.26
	3127	45.52	93.27	87.35
	3126	45.56	93.14	87.44
	3125	45.6	93.03	87.53
	3124	45.64	92.93	87.62
	3123	45.67	92.84	87.71
	3122	45.71	92.75	87.8
	3121	45.74	92.65	87.88
	3120	45.78	92.53	87.97
	3119	45.82	92.39	88.06
	3118	45.86	92.23	88.15
	3117	45.91	92.06	88.24
	3116	45.96	91.89	88.34
	3115	46.01	91.73	88.43
	3114	46.06	91.61	88.52
	3113	46.11	91.54	88.61
	3112	46.16	91.51	88.7
	3111	46.21	91.54	88.79
	3110	46.26	91.6	88.88
	3109	46.31	91.69	88.96
	3108	46.36	91.79	89.05
	3107	46.41	91.87	89.14
	3106	46.45	91.92	89.22
	3105	46.5	91.91	89.31
	3104	46.54	91.83	89.4
	3103	46.58	91.64	89.48
	3102	46.62	91.35	89.57
	3101	46.66	90.92	89.66
	3100	46.69	90.36	89.74
	3099	46.73	89.67	89.83
	3098	46.78	88.88	89.91
	3097	46.82	88	89.99
	3096	46.86	87.1	90.08
	3095	46.9	86.22	90.16
	3094	46.94	85.43	90.24
	3093	46.97	84.77	90.32
	3092	47.01	84.3	90.4
	3091	47.04	84.03	90.48
	3090	47.07	83.96	90.56
	3089	47.1	84.09	90.64
	3088	47.14	84.38	90.72
	3087	47.17	84.79	90.8
	3086	47.2	85.28	90.88
	3085	47.24	85.8	90.96
	3084	47.27	86.33	91.04
	3083	47.3	86.83	91.12
	3082	47.34	87.29	91.19
	3081	47.37	87.7	91.27
	3080	47.41	88.07	91.35
	3079	47.45	88.38	91.42
	3078	47.49	88.66	91.5
	3077	47.54	88.89	91.57
	3076	47.58	89.09	91.65
	3075	47.63	89.26	91.72
	3074	47.67	89.41	91.79
	3073	47.71	89.53	91.86
	3072	47.75	89.64	91.93
	3071	47.79	89.73	92.01
	3070	47.82	89.81	92.08
	3069	47.85	89.88	92.15
	3068	47.88	89.94	92.22
	3067	47.91	90	92.29
	3066	47.94	90.04	92.36
	3065	47.98	90.09	92.43
	3064	48.02	90.12	92.5
	3063	48.06	90.15	92.57
	3062	48.1	90.17	92.63
	3061	48.14	90.2	92.7
	3060	48.17	90.21	92.76
	3059	48.21	90.23	92.83
	3058	48.24	90.25	92.89
	3057	48.27	90.27	92.95
	3056	48.3	90.28	93.02
	3055	48.33	90.3	93.08
	3054	48.36	90.31	93.14
	3053	48.39	90.31	93.2
	3052	48.43	90.32	93.26
	3051	48.46	90.32	93.32
	3050	48.49	90.32	93.38
	3049	48.53	90.32	93.44
	3048	48.56	90.32	93.5
	3047	48.59	90.32	93.56
	3046	48.62	90.32	93.62
	3045	48.66	90.32	93.68
	3044	48.69	90.31	93.74
	3043	48.72	90.31	93.8
	3042	48.76	90.3	93.86
	3041	48.8	90.29	93.91
	3040	48.83	90.28	93.97
	3039	48.86	90.26	94.02
	3038	48.9	90.24	94.08
	3037	48.93	90.22	94.13
	3036	48.96	90.19	94.18
	3035	48.98	90.16	94.24
	3034	49.01	90.13	94.29
	3033	49.04	90.1	94.35
	3032	49.08	90.06	94.4
	3031	49.11	90.03	94.46
	3030	49.15	89.99	94.51
	3029	49.19	89.94	94.57
	3028	49.23	89.88	94.62
	3027	49.27	89.81	94.67
	3026	49.3	89.72	94.71
	3025	49.34	89.6	94.76
	3024	49.37	89.46	94.81
	3023	49.4	89.29	94.85
	3022	49.42	89.08	94.9
	3021	49.45	88.86	94.94
	3020	49.48	88.62	94.99
	3019	49.5	88.38	95.04
	3018	49.52	88.16	95.09
	3017	49.54	87.98	95.14
	3016	49.57	87.84	95.18
	3015	49.59	87.75	95.23
	3014	49.61	87.7	95.28
	3013	49.64	87.69	95.32
	3012	49.68	87.7	95.36
	3011	49.71	87.72	95.41
	3010	49.75	87.72	95.45
	3009	49.79	87.7	95.49
	3008	49.83	87.66	95.53
	3007	49.87	87.6	95.57
	3006	49.91	87.52	95.61
	3005	49.94	87.44	95.65
	3004	49.97	87.36	95.69
	3003	50	87.3	95.73
	3002	50.03	87.25	95.77
	3001	50.06	87.23	95.81
	3000	50.08	87.23	95.85
	2999	50.11	87.23	95.89
	2998	50.13	87.23	95.93
	2997	50.16	87.23	95.96
	2996	50.18	87.2	96
	2995	50.21	87.13	96.04
	2994	50.23	87.01	96.08
	2993	50.26	86.83	96.11
	2992	50.29	86.58	96.15
	2991	50.32	86.26	96.18
	2990	50.35	85.85	96.21
	2989	50.38	85.37	96.25
	2988	50.41	84.81	96.28
	2987	50.44	84.17	96.31
	2986	50.47	83.48	96.35
	2985	50.49	82.72	96.38
	2984	50.52	81.91	96.42
	2983	50.54	81.05	96.46
	2982	50.56	80.15	96.49
	2981	50.58	79.22	96.53
	2980	50.6	78.28	96.56
	2979	50.63	77.36	96.6
	2978	50.65	76.47	96.64
	2977	50.68	75.64	96.68
	2976	50.71	74.9	96.72
	2975	50.74	74.24	96.76
	2974	50.77	73.67	96.8
	2973	50.8	73.19	96.85
	2972	50.83	72.79	96.9
	2971	50.86	72.45	96.96
	2970	50.89	72.17	97.02
	2969	50.91	71.96	97.08
	2968	50.94	71.81	97.14
	2967	50.96	71.72	97.2
	2966	50.99	71.7	97.27
	2965	51.01	71.74	97.33
	2964	51.03	71.84	97.39
	2963	51.06	71.97	97.45
	2962	51.08	72.11	97.51
	2961	51.1	72.24	97.56
	2960	51.13	72.33	97.61
	2959	51.15	72.37	97.65
	2958	51.17	72.33	97.68
	2957	51.19	72.23	97.7
	2956	51.21	72.08	97.72
	2955	51.23	71.89	97.72
	2954	51.25	71.72	97.73
	2953	51.27	71.59	97.72
	2952	51.28	71.53	97.72
	2951	51.3	71.57	97.71
	2950	51.32	71.7	97.7
	2949	51.34	71.92	97.7
	2948	51.36	72.2	97.7
	2947	51.38	72.5	97.71
	2946	51.4	72.78	97.71
	2945	51.42	73.02	97.73
	2944	51.44	73.18	97.74
	2943	51.47	73.26	97.76
	2942	51.49	73.25	97.78
	2941	51.52	73.19	97.8
	2940	51.54	73.08	97.82
	2939	51.56	72.96	97.85
	2938	51.58	72.87	97.87
	2937	51.6	72.82	97.89
	2936	51.61	72.84	97.92
	2935	51.63	72.94	97.94
	2934	51.64	73.14	97.97
	2933	51.65	73.42	98
	2932	51.66	73.78	98.03
	2931	51.67	74.2	98.06
	2930	51.69	74.67	98.09
	2929	51.71	75.17	98.12
	2928	51.73	75.7	98.16
	2927	51.75	76.26	98.19
	2926	51.77	76.83	98.23
	2925	51.79	77.41	98.27
	2924	51.81	78.02	98.31
	2923	51.83	78.63	98.35
	2922	51.85	79.24	98.39
	2921	51.87	79.84	98.43
	2920	51.88	80.42	98.47
	2919	51.9	80.97	98.51
	2918	51.92	81.48	98.55
	2917	51.94	81.93	98.58
	2916	51.96	82.32	98.61
	2915	51.99	82.66	98.63
	2914	52.01	82.93	98.64
	2913	52.04	83.15	98.66
	2912	52.07	83.33	98.66
	2911	52.1	83.49	98.67
	2910	52.14	83.63	98.67
	2909	52.16	83.79	98.68
	2908	52.19	83.96	98.69
	2907	52.22	84.15	98.69
	2906	52.25	84.37	98.7
	2905	52.27	84.61	98.71
	2904	52.29	84.87	98.72
	2903	52.31	85.14	98.74
	2902	52.33	85.41	98.75
	2901	52.35	85.69	98.76
	2900	52.37	85.96	98.78
	2899	52.39	86.22	98.8
	2898	52.41	86.48	98.81
	2897	52.43	86.73	98.83
	2896	52.45	86.98	98.85
	2895	52.47	87.22	98.86
	2894	52.49	87.46	98.88
	2893	52.51	87.69	98.9
	2892	52.53	87.92	98.91
	2891	52.55	88.14	98.93
	2890	52.57	88.35	98.94
	2889	52.59	88.53	98.95
	2888	52.61	88.68	98.97
	2887	52.62	88.78	98.98
	2886	52.64	88.81	98.99
	2885	52.66	88.73	99
	2884	52.67	88.53	99.02
	2883	52.68	88.17	99.03
	2882	52.7	87.61	99.05
	2881	52.71	86.85	99.07
	2880	52.72	85.88	99.09
	2879	52.74	84.73	99.1
	2878	52.75	83.45	99.11
	2877	52.75	82.13	99.12
	2876	52.76	80.86	99.13
	2875	52.77	79.76	99.13
	2874	52.79	78.93	99.12
	2873	52.8	78.44	99.12
	2872	52.81	78.33	99.11
	2871	52.83	78.59	99.11
	2870	52.85	79.17	99.1
	2869	52.86	79.98	99.1
	2868	52.88	80.96	99.11
	2867	52.9	82	99.11
	2866	52.91	83.05	99.12
	2865	52.92	84.04	99.13
	2864	52.93	84.94	99.14
	2863	52.93	85.74	99.16
	2862	52.94	86.43	99.17
	2861	52.95	86.99	99.19
	2860	52.95	87.42	99.21
	2859	52.96	87.72	99.23
	2858	52.97	87.88	99.25
	2857	52.98	87.92	99.27
	2856	52.99	87.85	99.29
	2855	53	87.69	99.31
	2854	53.01	87.49	99.32
	2853	53.03	87.3	99.34
	2852	53.04	87.16	99.36
	2851	53.06	87.12	99.37
	2850	53.07	87.21	99.38
	2849	53.09	87.44	99.39
	2848	53.1	87.8	99.39
	2847	53.12	88.26	99.39
	2846	53.14	88.79	99.39
	2845	53.16	89.35	99.39
	2844	53.17	89.9	99.39
	2843	53.19	90.41	99.39
	2842	53.2	90.87	99.39
	2841	53.21	91.25	99.4
	2840	53.23	91.57	99.41
	2839	53.24	91.82	99.41
	2838	53.25	92.01	99.42
	2837	53.26	92.16	99.44
	2836	53.28	92.26	99.45
	2835	53.3	92.33	99.46
	2834	53.31	92.37	99.47
	2833	53.33	92.39	99.48
	2832	53.34	92.39	99.49
	2831	53.36	92.37	99.5
	2830	53.37	92.34	99.51
	2829	53.38	92.29	99.52
	2828	53.4	92.23	99.52
	2827	53.41	92.17	99.53
	2826	53.42	92.11	99.53
	2825	53.43	92.07	99.54
	2824	53.43	92.04	99.55
	2823	53.44	92.06	99.55
	2822	53.45	92.11	99.56
	2821	53.46	92.21	99.57
	2820	53.47	92.37	99.58
	2819	53.48	92.57	99.59
	2818	53.49	92.81	99.6
	2817	53.5	93.08	99.61
	2816	53.51	93.37	99.62
	2815	53.51	93.67	99.62
	2814	53.52	93.97	99.63
	2813	53.53	94.27	99.64
	2812	53.53	94.55	99.65
	2811	53.54	94.81	99.66
	2810	53.55	95.05	99.67
	2809	53.56	95.27	99.68
	2808	53.57	95.47	99.69
	2807	53.58	95.66	99.7
	2806	53.59	95.83	99.71
	2805	53.6	95.98	99.72
	2804	53.6	96.11	99.73
	2803	53.61	96.23	99.73
	2802	53.62	96.34	99.74
	2801	53.63	96.44	99.75
	2800	53.63	96.53	99.75
	2799	53.64	96.61	99.76
	2798	53.64	96.67	99.77
	2797	53.65	96.73	99.77
	2796	53.66	96.79	99.78
	2795	53.67	96.83	99.78
	2794	53.67	96.87	99.78
	2793	53.68	96.91	99.79
	2792	53.69	96.95	99.79
	2791	53.69	96.98	99.79
	2790	53.7	97.02	99.8
	2789	53.71	97.06	99.8
	2788	53.72	97.1	99.81
	2787	53.73	97.15	99.81
	2786	53.74	97.19	99.81
	2785	53.75	97.24	99.82
	2784	53.76	97.29	99.82
	2783	53.77	97.34	99.83
	2782	53.77	97.38	99.83
	2781	53.78	97.43	99.84
	2780	53.78	97.47	99.84
	2779	53.79	97.52	99.85
	2778	53.79	97.56	99.85
	2777	53.79	97.6	99.86
	2776	53.8	97.63	99.86
	2775	53.8	97.67	99.87
	2774	53.81	97.7	99.87
	2773	53.82	97.72	99.88
	2772	53.82	97.75	99.88
	2771	53.83	97.78	99.89
	2770	53.84	97.8	99.89
	2769	53.85	97.83	99.9
	2768	53.85	97.85	99.91
	2767	53.86	97.88	99.91
	2766	53.86	97.9	99.92
	2765	53.87	97.93	99.92
	2764	53.87	97.95	99.92
	2763	53.88	97.98	99.93
	2762	53.88	98	99.93
	2761	53.89	98.03	99.93
	2760	53.89	98.05	99.93
	2759	53.89	98.07	99.93
	2758	53.9	98.08	99.94
	2757	53.9	98.09	99.94
	2756	53.9	98.08	99.94
	2755	53.91	98.07	99.95
	2754	53.91	98.05	99.95
	2753	53.91	98.01	99.96
	2752	53.91	97.95	99.97
	2751	53.91	97.87	99.97
	2750	53.92	97.77	99.98
	2749	53.92	97.65	99.98
	2748	53.92	97.52	99.98
	2747	53.93	97.38	99.99
	2746	53.93	97.24	99.99
	2745	53.93	97.12	99.99
	2744	53.94	97.03	100
	2743	53.94	96.97	100
	2742	53.95	96.96	100
	2741	53.95	96.99	100.01
	2740	53.95	97.05	100.01
	2739	53.95	97.14	100.02
	2738	53.95	97.24	100.03
	2737	53.96	97.34	100.03
	2736	53.96	97.44	100.04
	2735	53.96	97.52	100.04
	2734	53.96	97.58	100.05
	2733	53.96	97.63	100.05
	2732	53.97	97.66	100.05
	2731	53.96	97.68	100.05
	2730	53.96	97.69	100.06
	2729	53.96	97.69	100.06
	2728	53.96	97.7	100.06
	2727	53.96	97.71	100.06
	2726	53.96	97.73	100.07
	2725	53.96	97.75	100.07
	2724	53.96	97.79	100.07
	2723	53.96	97.84	100.07
	2722	53.96	97.9	100.07
	2721	53.96	97.96	100.07
	2720	53.97	98.04	100.07
	2719	53.97	98.12	100.07
	2718	53.97	98.2	100.08
	2717	53.97	98.28	100.08
	2716	53.97	98.36	100.08
	2715	53.97	98.43	100.09
	2714	53.97	98.5	100.09
	2713	53.97	98.56	100.1
	2712	53.97	98.61	100.1
	2711	53.97	98.66	100.1
	2710	53.97	98.7	100.1
	2709	53.97	98.74	100.11
	2708	53.97	98.78	100.11
	2707	53.98	98.81	100.11
	2706	53.98	98.84	100.11
	2705	53.98	98.87	100.12
	2704	53.98	98.89	100.12
	2703	53.99	98.92	100.12
	2702	53.99	98.94	100.13
	2701	53.99	98.96	100.13
	2700	53.99	98.97	100.13
	2699	54	98.99	100.14
	2698	54	99.01	100.14
	2697	54	99.02	100.15
	2696	54.01	99.04	100.15
	2695	54.01	99.05	100.15
	2694	54.01	99.07	100.16
	2693	54.02	99.08	100.16
	2692	54.02	99.09	100.16
	2691	54.02	99.1	100.16
	2690	54.03	99.11	100.16
	2689	54.03	99.11	100.16
	2688	54.03	99.12	100.17
	2687	54.03	99.12	100.17
	2686	54.03	99.12	100.17
	2685	54.03	99.12	100.18
	2684	54.03	99.11	100.18
	2683	54.03	99.11	100.18
	2682	54.03	99.1	100.18
	2681	54.03	99.09	100.19
	2680	54.02	99.09	100.19
	2679	54.02	99.09	100.19
	2678	54.02	99.09	100.19
	2677	54.02	99.1	100.19
	2676	54.02	99.12	100.19
	2675	54.03	99.14	100.19
	2674	54.03	99.16	100.19
	2673	54.03	99.19	100.19
	2672	54.03	99.22	100.19
	2671	54.03	99.24	100.19
	2670	54.03	99.27	100.19
	2669	54.03	99.3	100.19
	2668	54.03	99.32	100.19
	2667	54.03	99.35	100.18
	2666	54.03	99.37	100.17
	2665	54.04	99.38	100.16
	2664	54.04	99.4	100.15
	2663	54.04	99.41	100.14
	2662	54.03	99.43	100.13
	2661	54.03	99.44	100.12
	2660	54.03	99.45	100.11
	2659	54.03	99.46	100.1
	2658	54.03	99.48	100.09
	2657	54.03	99.49	100.09
	2656	54.03	99.5	100.08
	2655	54.03	99.51	100.08
	2654	54.03	99.52	100.07
	2653	54.03	99.53	100.07
	2652	54.03	99.54	100.07
	2651	54.03	99.54	100.07
	2650	54.03	99.55	100.07
	2649	54.03	99.55	100.07
	2648	54.03	99.55	100.07
	2647	54.03	99.55	100.07
	2646	54.03	99.56	100.07
	2645	54.03	99.56	100.07
	2644	54.03	99.56	100.07
	2643	54.03	99.56	100.07
	2642	54.03	99.57	100.07
	2641	54.03	99.57	100.07
	2640	54.03	99.57	100.06
	2639	54.03	99.56	100.06
	2638	54.03	99.56	100.07
	2637	54.03	99.56	100.07
	2636	54.03	99.55	100.07
	2635	54.03	99.55	100.07
	2634	54.03	99.54	100.08
	2633	54.03	99.53	100.08
	2632	54.03	99.52	100.09
	2631	54.03	99.51	100.09
	2630	54.03	99.5	100.09
	2629	54.03	99.49	100.09
	2628	54.03	99.48	100.09
	2627	54.03	99.47	100.09
	2626	54.03	99.46	100.09
	2625	54.03	99.45	100.09
	2624	54.03	99.45	100.09
	2623	54.03	99.45	100.09
	2622	54.03	99.45	100.1
	2621	54.03	99.45	100.1
	2620	54.03	99.46	100.1
	2619	54.03	99.46	100.11
	2618	54.03	99.46	100.11
	2617	54.03	99.47	100.12
	2616	54.03	99.47	100.12
	2615	54.03	99.47	100.13
	2614	54.03	99.47	100.13
	2613	54.03	99.47	100.13
	2612	54.03	99.47	100.13
	2611	54.03	99.47	100.13
	2610	54.03	99.46	100.14
	2609	54.03	99.45	100.14
	2608	54.03	99.44	100.14
	2607	54.03	99.43	100.15
	2606	54.03	99.41	100.15
	2605	54.03	99.39	100.15
	2604	54.03	99.36	100.16
	2603	54.03	99.33	100.16
	2602	54.03	99.29	100.16
	2601	54.03	99.25	100.16
	2600	54.03	99.21	100.16
	2599	54.03	99.16	100.16
	2598	54.03	99.12	100.16
	2597	54.03	99.08	100.16
	2596	54.03	99.05	100.17
	2595	54.03	99.02	100.17
	2594	54.03	99.02	100.17
	2593	54.03	99.02	100.18
	2592	54.03	99.03	100.19
	2591	54.03	99.05	100.19
	2590	54.03	99.08	100.2
	2589	54.03	99.11	100.2
	2588	54.03	99.15	100.2
	2587	54.03	99.18	100.21
	2586	54.03	99.21	100.21
	2585	54.03	99.23	100.21
	2584	54.03	99.26	100.21
	2583	54.03	99.28	100.21
	2582	54.03	99.29	100.22
	2581	54.03	99.3	100.22
	2580	54.03	99.31	100.22
	2579	54.03	99.32	100.22
	2578	54.03	99.33	100.23
	2577	54.03	99.33	100.23
	2576	54.03	99.34	100.23
	2575	54.03	99.34	100.24
	2574	54.03	99.34	100.24
	2573	54.03	99.35	100.24
	2572	54.03	99.35	100.24
	2571	54.03	99.35	100.24
	2570	54.03	99.35	100.24
	2569	54.03	99.35	100.24
	2568	54.03	99.35	100.24
	2567	54.03	99.36	100.24
	2566	54.03	99.37	100.23
	2565	54.03	99.37	100.23
	2564	54.03	99.38	100.23
	2563	54.03	99.39	100.23
	2562	54.03	99.41	100.24
	2561	54.03	99.41	100.24
	2560	54.03	99.42	100.24
	2559	54.03	99.43	100.25
	2558	54.03	99.43	100.25
	2557	54.03	99.43	100.25
	2556	54.03	99.42	100.25
	2555	54.03	99.41	100.26
	2554	54.03	99.4	100.26
	2553	54.03	99.39	100.26
	2552	54.03	99.37	100.27
	2551	54.03	99.36	100.27
	2550	54.03	99.36	100.27
	2549	54.03	99.35	100.27
	2548	54.03	99.34	100.27
	2547	54.03	99.34	100.27
	2546	54.03	99.33	100.27
	2545	54.03	99.33	100.27
	2544	54.03	99.32	100.26
	2543	54.03	99.32	100.26
	2542	54.03	99.32	100.26
	2541	54.03	99.31	100.26
	2540	54.03	99.31	100.27
	2539	54.03	99.31	100.27
	2538	54.03	99.3	100.27
	2537	54.03	99.29	100.27
	2536	54.03	99.28	100.27
	2535	54.03	99.26	100.27
	2534	54.03	99.24	100.27
	2533	54.03	99.23	100.26
	2532	54.03	99.22	100.26
	2531	54.03	99.22	100.26
	2530	54.03	99.23	100.26
	2529	54.03	99.26	100.26
	2528	54.03	99.3	100.26
	2527	54.03	99.34	100.27
	2526	54.03	99.4	100.27
	2525	54.03	99.46	100.27
	2524	54.03	99.52	100.28
	2523	54.03	99.58	100.28
	2522	54.03	99.63	100.28
	2521	54.03	99.67	100.28
	2520	54.03	99.71	100.28
	2519	54.03	99.74	100.28
	2518	54.03	99.77	100.28
	2517	54.03	99.79	100.27
	2516	54.03	99.8	100.27
	2515	54.03	99.81	100.27
	2514	54.03	99.82	100.27
	2513	54.03	99.83	100.27
	2512	54.03	99.83	100.27
	2511	54.03	99.83	100.27
	2510	54.03	99.84	100.27
	2509	54.03	99.85	100.27
	2508	54.03	99.86	100.27
	2507	54.03	99.87	100.27
	2506	54.03	99.88	100.27
	2505	54.03	99.9	100.27
	2504	54.03	99.91	100.27
	2503	54.03	99.92	100.27
	2502	54.03	99.93	100.27
	2501	54.03	99.95	100.27
	2500	54.03	99.96	100.28
	2499	54.03	99.97	100.28
	2498	54.03	99.98	100.28
	2497	54.03	99.99	100.28
	2496	54.03	99.99	100.28
	2495	54.03	99.99	100.27
	2494	54.03	99.99	100.27
	2493	54.03	99.99	100.27
	2492	54.03	99.98	100.26
	2491	54.03	99.98	100.26
	2490	54.03	99.97	100.27
	2489	54.03	99.97	100.27
	2488	54.03	99.96	100.27
	2487	54.03	99.96	100.27
	2486	54.03	99.96	100.27
	2485	54.03	99.96	100.27
	2484	54.03	99.96	100.27
	2483	54.03	99.96	100.27
	2482	54.03	99.96	100.27
	2481	54.03	99.97	100.27
	2480	54.03	99.97	100.27
	2479	54.03	99.97	100.27
	2478	54.03	99.98	100.27
	2477	54.03	99.98	100.28
	2476	54.03	99.98	100.28
	2475	54.03	99.98	100.28
	2474	54.03	99.99	100.28
	2473	54.03	99.99	100.28
	2472	54.03	99.99	100.28
	2471	54.03	99.99	100.27
	2470	54.03	99.98	100.27
	2469	54.03	99.98	100.26
	2468	54.03	99.98	100.26
	2467	54.03	99.97	100.25
	2466	54.03	99.96	100.25
	2465	54.03	99.95	100.24
	2464	54.03	99.94	100.23
	2463	54.03	99.93	100.23
	2462	54.03	99.92	100.22
	2461	54.03	99.91	100.22
	2460	54.03	99.9	100.22
	2459	54.03	99.89	100.21
	2458	54.03	99.89	100.21
	2457	54.03	99.88	100.21
	2456	54.03	99.88	100.21
	2455	54.03	99.89	100.21
	2454	54.03	99.89	100.21
	2453	54.03	99.9	100.22
	2452	54.03	99.91	100.22
	2451	54.03	99.92	100.23
	2450	54.03	99.93	100.23
	2449	54.03	99.94	100.23
	2448	54.03	99.95	100.23
	2447	54.03	99.95	100.23
	2446	54.03	99.95	100.23
	2445	54.03	99.95	100.23
	2444	54.03	99.94	100.23
	2443	54.03	99.93	100.23
	2442	54.03	99.92	100.23
	2441	54.03	99.9	100.23
	2440	54.03	99.88	100.23
	2439	54.03	99.86	100.23
	2438	54.03	99.84	100.23
	2437	54.03	99.81	100.23
	2436	54.03	99.79	100.23
	2435	54.03	99.77	100.24
	2434	54.03	99.76	100.24
	2433	54.03	99.74	100.24
	2432	54.03	99.74	100.25
	2431	54.03	99.73	100.25
	2430	54.03	99.74	100.25
	2429	54.03	99.74	100.25
	2428	54.03	99.75	100.26
	2427	54.03	99.77	100.26
	2426	54.03	99.78	100.26
	2425	54.03	99.81	100.26
	2424	54.03	99.83	100.26
	2423	54.03	99.85	100.25
	2422	54.03	99.87	100.25
	2421	54.03	99.89	100.25
	2420	54.03	99.9	100.25
	2419	54.03	99.91	100.25
	2418	54.03	99.91	100.25
	2417	54.03	99.91	100.25
	2416	54.03	99.91	100.25
	2415	54.03	99.9	100.25
	2414	54.03	99.89	100.25
	2413	54.03	99.89	100.25
	2412	54.03	99.88	100.25
	2411	54.03	99.89	100.25
	2410	54.03	99.9	100.25
	2409	54.03	99.91	100.25
	2408	54.03	99.94	100.26
	2407	54.03	99.97	100.26
	2406	54.03	100	100.27
	2405	54.03	100.03	100.27
	2404	54.03	100.05	100.28
	2403	54.04	100.08	100.28
	2402	54.04	100.1	100.28
	2401	54.04	100.11	100.28
	2400	54.04	100.12	100.28
	2399	54.04	100.13	100.29
	2398	54.04	100.14	100.29
	2397	54.04	100.15	100.29
	2396	54.04	100.16	100.29
	2395	54.05	100.17	100.29
	2394	54.05	100.18	100.29
	2393	54.05	100.18	100.29
	2392	54.05	100.19	100.29
	2391	54.06	100.19	100.29
	2390	54.06	100.19	100.29
	2389	54.07	100.19	100.28
	2388	54.07	100.19	100.28
	2387	54.08	100.19	100.28
	2386	54.09	100.19	100.28
	2385	54.1	100.2	100.28
	2384	54.11	100.2	100.28
	2383	54.12	100.2	100.28
	2382	54.13	100.21	100.28
	2381	54.14	100.21	100.28
	2380	54.14	100.22	100.28
	2379	54.15	100.22	100.29
	2378	54.15	100.22	100.29
	2377	54.15	100.23	100.3
	2376	54.14	100.23	100.31
	2375	54.14	100.23	100.31
	2374	54.14	100.24	100.32
	2373	54.14	100.24	100.32
	2372	54.14	100.24	100.32
	2371	54.14	100.24	100.32
	2370	54.15	100.24	100.31
	2369	54.15	100.24	100.31
	2368	54.16	100.24	100.3
	2367	54.16	100.24	100.3
	2366	54.17	100.24	100.29
	2365	54.17	100.24	100.29
	2364	54.16	100.24	100.28
	2363	54.16	100.24	100.28
	2362	54.15	100.24	100.27
	2361	54.14	100.24	100.27
	2360	54.12	100.24	100.27
	2359	54.11	100.24	100.26
	2358	54.1	100.25	100.26
	2357	54.09	100.26	100.27
	2356	54.08	100.27	100.27
	2355	54.09	100.29	100.27
	2354	54.09	100.3	100.27
	2353	54.11	100.31	100.27
	2352	54.12	100.31	100.26
	2351	54.14	100.3	100.25
	2350	54.16	100.27	100.24
	2349	54.17	100.24	100.22
	2348	54.18	100.2	100.2
	2347	54.19	100.16	100.18
	2346	54.2	100.14	100.17
	2345	54.2	100.12	100.15
	2344	54.2	100.12	100.14
	2343	54.2	100.12	100.13
	2342	54.19	100.13	100.12
	2341	54.18	100.15	100.12
	2340	54.17	100.16	100.11
	2339	54.16	100.18	100.11
	2338	54.15	100.18	100.11
	2337	54.15	100.19	100.11
	2336	54.15	100.19	100.11
	2335	54.14	100.2	100.11
	2334	54.14	100.2	100.11
	2333	54.14	100.2	100.1
	2332	54.14	100.2	100.09
	2331	54.14	100.19	100.08
	2330	54.13	100.18	100.05
	2329	54.13	100.16	100.01
	2328	54.12	100.13	99.97
	2327	54.12	100.11	99.93
	2326	54.11	100.08	99.88
	2325	54.11	100.07	99.85
	2324	54.11	100.06	99.82
	2323	54.11	100.07	99.8
	2322	54.11	100.08	99.8
	2321	54.1	100.11	99.81
	2320	54.1	100.14	99.83
	2319	54.1	100.17	99.85
	2318	54.11	100.2	99.87
	2317	54.11	100.23	99.89
	2316	54.12	100.25	99.91
	2315	54.12	100.27	99.93
	2314	54.13	100.28	99.94
	2313	54.14	100.28	99.94
	2312	54.15	100.29	99.94
	2311	54.15	100.29	99.94
	2310	54.16	100.29	99.94
	2309	54.16	100.28	99.93
	2308	54.16	100.28	99.93
	2307	54.16	100.27	99.92
	2306	54.16	100.25	99.91
	2305	54.17	100.24	99.91
	2304	54.17	100.22	99.9
	2303	54.17	100.2	99.89
	2302	54.17	100.18	99.89
	2301	54.18	100.16	99.88
	2300	54.18	100.13	99.87
	2299	54.18	100.11	99.86
	2298	54.18	100.08	99.85
	2297	54.18	100.06	99.84
	2296	54.18	100.04	99.83
	2295	54.18	100.02	99.81
	2294	54.18	100	99.8
	2293	54.18	99.98	99.78
	2292	54.18	99.97	99.76
	2291	54.18	99.95	99.75
	2290	54.18	99.94	99.73
	2289	54.18	99.92	99.72
	2288	54.18	99.9	99.71
	2287	54.18	99.89	99.7
	2286	54.19	99.88	99.7
	2285	54.19	99.87	99.7
	2284	54.19	99.86	99.71
	2283	54.19	99.86	99.71
	2282	54.19	99.86	99.72
	2281	54.19	99.86	99.73
	2280	54.19	99.87	99.74
	2279	54.19	99.88	99.75
	2278	54.19	99.89	99.77
	2277	54.19	99.91	99.78
	2276	54.19	99.93	99.78
	2275	54.19	99.96	99.79
	2274	54.19	99.99	99.8
	2273	54.19	100.02	99.8
	2272	54.19	100.05	99.81
	2271	54.19	100.08	99.81
	2270	54.19	100.1	99.82
	2269	54.18	100.13	99.83
	2268	54.18	100.15	99.83
	2267	54.18	100.17	99.84
	2266	54.18	100.19	99.84
	2265	54.18	100.21	99.85
	2264	54.18	100.22	99.85
	2263	54.17	100.24	99.85
	2262	54.17	100.25	99.84
	2261	54.17	100.26	99.84
	2260	54.17	100.28	99.83
	2259	54.17	100.29	99.83
	2258	54.16	100.31	99.83
	2257	54.16	100.32	99.83
	2256	54.16	100.34	99.84
	2255	54.16	100.36	99.85
	2254	54.15	100.37	99.85
	2253	54.15	100.38	99.86
	2252	54.15	100.39	99.86
	2251	54.14	100.39	99.86
	2250	54.14	100.39	99.85
	2249	54.14	100.39	99.85
	2248	54.13	100.38	99.84
	2247	54.13	100.37	99.83
	2246	54.12	100.36	99.82
	2245	54.12	100.35	99.82
	2244	54.11	100.34	99.82
	2243	54.11	100.33	99.81
	2242	54.1	100.33	99.81
	2241	54.1	100.32	99.81
	2240	54.09	100.32	99.8
	2239	54.08	100.32	99.8
	2238	54.08	100.32	99.8
	2237	54.07	100.32	99.8
	2236	54.07	100.33	99.8
	2235	54.06	100.33	99.8
	2234	54.06	100.33	99.8
	2233	54.05	100.33	99.8
	2232	54.05	100.33	99.8
	2231	54.04	100.33	99.8
	2230	54.04	100.34	99.8
	2229	54.03	100.34	99.79
	2228	54.03	100.34	99.79
	2227	54.03	100.34	99.78
	2226	54.03	100.34	99.78
	2225	54.03	100.34	99.77
	2224	54.03	100.34	99.76
	2223	54.03	100.33	99.76
	2222	54.03	100.33	99.75
	2221	54.03	100.33	99.75
	2220	54.03	100.33	99.75
	2219	54.03	100.33	99.75
	2218	54.03	100.32	99.76
	2217	54.03	100.32	99.76
	2216	54.03	100.31	99.77
	2215	54.03	100.31	99.77
	2214	54.03	100.3	99.77
	2213	54.03	100.3	99.76
	2212	54.03	100.3	99.76
	2211	54.03	100.3	99.75
	2210	54.03	100.3	99.75
	2209	54.03	100.3	99.75
	2208	54.03	100.3	99.75
	2207	54.03	100.29	99.75
	2206	54.03	100.28	99.75
	2205	54.03	100.26	99.75
	2204	54.03	100.24	99.75
	2203	54.04	100.23	99.74
	2202	54.04	100.21	99.73
	2201	54.04	100.2	99.72
	2200	54.04	100.19	99.7
	2199	54.04	100.18	99.69
	2198	54.04	100.17	99.69
	2197	54.03	100.16	99.69
	2196	54.03	100.16	99.69
	2195	54.03	100.15	99.69
	2194	54.03	100.14	99.69
	2193	54.04	100.14	99.69
	2192	54.04	100.14	99.68
	2191	54.04	100.14	99.68
	2190	54.04	100.14	99.66
	2189	54.04	100.14	99.65
	2188	54.04	100.14	99.64
	2187	54.03	100.15	99.64
	2186	54.03	100.16	99.64
	2185	54.03	100.17	99.65
	2184	54.03	100.17	99.66
	2183	54.03	100.18	99.68
	2182	54.03	100.18	99.71
	2181	54.03	100.18	99.73
	2180	54.03	100.18	99.75
	2179	54.03	100.18	99.76
	2178	54.03	100.19	99.77
	2177	54.03	100.19	99.78
	2176	54.03	100.19	99.78
	2175	54.03	100.2	99.77
	2174	54.03	100.2	99.75
	2173	54.02	100.2	99.72
	2172	54.02	100.18	99.68
	2171	54.02	100.16	99.63
	2170	54.02	100.13	99.58
	2169	54.01	100.1	99.53
	2168	54.01	100.06	99.47
	2167	54.01	100.02	99.43
	2166	54.01	99.99	99.4
	2165	54.01	99.97	99.39
	2164	54.01	99.98	99.41
	2163	54	100.03	99.46
	2162	54	100.1	99.55
	2161	54	100.2	99.67
	2160	53.99	100.32	99.81
	2159	53.99	100.45	99.95
	2158	53.99	100.56	100.08
	2157	53.99	100.65	100.18
	2156	53.98	100.7	100.25
	2155	53.98	100.72	100.28
	2154	53.98	100.72	100.28
	2153	53.98	100.68	100.26
	2152	53.97	100.64	100.23
	2151	53.97	100.6	100.19
	2150	53.97	100.56	100.16
	2149	53.97	100.53	100.14
	2148	53.97	100.51	100.12
	2147	53.96	100.5	100.11
	2146	53.96	100.5	100.1
	2145	53.96	100.49	100.09
	2144	53.96	100.48	100.08
	2143	53.96	100.48	100.07
	2142	53.96	100.47	100.06
	2141	53.96	100.46	100.06
	2140	53.96	100.46	100.05
	2139	53.96	100.45	100.05
	2138	53.96	100.45	100.06
	2137	53.97	100.46	100.06
	2136	53.97	100.46	100.07
	2135	53.97	100.46	100.07
	2134	53.97	100.46	100.06
	2133	53.97	100.45	100.05
	2132	53.98	100.44	100.03
	2131	53.98	100.43	100.01
	2130	53.98	100.42	99.97
	2129	53.98	100.4	99.94
	2128	53.99	100.38	99.9
	2127	53.99	100.35	99.87
	2126	53.99	100.33	99.83
	2125	53.99	100.3	99.8
	2124	54	100.27	99.78
	2123	54	100.24	99.75
	2122	54	100.2	99.72
	2121	54	100.17	99.69
	2120	54.01	100.14	99.66
	2119	54.01	100.11	99.64
	2118	54.01	100.08	99.61
	2117	54.01	100.06	99.58
	2116	54.01	100.04	99.55
	2115	54.02	100.03	99.53
	2114	54.02	100.02	99.51
	2113	54.02	100.01	99.5
	2112	54.02	100.01	99.49
	2111	54.02	100.01	99.49
	2110	54.03	100.01	99.49
	2109	54.03	100.01	99.5
	2108	54.03	100.01	99.5
	2107	54.03	100.01	99.51
	2106	54.03	100.01	99.51
	2105	54.03	100.01	99.52
	2104	54.03	100.01	99.52
	2103	54.03	100.02	99.52
	2102	54.03	100.02	99.52
	2101	54.03	100.04	99.52
	2100	54.03	100.05	99.53
	2099	54.03	100.07	99.54
	2098	54.03	100.1	99.56
	2097	54.03	100.12	99.58
	2096	54.03	100.15	99.6
	2095	54.03	100.18	99.62
	2094	54.03	100.19	99.63
	2093	54.03	100.2	99.64
	2092	54.03	100.21	99.63
	2091	54.02	100.21	99.62
	2090	54.02	100.2	99.61
	2089	54.02	100.2	99.59
	2088	54.02	100.19	99.57
	2087	54.02	100.19	99.55
	2086	54.01	100.19	99.53
	2085	54.01	100.19	99.51
	2084	54.01	100.19	99.5
	2083	54.01	100.2	99.49
	2082	54	100.2	99.48
	2081	54	100.2	99.47
	2080	53.99	100.2	99.47
	2079	53.99	100.2	99.47
	2078	53.99	100.2	99.47
	2077	53.98	100.21	99.47
	2076	53.98	100.22	99.47
	2075	53.97	100.23	99.48
	2074	53.97	100.24	99.48
	2073	53.96	100.25	99.49
	2072	53.96	100.26	99.5
	2071	53.95	100.27	99.51
	2070	53.95	100.27	99.53
	2069	53.94	100.27	99.54
	2068	53.94	100.26	99.55
	2067	53.93	100.26	99.56
	2066	53.93	100.26	99.56
	2065	53.92	100.26	99.57
	2064	53.92	100.26	99.57
	2063	53.91	100.27	99.57
	2062	53.91	100.27	99.57
	2061	53.9	100.28	99.58
	2060	53.9	100.29	99.57
	2059	53.9	100.3	99.57
	2058	53.89	100.29	99.56
	2057	53.89	100.29	99.55
	2056	53.88	100.27	99.53
	2055	53.88	100.25	99.51
	2054	53.87	100.23	99.49
	2053	53.87	100.21	99.48
	2052	53.86	100.2	99.46
	2051	53.86	100.2	99.46
	2050	53.85	100.21	99.46
	2049	53.85	100.23	99.48
	2048	53.84	100.26	99.5
	2047	53.83	100.28	99.53
	2046	53.83	100.3	99.56
	2045	53.82	100.31	99.58
	2044	53.81	100.32	99.6
	2043	53.81	100.32	99.62
	2042	53.8	100.32	99.64
	2041	53.8	100.32	99.65
	2040	53.79	100.32	99.67
	2039	53.79	100.32	99.69
	2038	53.78	100.33	99.72
	2037	53.78	100.35	99.74
	2036	53.78	100.37	99.77
	2035	53.77	100.39	99.79
	2034	53.77	100.4	99.82
	2033	53.77	100.42	99.84
	2032	53.76	100.44	99.87
	2031	53.76	100.45	99.89
	2030	53.75	100.46	99.91
	2029	53.75	100.48	99.93
	2028	53.74	100.5	99.95
	2027	53.74	100.52	99.96
	2026	53.73	100.54	99.97
	2025	53.72	100.56	99.98
	2024	53.72	100.58	99.99
	2023	53.71	100.6	100
	2022	53.7	100.61	100
	2021	53.69	100.62	100
	2020	53.68	100.63	100
	2019	53.68	100.63	100
	2018	53.67	100.62	99.99
	2017	53.66	100.61	99.99
	2016	53.66	100.6	99.99
	2015	53.65	100.59	99.99
	2014	53.64	100.58	99.99
	2013	53.64	100.58	99.99
	2012	53.63	100.58	99.99
	2011	53.62	100.59	100
	2010	53.61	100.61	100.01
	2009	53.61	100.63	100.03
	2008	53.6	100.65	100.04
	2007	53.59	100.67	100.06
	2006	53.58	100.68	100.07
	2005	53.57	100.68	100.07
	2004	53.56	100.68	100.08
	2003	53.55	100.67	100.07
[truncated: 1,553 more rows]

## Sheet: Release Kinetics
Time		Release (%)			Release (%)			Release (%)			Release (%)			Release (%)
Hour	HNT-[Bmim][Cl]			HNT-[Bmim][Cl](PEI)			HNT-[Bmim][Cl](PEI,PAA)			HNT-[Bmim][Cl](PDA)			HNT-[Bmim][Cl](PDA,PAA)
	Neutral	pH 4	pH 10	Neutral	pH 4	pH 10	Neutral	pH 4	pH 10	Neutral	pH 4	pH 10	Neutral	pH 4	pH 10
0.08333				6.68129	2.75544	7.95499	0	2.77918	7.16737	6.37975	5.26939	5.36709	0	5.70464	2.93147
0.16667	54.1655	54.2388	55.0939	6.82757	3.93481	9.64276	0	3.11674	8.18003	6.49226	7.83501	5.70464	0	6.15471	3.09155
0.25				7.25738	4.57811	11.218	0	3.79184	8.85513	7.72996	8.82179	7.39241	0	7.27989	3.27164
0.33333	54.525	55.8033	55.3994	7.46667	5.32862	12.2307	0	5.36709	10.0928	8.74262	9.2165	7.72996	0	7.27989	3.27831
0.41667				7.83572	5.86469	12.3432	0	4.35443	10.5429	9.08017	9.41385	8.29255	0	7.05485	3.45173
0.5	54.8845	55.9988	55.7049	8.26554	6.40077	13.3558	0	4.35443	11.1055	8.6301	9.41385	8.51758	0	7.27989	3.54511
0.58333				8.55809	6.72242	12.9058	0	5.36709	11.1055	8.96765	9.41385	8.74262	0	7.05485	3.76188
0.66667	55.4237	56.1944	56.0104	10.7364	6.93685	13.2433	0	5.70464	11.218	10.5429	9.41385	9.75527	0	7.50492	3.76855
0.75				12.7797	7.58014	14.1435	0.416315	5.47961	11.218	10.5429	9.80857	11.218	0.0787623	7.39241	3.93197
0.83333	56.8617	56.7811	56.6213	13.6934	8.00901	14.3685	0.416315	5.59212	11.5556	10.7679	10.0059	11.3305	0.0787623	7.16737	3.94864
0.91667				14.3707	8.00901	14.481	0.528833	5.81716	12.6807	10.3179	10.0059	13.8059	0.19128	7.05485	4.10872
1	57.0414	57.1722	56.9268	14.5148	8.75952	14.256	0.64135	6.04219	13.0183	10.4304	10.2033	13.9184	0.19128	6.82982	4.27547
2	57.2212	57.5633	57.5378	14.706	11.976	13.6934	1.20394	10.6554	14.8186	14.1435	10.4006	15.2686	0.19128	7.39241	4.74571
3	57.5807	57.7589	58.1488	15.5724	14.5492	13.2433	2.32911	13.6934	18.1941	14.256	10.9927	15.3812	0.0787623	7.50492	5.14591
4	58.4794	58.15	58.1488	16.0788	17.0151	15.0436	3.34177	16.3938	19.6568	14.0309	11.7821	16.6188	0.753868	8.40506	5.65283
5	59.0186	58.15	58.4543	18.4349	20.0172	15.2686	3.45429	18.9817	21.2321	14.3685	12.7689	16.6188	0.978903	10.0928	6.68668
6	59.5578	59.1278	58.4543	20.9575	20.6604	14.8186	3.79184	19.7693	21.5696	15.8312	12.7689	17.519	1.65401	11.7806	7.4704
7	59.7376	60.8879	58.607	23.3857	22.4831	15.1561	4.57947	20.557	22.4698	17.294	13.953	18.1941	1.99156	11.6681	8.35084
8	61.8945	61.279	60.8981	26.4214	23.6625	15.3812	6.49226	22.9198	22.6948	17.744	14.5451	21.7947	2.32911	11.218	8.95448
24	66.2083	73.2082	72.1059	29.7834	46.6066	18.3066	8.96765	29.5584	37.2096	26.0703	20.2684	28.9395	5.02954	13.0183	9.28798
48	76.6334	77.5105	82.8929	39.3474	76.3054	28.7707	10.8805	33.9466	46.8861	34.3966	27.1758	36.0844	10.0928	15.1561	12.623
72	88.137	81.6173	87.4752	38.3347	87.3486	30.346	14.3685	36.4219	50.3741	44.0731	31.9124	42.948	17.0689	17.294	14.9575

## Sheet: Release Kinetics (Fitted)
Time		Release (%)			Release (%)			Release (%)			Release (%)			Release (%)
Hour	HNT-[Bmim][Cl]			HNT-[Bmim][Cl](PEI)			HNT-[Bmim][Cl](PEI,PAA)			HNT-[Bmim][Cl](PDA)			HNT-[Bmim][Cl](PDA,PAA)
	Neutral	pH 4	pH 10	Neutral	pH 4	pH 10	Neutral	pH 4	pH 10	Neutral	pH 4	pH 10	Neutral	pH 4	pH 10
0.08333				8.79332	3.91983	10.1175	0.30837	4.96204	8.97951	7.44306	6.71025	7.4179	0.01295	6.34832	3.39672
0.16667	54.5357	54.9601	55.4021	9.50928	4.57102	10.7006	0.4584	5.70386	9.6925	7.90684	7.20442	8.12956	0.02697	6.57989	3.5815
0.25				10.0359	5.10976	11.112	0.57804	6.24972	10.2334	8.26697	7.56872	8.65542	0.04143	6.75226	3.72195
0.33333	54.7823	55.3385	55.6221	10.468	5.5864	11.4408	0.68143	6.69776	10.686	8.5729	7.86808	9.08817	0.05619	6.89478	3.83965
0.41667				10.8411	6.02162	11.7192	0.77419	7.08474	11.0826	8.84395	8.12687	9.46269	0.07116	7.01854	3.94289
0.5	54.997	55.6462	55.8178	11.1731	6.42644	11.9631	0.85928	7.42913	11.4397	9.0901	8.35733	9.79651	0.08632	7.12916	4.03589
0.58333				11.4743	6.80761	12.1816	0.93848	7.74172	11.7668	9.31731	8.56662	10.0999	0.10162	7.22992	4.12117
0.66667	55.1933	55.9154	55.9993	11.7516	7.16965	12.3805	1.01297	8.02942	12.0704	9.52947	8.75935	10.3794	0.11706	7.32295	4.20034
0.75				12.0095	7.51574	12.5638	1.08356	8.29701	12.3548	9.72928	8.93869	10.6397	0.13261	7.4097	4.27453
0.83333	55.3769	56.1592	56.1708	12.2512	7.84827	12.734	1.15086	8.54792	12.6231	9.91874	9.1069	10.8839	0.14826	7.49124	4.34457
0.91667				12.4793	8.16904	12.8935	1.21534	8.7847	12.8778	10.0993	9.2657	11.1146	0.164	7.56835	4.41107
1	55.551	56.3845	56.3348	12.6958	8.47949	13.0437	1.27735	9.00935	13.1206	10.2723	9.4164	11.3336	0.17983	7.64165	4.47451
2	56.4742	57.51	57.221	14.7346	11.6807	14.4157	1.89884	11.1266	15.4629	11.97	10.8387	13.404	0.37462	8.33852	5.08733
3	57.2777	58.4253	58.0093	16.2342	14.3291	15.3838	2.39444	12.6845	17.2398	13.2883	11.8872	14.9339	0.5755	8.85724	5.55316
4	58.0123	59.2261	58.7401	17.4647	16.6723	16.1575	2.8227	13.9633	18.7268	14.4083	12.7488	16.1929	0.78044	9.28611	5.94352
5	58.6996	59.9512	59.4308	18.5272	18.8118	16.8127	3.20696	15.0678	20.0298	15.4005	13.4936	17.2825	0.98844	9.65855	6.28591
6	59.3513	60.6214	60.0913	19.4726	20.8019	17.3867	3.55944	16.0507	21.2027	16.3016	14.157	18.2537	1.19893	9.99144	6.59436
7	59.9749	61.249	60.7276	20.3306	22.6757	17.9009	3.88751	16.9429	22.2775	17.1334	14.7593	19.1364	1.41149	10.2947	6.87718
8	60.5753	61.8422	61.344	21.1202	24.4554	18.3689	4.19605	17.764	23.2748	17.91	15.314	19.9496	1.62586	10.5746	7.13975
24	68.5636	69.074	69.7779	29.6149	46.6316	23.1579	7.86564	26.6037	34.4198	26.8442	21.2987	28.7492	5.20332	13.6308	10.0815
48	78.1567	76.8562	80.2645	37.3893	71.1697	27.2566	11.6926	34.7001	45.1422	35.77	26.7963	36.863	10.8399	16.4823	12.9211
72	86.5075	83.1842	89.5927	43.1074	91.4705	30.149	14.7444	40.6579	53.2762	42.701	30.8491	42.8585	16.6525	18.6049	15.0797

## Sheet: Fitting Ritger-Peppas Example
Ritger-Peppas Model
Parameters	Initial value	Time（t）	Q(%)Y(t)	Fitted valuesŶ(t)	[Y(t)-Ŷ(t)]^2
α	2.75544	0.0833333	2.75544	3.91983	1.35579
n	0.640862	0.166667	3.93481	4.57102	0.404761
k	5.72404	0.25	4.57811	5.10976	0.282657
		0.333333	5.32862	5.5864	0.0664544
R2	0.995558	0.416667	5.86469	6.02162	0.0246259
		0.5	6.40077	6.42644	0.000658867
		0.583333	6.72242	6.80761	0.00725821
		0.666667	6.93685	7.16965	0.0541955
		0.75	7.58014	7.51574	0.00414741
		0.833333	8.00901	7.84827	0.0258373
		0.916667	8.00901	8.16904	0.0256096
		1	8.75952	8.47949	0.0784164
		2	11.976	11.6807	0.087181
		3	14.5492	14.3291	0.0484102
		4	17.0151	16.6723	0.117539
		5	20.0172	18.8118	1.45293
		6	20.6604	20.8018	0.0199938
		7	22.4831	22.6757	0.0370794
		8	23.6625	24.4554	0.628741
		24	46.6066	46.6316	0.00062177
		48	76.3054	71.1698	26.3744
		72	87.3486	91.4705	16.9901
					4.72291	The first 60% of all release curves were used for statistical analysis.

## Sheet: EIS 1hour
	Z'	-Z''	Z'	-Z''	Z'	-Z''	Z'	-Z''	Z'	-Z''	Z'	-Z''
	ohm	ohm	ohm	ohm	ohm	ohm	ohm	ohm	ohm	ohm	ohm	ohm
	BS	BS	BS (Fitted)	BS (Fitted)	SE	SE	SE (Fitted)	SE (Fitted)	SH	SH	SH (Fitted)	SH (Fitted)
	2.77185	0.21288	2.90474	0.02203	116.493	29.3947	119.729	21.3392	723.113	576.269	739.483	503.526
	2.79281	0.20185	2.90631	0.02634	120.038	31.7252	122.06	24.5574	779.727	639.337	791.579	581.838
	2.80409	0.1923	2.9082	0.03151	121.939	36.2081	124.767	28.2404	842.822	718.256	851.859	672.25
	2.82999	0.18107	2.91045	0.03768	126.733	40.2249	127.911	32.4495	912.599	812.239	921.632	776.628
	2.84317	0.18282	2.91315	0.04507	129.028	42.9356	131.564	37.2507	1000.18	926.94	1002.4	897.094
	2.85781	0.1821	2.91638	0.0539	138.024	43.7311	135.809	42.7151	1100.25	1057.77	1095.91	1036.08
	2.88076	0.18835	2.92024	0.06446	143.478	53.5341	140.745	48.9198	1207.37	1216.53	1204.22	1196.43
	2.90094	0.19347	2.92486	0.07709	149.454	59.538	146.481	55.9417	1339.53	1399.28	1329.65	1381.27
	2.92747	0.13209	2.93039	0.09219	157.212	66.2788	153.148	63.8613	1496.62	1610.1	1474.97	1594.28
	2.94674	0.21753	2.93701	0.11025	165.458	74.2782	160.893	72.7581	1675.3	1850.31	1643.38	1839.64
	2.97057	0.23128	2.94493	0.13185	175.288	83.4388	169.879	82.7034	1884.42	2126.02	1838.58	2122.04
	2.99615	0.25047	2.95441	0.15767	185.359	92.0411	180.293	93.7625	2134.88	2448.06	2064.97	2446.92
	3.02486	0.27568	2.96577	0.18854	196.864	101.81	192.33	105.98	2447.97	2835.46	2327.55	2820.26
	3.04018	0.317	2.97936	0.22545	212.823	111.297	206.201	119.383	2767.92	3233.27	2632.3	3248.95
	3.07089	0.3466	2.99564	0.26958	226.231	125.448	222.115	133.972	3134.97	3687.68	2986.12	3740.62
	3.10391	0.38735	3.01515	0.32232	241.928	140.002	240.27	149.714	3549.35	4192.52	3397.12	4303.78
	3.1413	0.42306	3.03853	0.38538	259.045	154.243	260.835	166.558	4003.91	4767.67	3874.86	4947.94
	3.17636	0.48845	3.06657	0.46073	278.396	172.12	283.919	184.424	4543.54	5442.16	4430.28	5683.19
	3.21514	0.56453	3.10019	0.55075	299.732	190.904	309.562	203.25	5126.74	6206.18	5076.39	6520.69
	3.25366	0.65219	3.14056	0.65831	325.235	215.453	337.713	223.021	5829.31	7141.32	5828.42	7472.41
	3.30713	0.75745	3.18903	0.78677	352.417	237.76	368.216	243.814	6677.45	8071.83	6703.93	8550.56
	3.37795	0.87195	3.2473	0.94017	383.371	262.544	400.849	265.883	7554.88	9252.21	7723.69	9767.95
	3.42953	1.02296	3.31739	1.12325	414.487	293.815	435.339	289.7	8616.98	10616.8	8911.33	11136.6
	3.4962	1.21293	3.40181	1.34172	452.461	325.084	471.474	316.029	9813.13	12128.7	10294.6	12668.2
	3.5669	1.44965	3.5036	1.60226	492.667	363.839	509.173	345.932	11204.4	13883.9	11904.8	14372.3
	3.64391	1.73945	3.62652	1.91281	539.267	402.012	548.609	380.76	12841.8	15894.3	13777.4	16255.1
	3.73657	2.09252	3.77524	2.28277	589.25	447.047	590.305	422.111	14791.5	18187.7	15952.6	18319.1
	3.85686	2.53178	3.95543	2.72299	644.497	496.877	635.187	471.718	17124.6	20739.6	18472.5	20558.8
	4.00729	3.06825	4.17427	3.24629	708.307	555.544	684.662	531.386	19825.9	23568.4	21383	22961.2
	4.20409	3.73296	4.4407	3.86763	771.927	617.391	740.635	602.893	23152.3	26576.8	24730.6	25502.4
	4.46487	4.53101	4.76587	4.60406	847.519	687.789	805.497	687.848	27079.8	29875.2	28558.7	28144.4
	4.80301	5.49003	5.16397	5.47538	922.279	776.054	882.177	787.643	31745.2	33298.1	32906.4	30835.7
	5.27175	6.6551	5.6527	6.5035	1012.01	869.071	974.079	903.234	37082	36617.5	37799.7	33507.7
	5.83393	8.00642	6.2547	7.71319	1115.46	986.432	1085.14	1035.07	43372.1	39884.2	43249.6	36078.9
	6.64736	9.62968	6.99849	9.131	1235.05	1118.36	1219.73	1182.77	50435.6	42545.1	49243	38455.8
	7.59803	11.3987	7.92012	10.7847	1342.09	1268.35	1382.52	1344.93	58226.3	44782.1	55738.8	40540.1
	9.06145	13.5435	9.06512	12.7022	1590.91	1397.42	1578.29	1518.81	66807.3	44970.4	62665	42237.6
	10.6889	15.9314	10.4896	14.9076	1774.03	1601.02	1811.42	1699.95	74976.3	45690.8	69914.5	43467.7
	12.7771	18.5776	12.2627	17.4191	2013.6	1795.68	2085.41	1882.18	82728.8	45375.5	77355.2	44176.5
	15.3719	21.465	14.4676	20.243	2319.48	2032.4	2402.14	2057.6	90143	44361.5	84836	44345.1
	18.4493	24.4252	17.2	23.3651	2685.9	2208.44	2760.98	2216.89	96925.4	42832.7	92196	43996.6
	22.2036	27.5843	20.566	26.744	3068.72	2420.54	3158.31	2350.28	103155	40856.4	99283.2	43197.9
	26.7502	30.453	24.6719	30.2979	3533.37	2578.42	3586.91	2448.56	108347	39147.1	105960	42057.7
	31.522	33.4352	29.6128	33.8993	4034.96	2686.52	4036.62	2504.53	112577	37754.6	112121	40720.3
	37.0506	36.3129	35.4494	37.3695	4613.68	2682.78	4494.9	2514.14	116482	36858.2	117692	39360.1
	43.0427	39.0696	42.1837	40.4865	5126.5	2665.71	4948.45	2477.17	119881	36440	122638	38175.2
	49.7317	41.393	49.7366	43.0068	5655.77	2499.16	5384.83	2397.22	122892	36936.6	126966	37385.3
	56.5269	43.6599	57.9286	44.6999	6113.93	2345.08	5793.56	2281	125759	38449.9	130721	37232.5
	64.0695	45.2377	66.4943	45.3949	6532.81	2053.44	6167.36	2137.11	128840	40230.4	134009	37984.1
	71.6532	46.2212	75.1111	45.0176	6830.13	1763.43	6502.21	1974.76	132036	43875.1	137007	39936.3
	79.2843	46.4482	83.4455	43.6086	7090.66	1515.8	6796.9	1802.73	136026	48473.4	139999	43409.1
	86.9786	45.2889	91.2118	41.3134	7291.91	1232	7052.66	1628.49	140715	53436.4	143438	48721.1
	94.124	44.2949	98.2027	38.3494	7386.99	998.609	7272.13	1458.03	147051	59889.3	148003	56111.9
	101.716	42.6776	104.311	34.96	7511.81	792.913	7458.96	1295.61	155043	67195.8	154664	65587.1
	106.949	39.2449	109.515	31.3769	7602.42	603.767	7617.08	1144.05	164512	75542.3	164619	76646.5
	110.346	35.2315	113.862	27.7929	7597.19	394.12	7750.39	1004.96	176509	83179.5	178992	87980.2
	111.823	30.3639	117.406	24.385	7581.67	277.207	7861.51	880.169	191135	92204	197960	97327.6

## Sheet: EIS 24hour
	Z'	-Z''	Z'	-Z''	Z'	-Z''	Z'	-Z''	Z'	-Z''	Z'	-Z''
	ohm	ohm	ohm	ohm	ohm	ohm	ohm	ohm	ohm	ohm	ohm	ohm
	BS	BS	BS (Fitted)	BS (Fitted)	SE	SE	SE (Fitted)	SE (Fitted)	SH	SH	SH (Fitted)	SH (Fitted)
	2.31204	0.16093	2.44183	0.0333	131.463	33.4926	130.481	31.3383	805.332	548.077	811.421	534.35
	2.31621	0.13173	2.44414	0.0399	135.189	37.141	134.203	35.6195	861.714	631.819	866.994	617.146
	2.33895	0.16174	2.4469	0.04782	138.763	41.2354	138.475	40.4375	935.68	712.635	931.295	712.664
	2.35242	0.16215	2.45022	0.05731	142.878	46.1697	143.374	45.8471	964.313	860.213	1005.72	822.847
	2.36384	0.17152	2.45419	0.06868	148.443	52.7764	148.99	51.9033	1081.35	949.599	1091.87	949.9
	2.37497	0.18101	2.45896	0.0823	154.706	59.2472	155.418	58.6624	1129.47	1169.72	1191.62	1096.35
	2.39258	0.19933	2.46467	0.09864	162.35	66.9511	162.768	66.1814	1319.51	1305.5	1307.17	1265.11
	2.41089	0.21889	2.47152	0.1182	170.933	75.3133	171.153	74.5123	1464.04	1496.98	1441.01	1459.42
	2.4324	0.24404	2.47973	0.14165	180.831	84.3115	180.695	83.7077	1637.16	1722.32	1596.09	1683.03
	2.45698	0.27335	2.48958	0.16975	191.946	94.4731	191.524	93.8181	1829.64	1991.31	1775.86	1940.21
	2.48419	0.30979	2.50139	0.20342	204.56	105.331	203.767	104.889	2046.93	2280.98	1984.3	2235.71
	2.51477	0.35226	2.51555	0.24376	218.684	116.68	217.553	116.971	2327.73	2612.68	2226.13	2574.99
	2.54818	0.40314	2.53254	0.29209	233.422	130.507	233	130.113	2644.67	2996.61	2506.73	2964
	2.58613	0.46063	2.55291	0.35	251.146	143.013	250.222	144.384	2990.22	3399.56	2832.56	3409.54
	2.63081	0.52858	2.57737	0.41937	269.676	158.434	269.319	159.871	3404.46	3874.25	3211.05	3919.04
	2.68	0.60973	2.60672	0.50247	290.035	174.977	290.379	176.694	3840.8	4386.53	3650.92	4500.65
	2.73585	0.70669	2.64196	0.60204	311.941	192.683	313.493	195.032	4325.03	4970.15	4162.49	5163.32
	2.79797	0.81468	2.68428	0.72128	336.301	212.599	338.743	215.113	4884.87	5645.1	4757.53	5916.29
	2.86418	0.9571	2.73513	0.86407	362.219	235.93	366.243	237.253	5521.81	6460.4	5449.96	6769.48
	2.92903	1.11216	2.79626	1.03505	390.586	260.585	396.149	261.854	6245	7365.29	6256.07	7733.1
	3.02185	1.29663	2.86979	1.23973	422.874	290.032	428.67	289.399	7180.88	8381.35	7194.47	8816.91
	3.13664	1.51514	2.95829	1.48474	459.553	322.088	464.112	320.474	8110.77	9493.65	8287	10030.5
	3.25624	1.78639	3.06489	1.77788	498.019	359.908	502.87	355.73	9231.31	10791.1	9558.11	11381.4
	3.37957	2.10478	3.19343	2.12857	542.526	401.424	545.477	395.912	10486.4	12309.5	11036	12875.5
	3.53286	2.49451	3.34859	2.54791	591.109	449.493	592.595	441.815	11975.7	14065.9	12751.9	14515
	3.70961	2.96123	3.53615	3.04911	645.703	503.076	645.037	494.293	13797	15933.3	14739.8	16297
	3.93279	3.52488	3.76324	3.64795	706.856	563.597	703.792	554.25	15825.8	18085.9	17036.4	18212.6
	4.18633	4.20109	4.0386	4.36273	776.811	631.226	769.99	622.59	18282.8	20414.5	19678	20243.3
	4.49813	5.0079	4.37319	5.21524	855.434	706.394	844.977	700.25	21229.6	23054.3	22700.5	22361.3
	4.86492	5.97669	4.78072	6.23113	945.251	791.898	930.306	788.167	24785.3	25692.8	26135.8	24527.3
	5.32426	7.14284	5.2783	7.43995	1045.38	885.695	1027.73	887.211	28764.3	28541.8	30006.5	26688.8
	5.86325	8.53267	5.88766	8.87643	1158.47	988.392	1139.27	998.217	33730.7	30996.3	34324.2	28782.8
	6.53436	10.198	6.63604	10.5798	1284.11	1104.21	1267.16	1121.84	39328.3	33396.2	39080.9	30735.8
	7.3343	12.1928	7.55836	12.595	1424.95	1235.24	1413.94	1258.57	45195.3	35443	44248.5	32470.6
	8.39055	14.5569	8.69884	14.9722	1582.07	1375.48	1582.39	1408.6	51584.4	36776.1	49773	33911.3
	9.48456	17.3589	10.1138	17.7655	1772.44	1525.08	1775.49	1571.71	57874.9	37450.1	55575.2	34992.5
	11.1394	20.7341	11.8754	21.033	1961.07	1719.32	1996.47	1747.19	67011.9	34561.3	61554.3	35667.7
	13.0392	24.7084	14.0736	24.8307	2187.81	1909.39	2248.51	1933.57	73342.3	34497.8	67590.3	35917.5
	16.2397	29.0023	16.8221	29.2105	2521.37	2071.65	2534.78	2128.63	78298.3	33143.7	73558.6	35755.3
	19.3263	34.3177	20.2615	34.212	2821.3	2299.8	2858.22	2329.25	83376.2	31802.6	79338.3	35229
	23.4782	40.5405	24.5605	39.8485	3168.57	2540.52	3221.08	2531.24	87815.7	30763.8	84820.2	34419.3
	28.6329	47.4132	29.9172	46.0956	3575.27	2766.02	3624.89	2729.5	91646.1	29145.8	89919.1	33434.9
	35.2803	55.0122	36.5485	52.8667	4040.8	2989.53	4069.74	2917.91	95187	29119.1	94574.6	32407.1
	43.8681	63.1908	44.6778	59.9967	4540.98	3193.82	4554.33	3089.84	98543.6	28696.8	98757.7	31483.4
	54.5304	71.2944	54.5009	67.2198	5100.81	3350.23	5075.37	3238.35	100731	28784.3	102468	30824.1
	67.4935	78.9391	66.1435	74.164	5688.75	3466.96	5627.59	3356.82	103623	29167.3	105734	30600.4
	82.4002	85.2604	79.6088	80.3677	6328.15	3530.89	6203.91	3439.52	105734	30949.2	108615	30996
	98.9453	89.4279	94.7169	85.3221	6910.92	3514.12	6795.32	3482.19	108498	33112.3	111206	32209.9
	116.573	91.6115	111.09	88.557	7546.21	3481.06	7391.95	3482.59	111299	37097.6	113644	34459.2
	133.143	90.589	128.166	89.7318	8113.15	3361.16	7983.59	3440.69	114611	40960.8	116135	37980.3
	150.59	87.2873	145.265	88.716	8634.7	3239.62	8560.19	3358.72	118006	47371.8	118970	43018.4
	164.252	82.3979	161.712	85.6224	9188.01	3105.41	9113.06	3240.85	122723	53010.9	122574	49803.7
	176.184	76.5488	176.926	80.7795	9613.21	2968.8	9634.83	3092.8	128595	61392.3	127542	58486.2
	188.208	70.3139	190.518	74.6514	10030.9	2828.01	10120.3	2921.14	136542	69627.6	134669	69030.3
	197.031	64.5105	202.296	67.745	10469.7	2687.99	10566.2	2732.76	145139	80213.8	144903	81038.4
	205.458	58.9066	212.25	60.5285	10849.4	2605	10971	2534.32	157353	90173.8	159174	93557.7
	212.033	53.596	220.423	53.4519	11213.4	2496.91	11331.4	2333.9	170708	102079	177801	104884

## Sheet: EIS 72hour
	Z'	-Z''	Z'	-Z''	Z'	-Z''	Z'	-Z''	Z'	-Z''	Z'	-Z''
	ohm	ohm	ohm	ohm	ohm	ohm	ohm	ohm	ohm	ohm	ohm	ohm
	BS	BS	BS (Fitted)	BS (Fitted)	SE	SE	SE (Fitted)	SE (Fitted)	SH	SH	SH (Fitted)	SH (Fitted)
	2.06119	0.14867	2.20006	0.03806	139.999	32.5208	138.108	29.6402	857.846	398.372	834.492	412.405
	2.0712	0.15026	2.20289	0.0454	143.275	35.8388	141.597	33.6934	894.967	455.123	879.307	474.746
	2.08237	0.15551	2.20627	0.05415	147.088	39.389	145.591	38.2652	935.386	522.202	931.298	546.17
	2.09497	0.16198	2.2103	0.06459	150.828	43.8894	150.163	43.4136	988.057	608.481	991.654	627.906
	2.11208	0.1722	2.2151	0.07705	153.873	49.2415	155.392	49.199	1037.41	706.065	1061.75	721.288
	2.12839	0.19207	2.22084	0.0919	160.758	55.7852	161.367	55.6857	1128.44	813.488	1143.19	827.774
	2.1491	0.21351	2.22768	0.10962	167.413	62.8922	168.187	62.943	1213.01	939.688	1237.88	948.964
	2.1761	0.18337	2.23585	0.13076	175.024	70.9983	175.958	71.0395	1319.36	1084.06	1347.99	1086.49
	2.19606	0.26584	2.2456	0.15596	183.843	80.0078	184.796	80.0502	1447.59	1247.61	1476.06	1242.09
	2.22462	0.2992	2.25723	0.18603	193.757	90.4907	194.826	90.0546	1597.42	1433.26	1625.1	1417.54
	2.2554	0.33792	2.27112	0.22188	205.188	101.645	206.175	101.135	1774.1	1638.23	1798.48	1614.51
	2.29014	0.38359	2.2877	0.26463	218.262	113.917	218.983	113.384	2005.64	1840.61	2000.2	1834.59
	2.32966	0.43628	2.3075	0.31561	232.827	127.604	233.383	126.904	2235.74	2106.74	2234.66	2078.99
	2.37468	0.50531	2.33115	0.3764	249	142.393	249.521	141.817	2516.55	2405.08	2506.95	2348.55
	2.42548	0.56979	2.3594	0.44888	267.139	159.736	267.54	158.268	2853.86	2694.52	2822.61	2643.39
	2.48192	0.65523	2.39316	0.53528	286.98	177.911	287.593	176.437	3231.87	3018.37	3187.63	2962.73
	2.54652	0.75207	2.43352	0.63829	309.522	198.059	309.847	196.549	3670.76	3361.68	3608.39	3304.6
	2.61696	0.86503	2.48177	0.76105	334.548	220.225	334.479	218.873	4162.76	3719.35	4091.03	3665.36
	2.6921	1.00952	2.5395	0.90732	361.746	244.622	361.707	243.747	4707.12	4086.34	4641.44	4039.72
	2.77763	1.16256	2.6086	1.08161	391.771	270.71	391.797	271.577	5409.1	4491.96	5264.61	4420.46
	2.8818	1.34587	2.69136	1.28918	424.437	303.257	425.07	302.828	6101.81	4737.61	5963.67	4798.24
	3.01088	1.56129	2.79056	1.53636	462.032	337.824	461.937	338.05	6886.02	5104.27	6739.61	5162.17
	3.14002	1.82109	2.90956	1.83055	503.199	377.194	502.887	377.841	7738.18	5391.64	7589.89	5499.98
	3.29355	2.13292	3.05246	2.1806	547.969	421.694	548.538	422.877	8654.71	5627.39	8508.53	5799.32
	3.46083	2.49861	3.22427	2.59686	596.93	472.571	599.619	473.876	9554.44	5815.09	9485.29	6048.69
	3.66751	2.94933	3.43111	3.09157	652.321	530.551	657.001	531.602	10512.3	5970.83	10506.2	6238.96
	3.89986	3.47519	3.68056	3.67917	715.828	597.69	721.717	596.863	11485.4	6078.43	11554.3	6364.74
	4.16927	4.10455	3.98184	4.37624	787.991	673.02	794.931	670.451	12435.9	6145.4	12610.5	6425.3
	4.4897	4.8655	4.34645	5.2023	870.958	759.47	878.01	753.181	13399.3	6186	13656	6425.24
	4.87598	5.76841	4.78877	6.18001	966.231	854.517	972.519	845.845	14334.5	6218.54	14673.8	6374.28
	5.35427	6.87396	5.32653	7.33505	1074.79	960.224	1080.2	949.146	15263.1	6249.5	15649.5	6286.53
	5.9186	8.15973	5.98221	8.69704	1205.16	1075.47	1203.06	1063.72	16168.2	6247.15	16573.4	6179.4
	6.60604	9.70657	6.78367	10.2986	1350.91	1202.29	1343.25	1189.99	17064.2	6254.51	17440.2	6072.37
	7.4294	11.5435	7.76627	12.1761	1515.01	1335.52	1503.23	1328.19	17914.6	6290.69	18249.3	5985.77
	8.49828	13.7403	8.9742	14.3685	1699.06	1476.55	1685.6	1478.2	18790.2	6335.05	19004.3	5940.01
	9.6328	16.4414	10.4629	16.9157	1918.77	1638.16	1893.1	1639.48	19677.3	6076.98	19712.4	5955.03
	11.4122	19.4012	12.3018	19.8572	2139.74	1797.89	2128.64	1810.98	20451.2	6490.29	20383.6	6050.31
	13.421	22.9091	14.5753	23.2261	2379.63	1970.2	2394.94	1990.92	21216.3	6734.36	21030.3	6244.92
	16.0044	26.9861	17.387	27.0458	2712.48	2094.51	2694.62	2176.82	22055.1	6983.92	21666.9	6558.06
	19.9847	31.4876	20.8598	31.3216	3018.29	2292.6	3029.92	2365.38	22767	7366.59	22309.8	7009.7
	24.3262	36.7942	25.133	36.0279	3357.63	2499.74	3402.33	2552.4	23519.2	7816.03	22976.9	7621
	29.6826	42.3855	30.3598	41.0991	3759.21	2709.04	3812.53	2732.95	24333.4	8475.15	23688.7	8415.42
	36.7266	48.5762	36.691	46.4112	4193.18	2907.06	4259.8	2901.37	25052.9	9315.15	24467.9	9418.7
	45.0805	54.5226	44.259	51.7761	4680.45	3086.81	4742.08	3051.72	25844.3	10354.5	25340.8	10660.3
	55.436	59.9386	53.1453	56.9339	5202.9	3238.7	5255.59	3178.03	26838.7	11689.3	26338.2	12173
	67.7343	64.6217	63.3471	61.5655	5778.67	3344.15	5794.86	3274.84	27877.9	13381.2	27496.1	13993.8
	80.5555	67.5856	74.7471	65.3232	6379.07	3394.65	6352.98	3337.65	28947.4	15420.7	28857.9	16164.1
	94.4137	68.4966	87.0874	67.878	6983.87	3397.97	6921.55	3363.38	30227.9	17914.5	30475.3	18727.9
	107.549	67.5377	99.9896	68.9837	7567.32	3356.6	7491.68	3350.75	31791.3	20929.6	32411.4	21732.8
	120.513	65.566	112.994	68.5273	8154.97	3237.54	8054.4	3300.38	33886.6	24590.3	34742.9	25227.6
	131.392	62.2798	125.621	66.5562	8677.84	3117.54	8601.07	3214.72	36768.9	29026	37562	29258.1
	141.585	57.4679	137.453	63.2658	9199.81	2974.94	9124.32	3097.78	39962.5	33820.5	40980.4	33865.5
	149.92	53.5871	148.177	58.9584	9666.28	2826.37	9617.98	2954.75	44595.2	39628.2	45129.5	39075.9
	157.506	49.1045	157.621	53.9797	10117.9	2676.47	10077.8	2791.45	49951.1	45700.7	50163.3	44896
	165.225	45.3729	165.736	48.6661	10524.1	2571.05	10500.9	2613.89	56760.9	52255.3	56255.1	51298.3
	169.889	40.8417	172.571	43.3045	10908.5	2400.54	10886.4	2427.82	66126.6	59131.5	63592	58208.4
	175.293	36.7857	178.191	38.1648	11241.4	2278.06	11230.9	2240.36	76652	65170.1	72266.7	65416.2
